# Supplementary material for: Comparison of miRNA Expression Profiles between HIV-1 and HIV-2 Infected Monocyte-Derived Macrophages (MDMs) and Peripheral Blood Mononuclear Cells (PBMCs)
Source: MDPI journal article supplement (doi:10.3390/ijms21186970), 2020-09-22
Supplement: s1 [file s1]

## MDMs

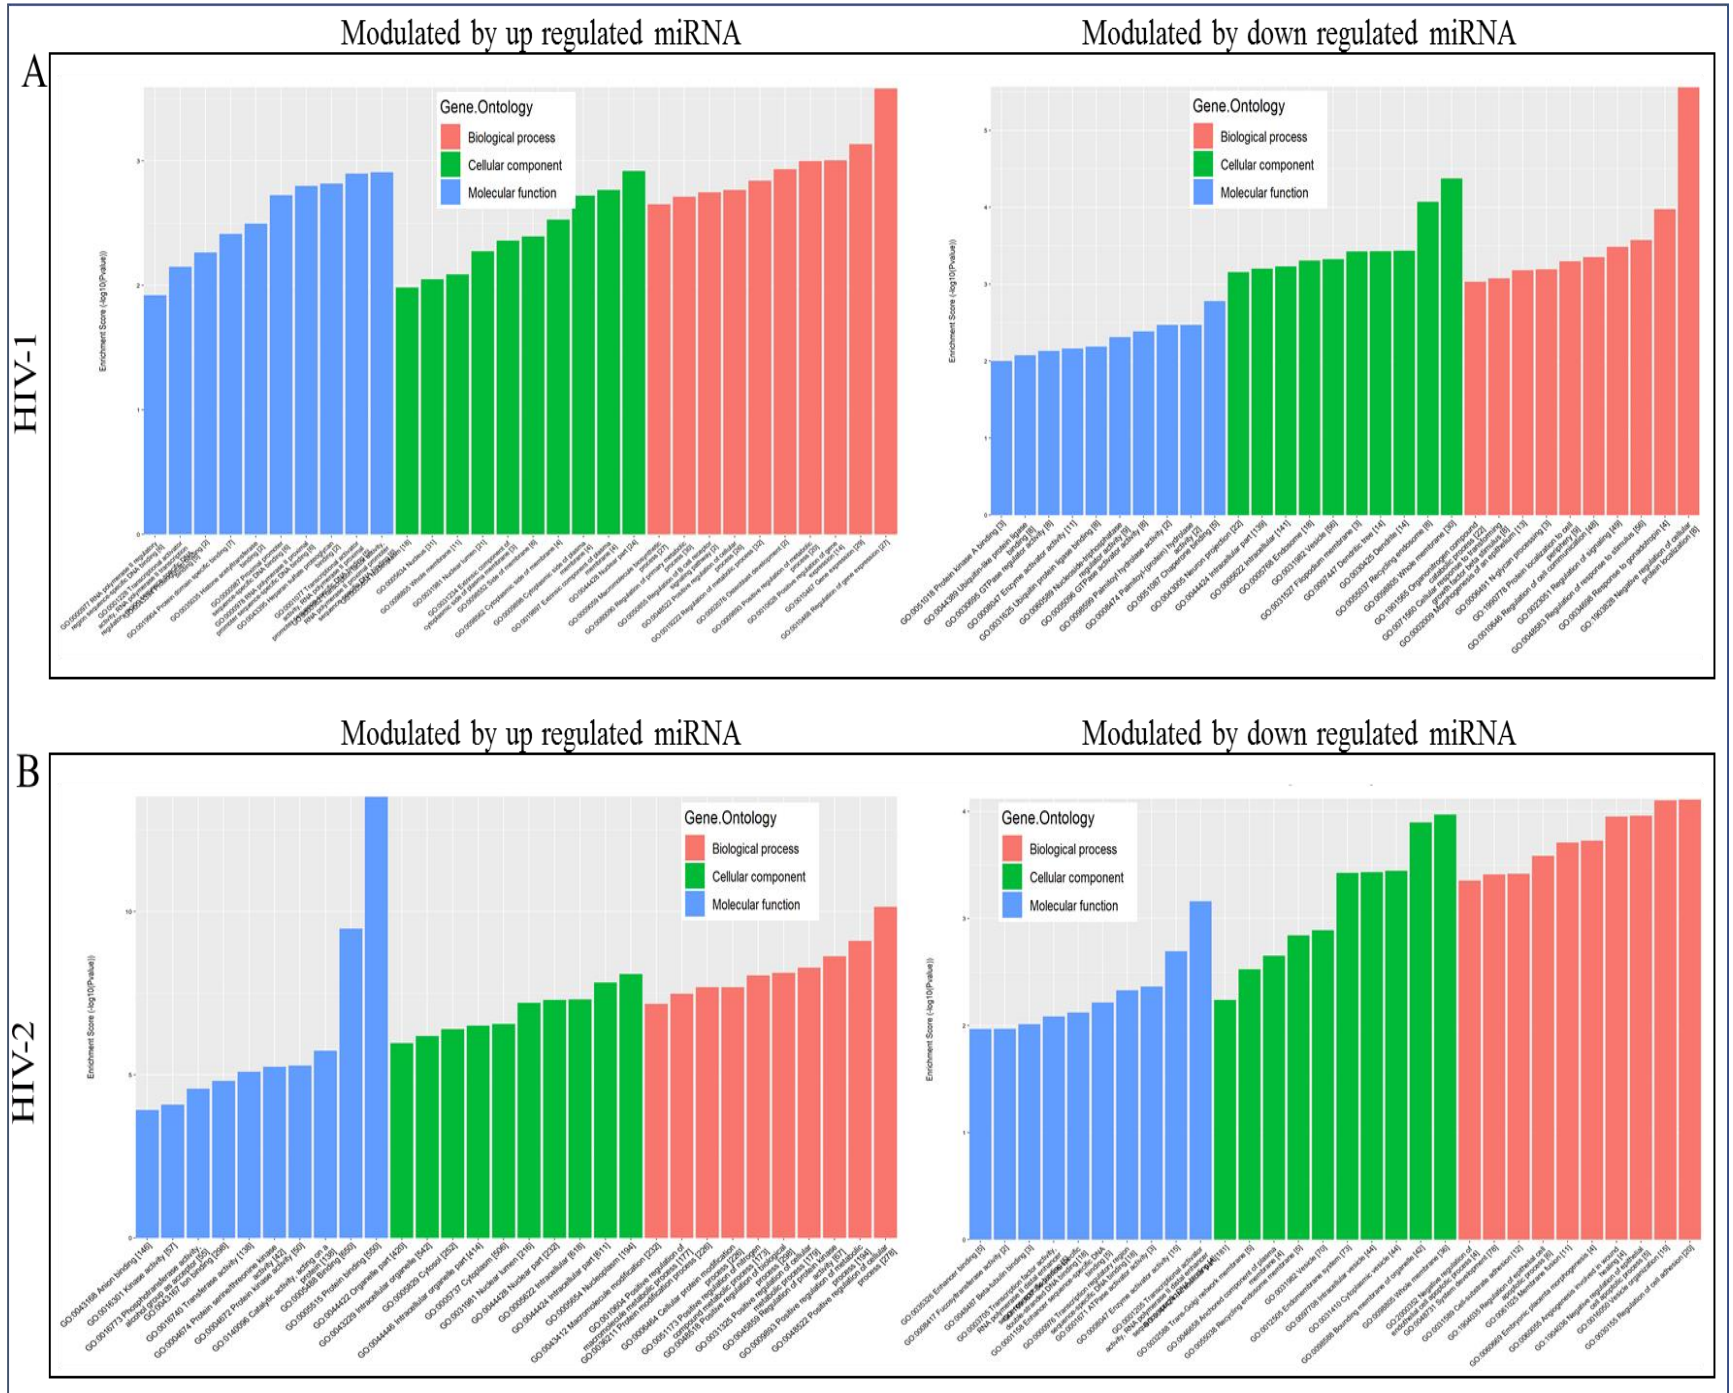

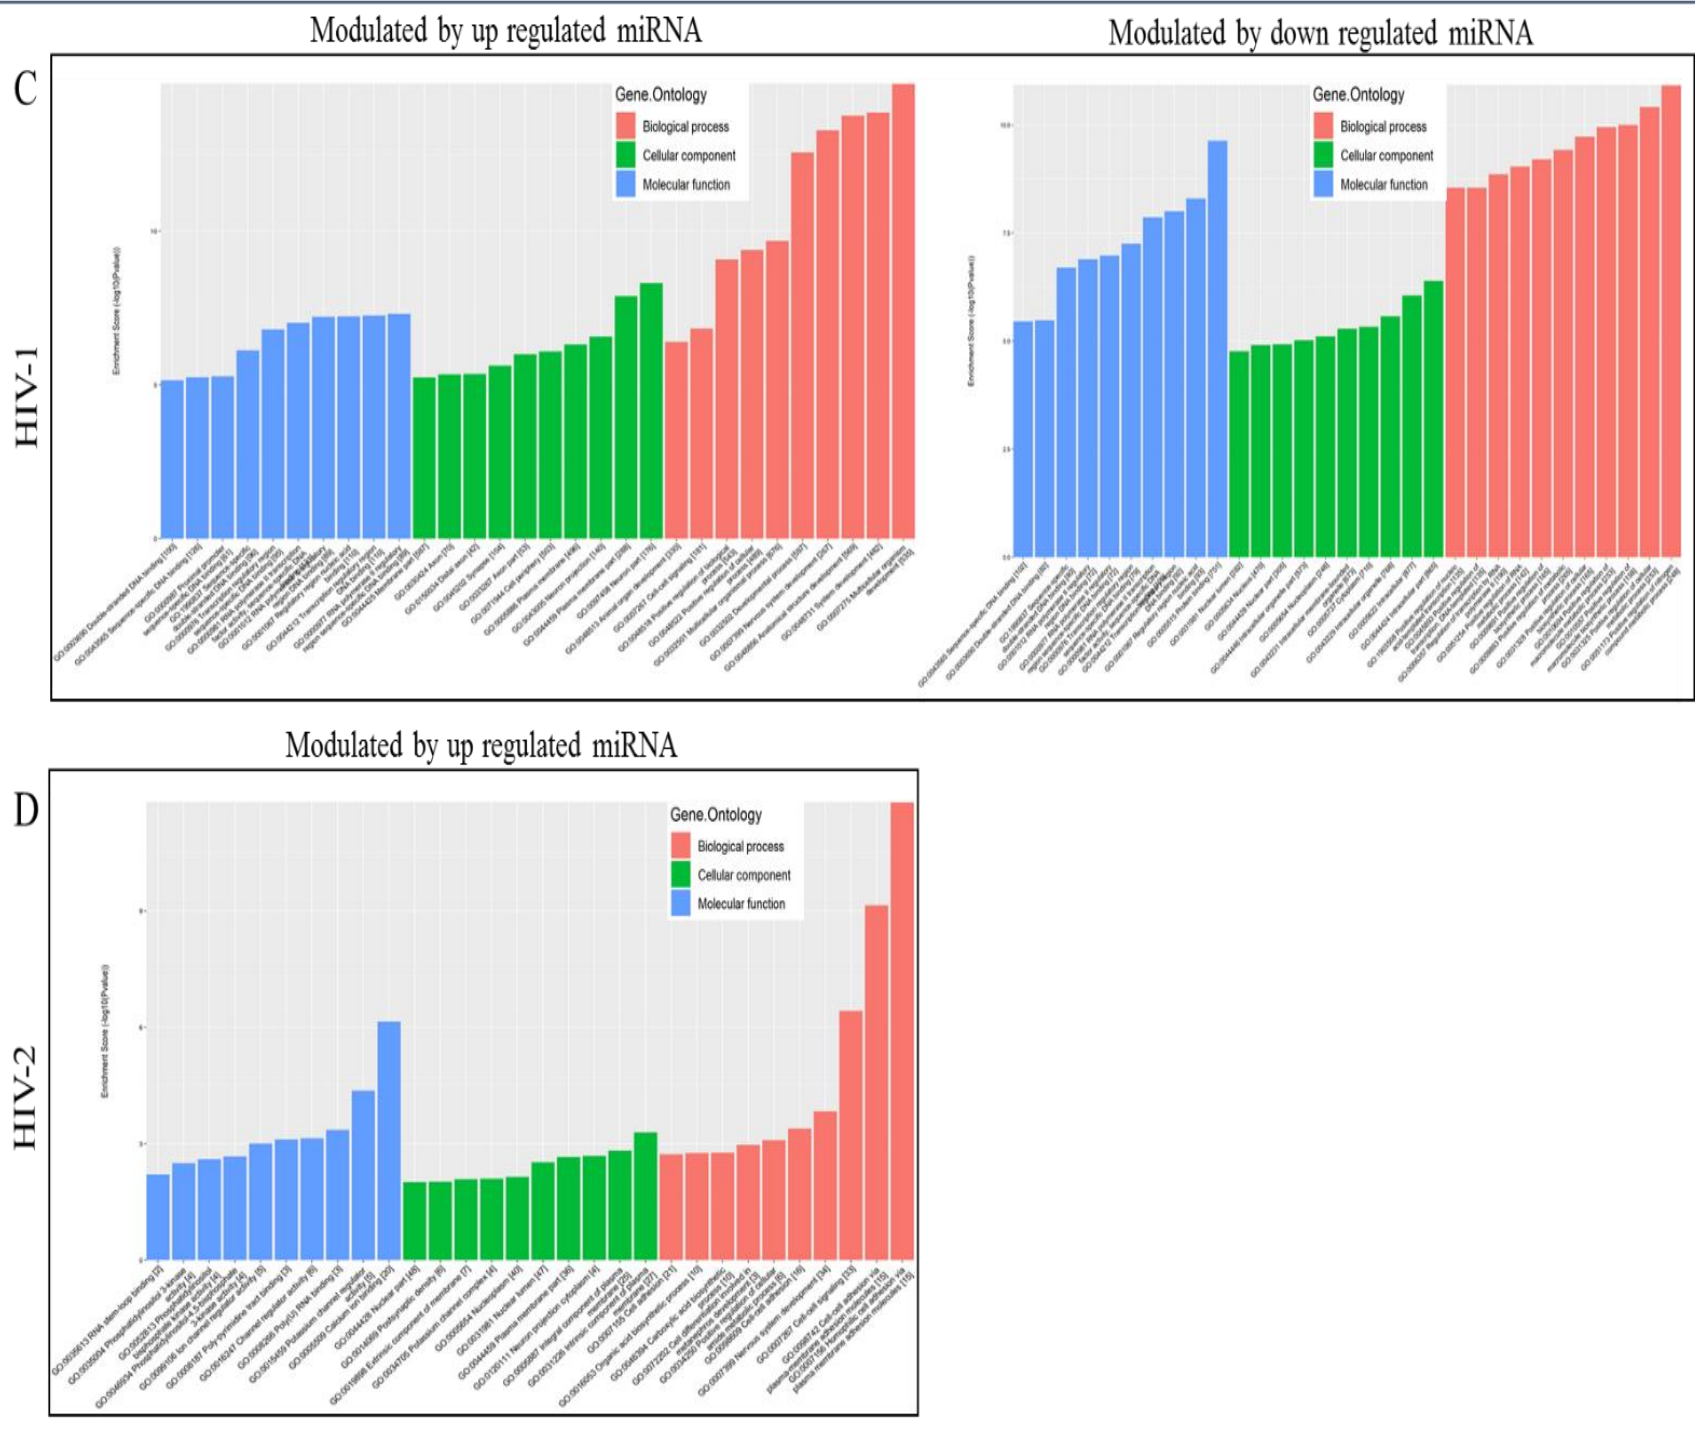

**Figure S5: GO analysis of differentially expressed miRNAs targets in MDMs and PBMCs.**

- (A) GO functional annotation of differentially expressed miRNAs predicted target genes, including biological process, cellular component and molecular function in HIV-1 infected MDMs.
- (B) GO functional annotation of differentially expressed miRNAs predicted target genes, including biological process, cellular component and molecular function in HIV-2 infected MDMs.
- (C) GO functional annotation of differentially expressed miRNAs predicted target genes, including biological process, cellular component and molecular function in HIV-1 infected PBMCs.
- (D) GO functional annotation of differentially expressed miRNAs predicted target genes, including biological process, cellular component and molecular function in HIV-2 infected PBMCs.
