# Supplementary material for: Comparison of miRNA Expression Profiles between HIV-1 and HIV-2 Infected Monocyte-Derived Macrophages (MDMs) and Peripheral Blood Mononuclear Cells (PBMCs)
Source: MDPI journal article supplement (doi:10.3390/ijms21186970), 2020-09-22
Supplement: s1 [file s1]

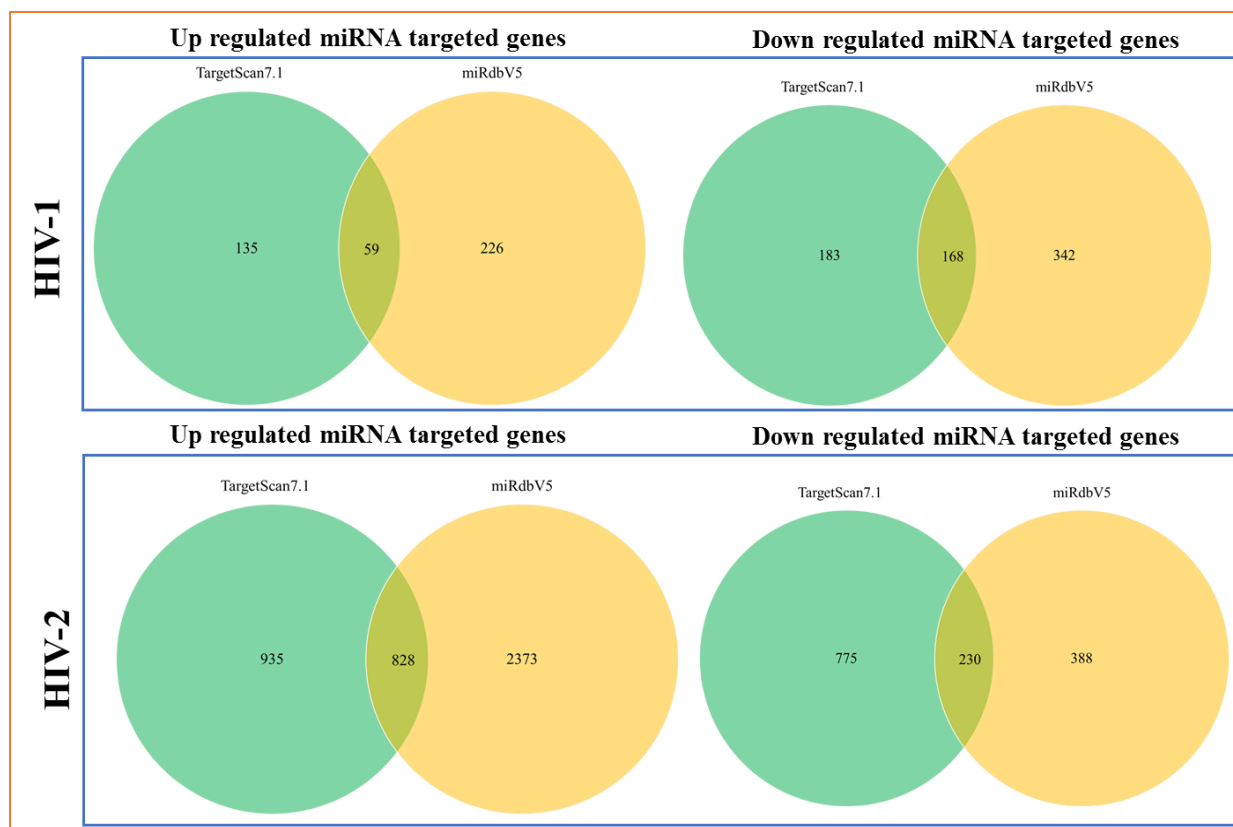

(A) MDMs

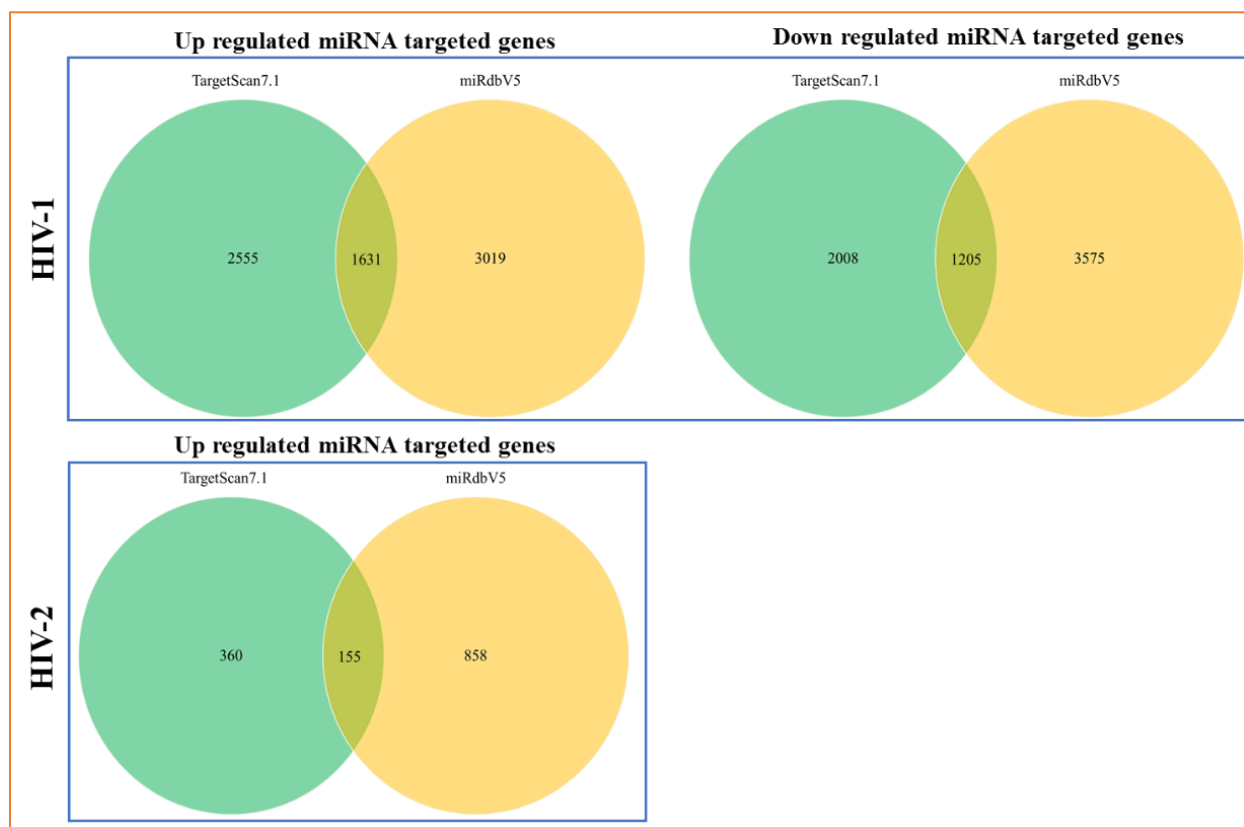

(B) PBMCs

Figure S3: Venn diagram representation of the number of differentially expressed miRNA targeted genes identified by TargetScan 7.1 and miRdbV5 database that are overlapping among HIV-1/ HIV-2 infected **MDMs** (A) and **PBMCs** (B) compared with uninfected control MDMs and PBMCs
