# Supplementary material for: Comparison of miRNA Expression Profiles between HIV-1 and HIV-2 Infected Monocyte-Derived Macrophages (MDMs) and Peripheral Blood Mononuclear Cells (PBMCs)
Source: MDPI journal article supplement (doi:10.3390/ijms21186970), 2020-09-22
Supplement: s1 [file s1]

Control

Donor 1

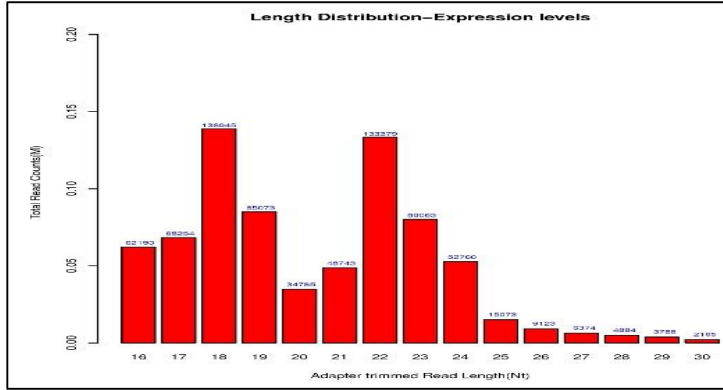

Donor 2

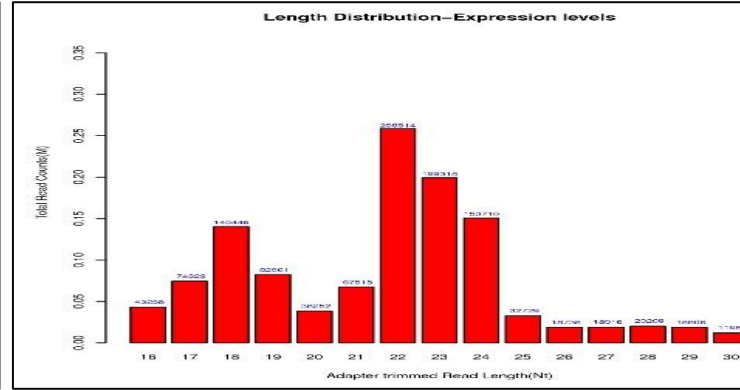

Donor 3

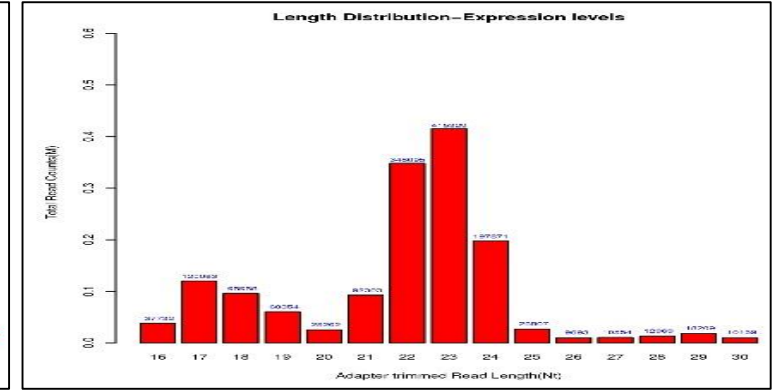

HIV-1

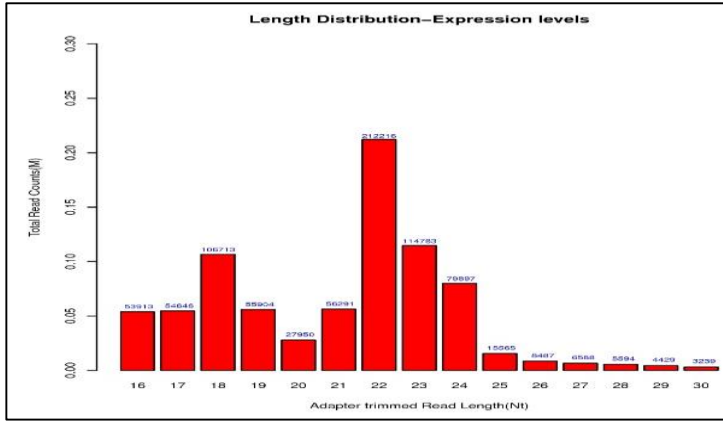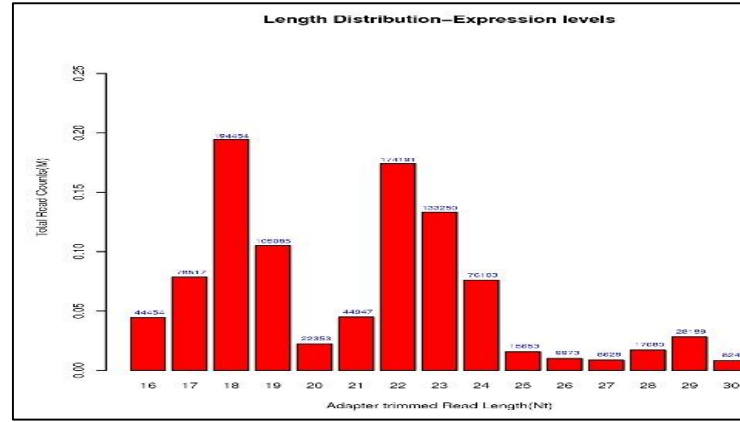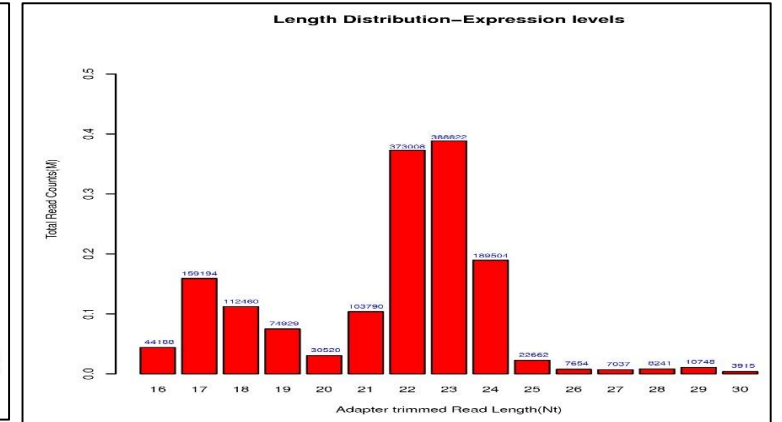

HIV-2

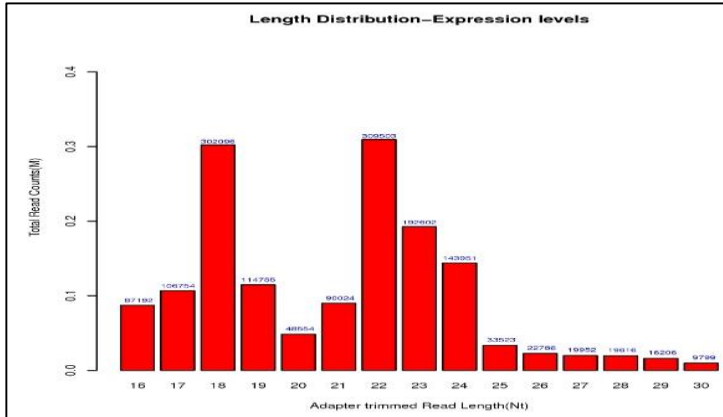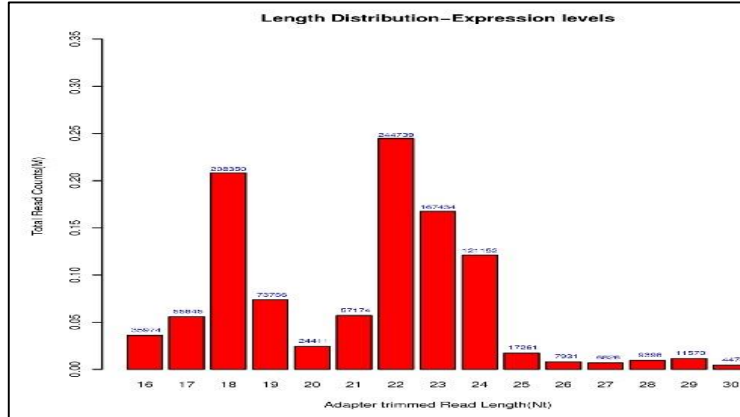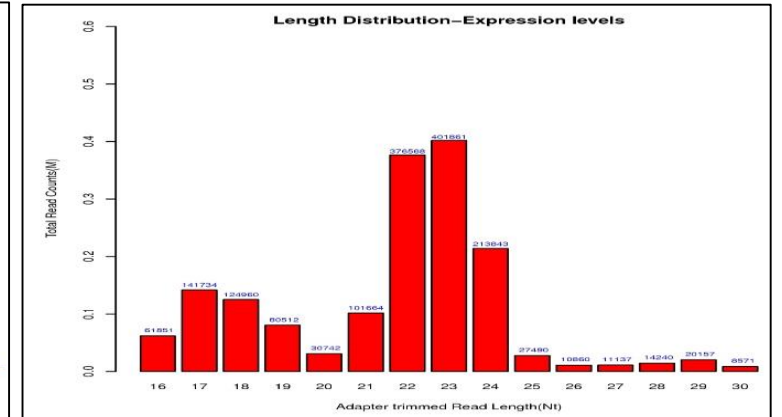

(A) MDM

Control

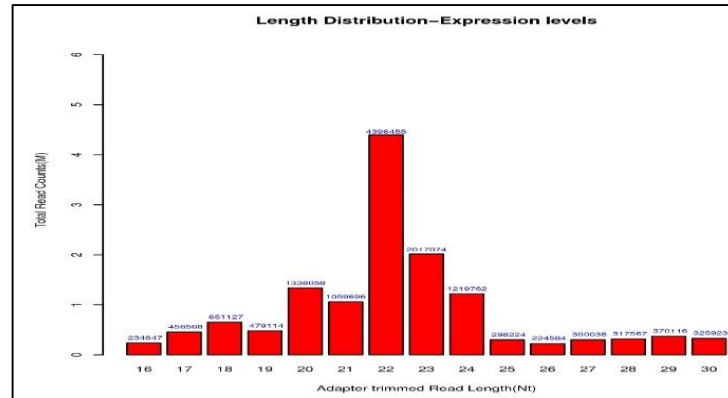

Donor 2

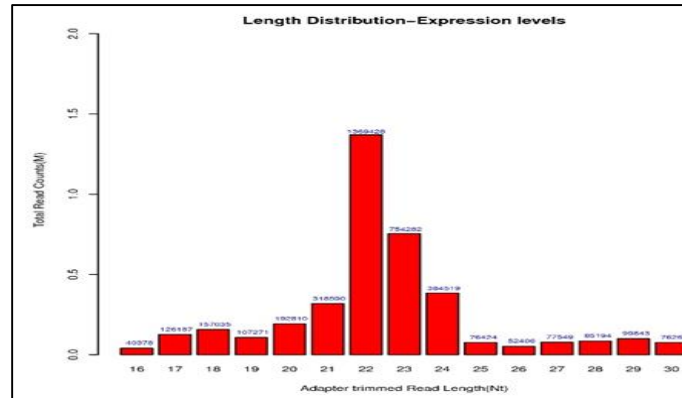

Donor 3

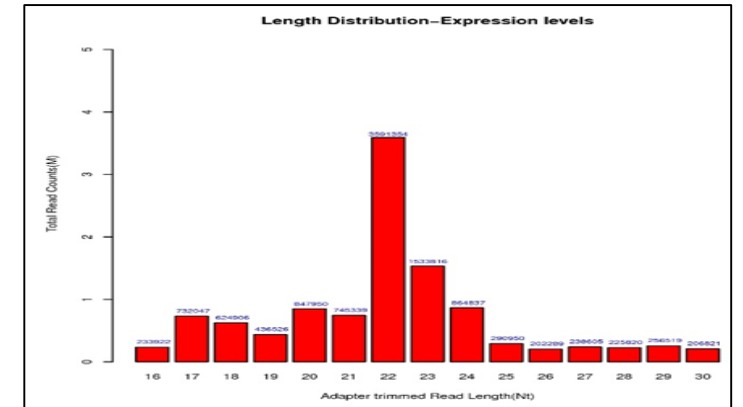

HIV-1

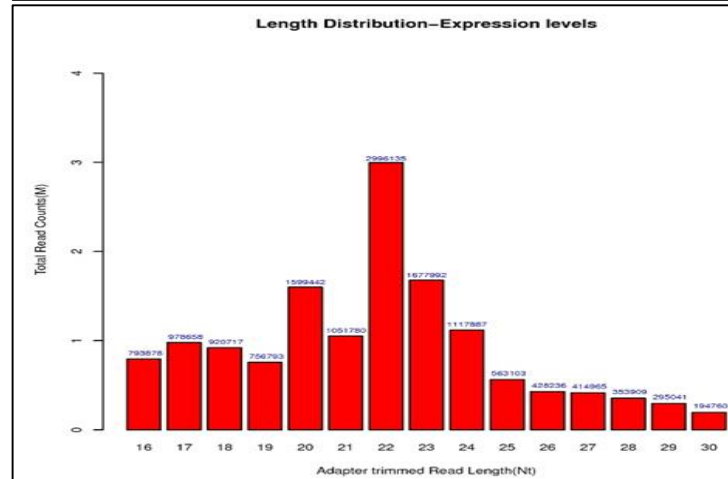

(B) PBMC

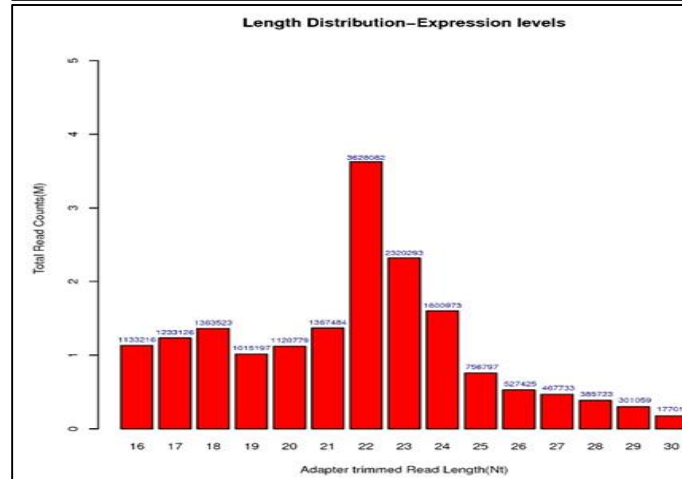

Length Distribution-Expression levels

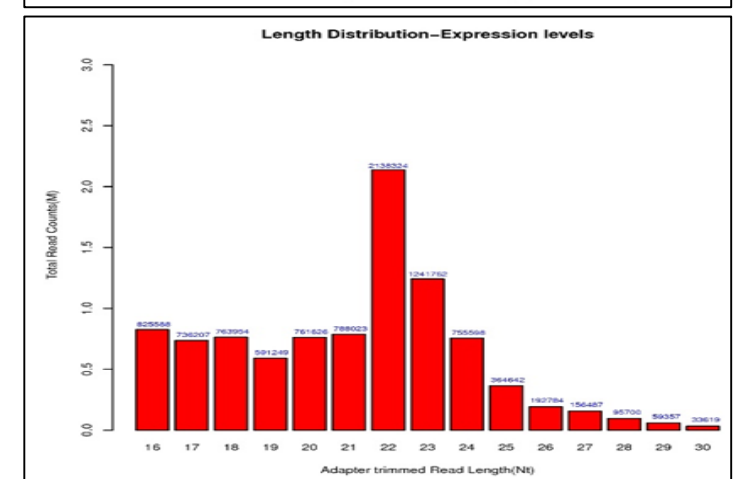

HIV-2

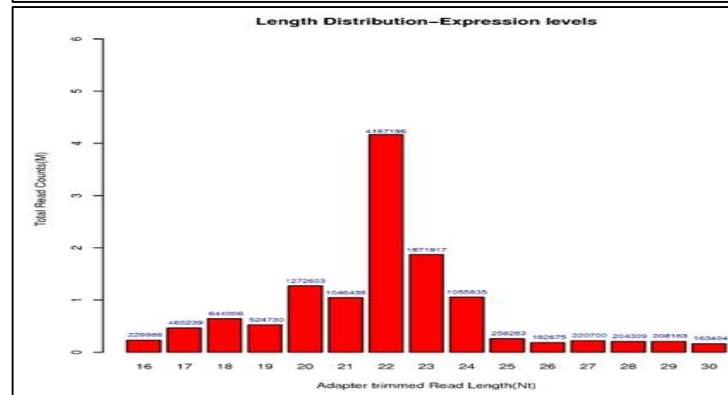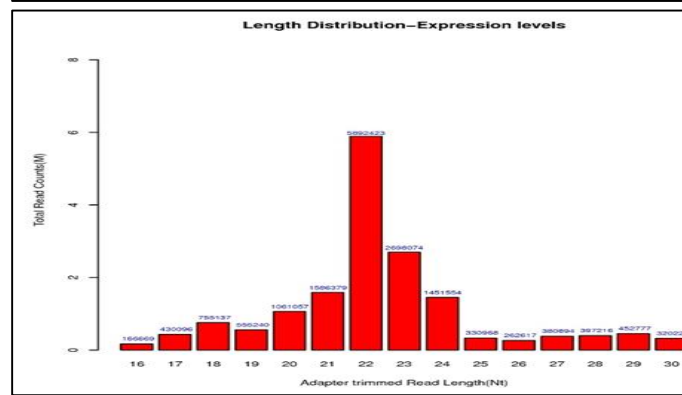

Length Distribution-Expression levels

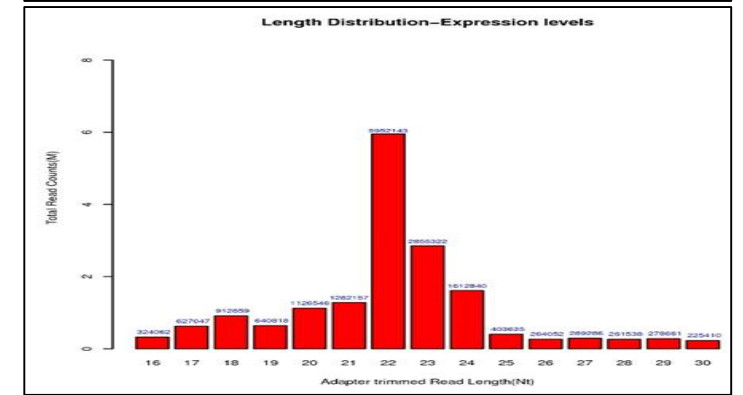

**Figure S1: The length distribution of total small RNAs in all eighteen libraries.**

The distribution of small RNAs in MDMs (A) and PBMCs (B) for each group. The vertical axis indicates the total read counts and the horizontal axis indicates the read lengths for the complete adapter-trimmed read sets.
