# Supplementary material for: Comparison of miRNA Expression Profiles between HIV-1 and HIV-2 Infected Monocyte-Derived Macrophages (MDMs) and Peripheral Blood Mononuclear Cells (PBMCs)
Source: MDPI journal article supplement (doi:10.3390/ijms21186970), 2020-09-22
Supplement: s1 [file s1]

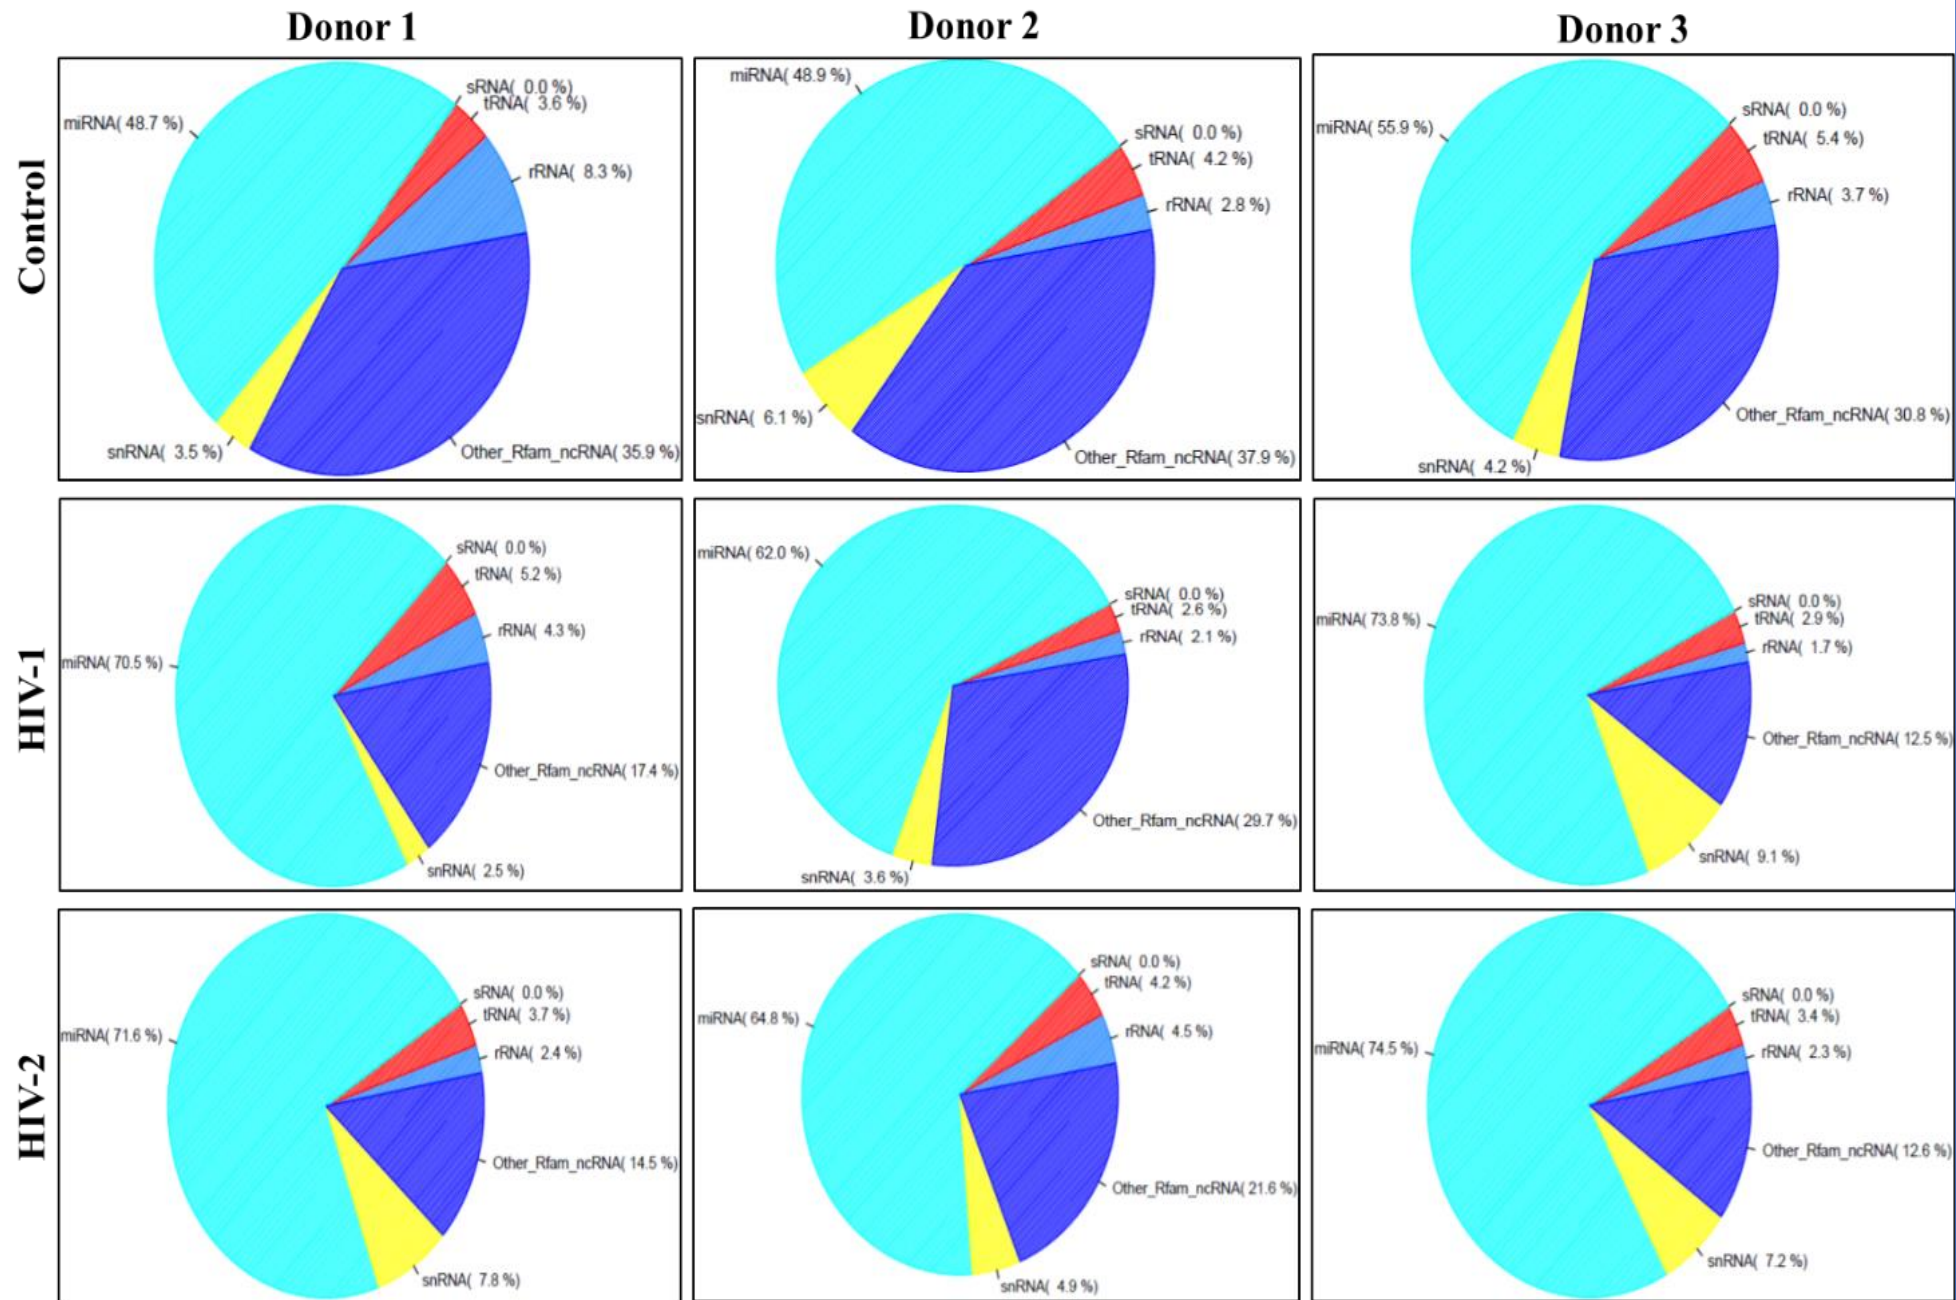

(A) MDMs

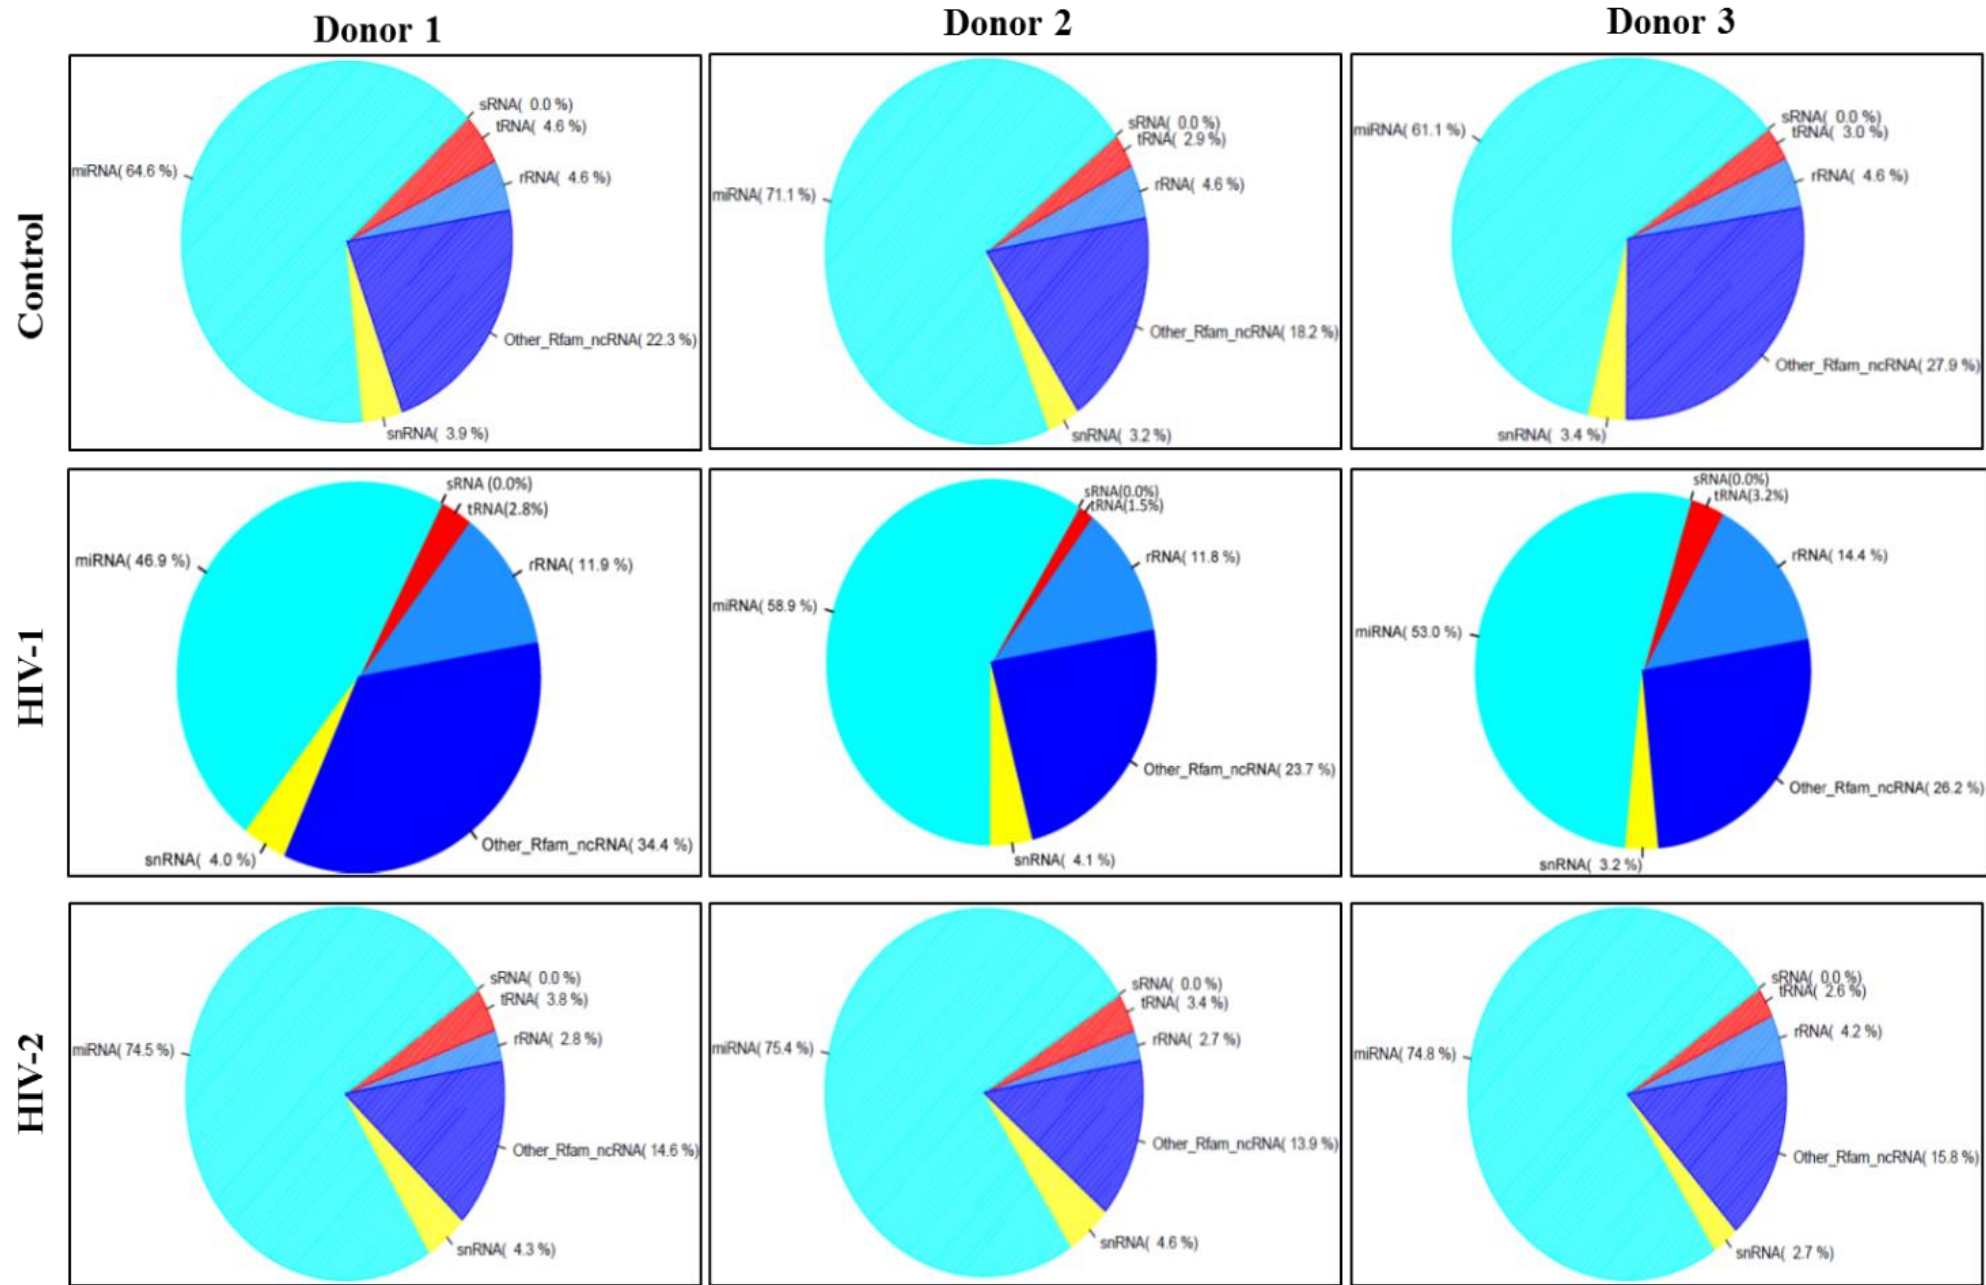

(B) PBMCs

**Figure S2: Frequency of different classes of RNA in small RNA libraries.**

The pie-charts represent an overview of small RNA expression in (A) uninfected control MDMs and HIV-1/HIV-2 infected MDMs; (B) uninfected control PBMCs and HIV-1/HIV-2 infected PBMCs.
