# Supplementary material for: Comparison of miRNA Expression Profiles between HIV-1 and HIV-2 Infected Monocyte-Derived Macrophages (MDMs) and Peripheral Blood Mononuclear Cells (PBMCs)
Source: Int J Mol Sci. 2020 Sep 22;21(18):6970. doi: 10.3390/ijms21186970 (PMC7556008; doi:10.3390/ijms21186970)
Supplement: Supplementary file 1 [file ijms-21-06970-s001.zip]

Archive with 6 entries (6 files):
- Figure S1 .pdf
- Figure S2 .pdf
- Figure S3.pdf
- Figure S4.pdf
- Figure S5.pdf
- Supplementary Table.xlsx
