# Supplementary material for: Comparison of miRNA Expression Profiles between HIV-1 and HIV-2 Infected Monocyte-Derived Macrophages (MDMs) and Peripheral Blood Mononuclear Cells (PBMCs)
Source: Int J Mol Sci. 2020 Sep 22;21(18):6970. doi: 10.3390/ijms21186970 (PMC7556008; doi:10.3390/ijms21186970)
Supplement: Supplementary file 1 [file ijms-21-06970-s001.zip › Supplementary Table.xlsx]

## Sheet: Table S1
Table S1: Differentially expressed miRNAs in HIV-1/HIV-2 infected PBMCs and Uninfected Controls
Table S1.1: HIV-1 infected PBMCs and Uninfected Control							Table S1.2: HIV-2 infected PBMCs and Uninfected Control
miRNA	HIV-1 (TPM)	Control (TPM)	Fold change	p-value	Regulated		miRNA	HIV-2 (TPM)	Control (TPM)	Fold change	p-value	Regulated
hsa-miR-3195	38.3333	10	3.83333	0.0159188	up		hsa-miR-18a-3p	80	65.3333	1.22449	0.0174768	down
hsa-miR-3653-3p	20.3333	12.6667	1.60526	0.0493544	up		hsa-miR-320b	53.6667	36.6667	1.46364	0.0276577	down
hsa-miR-3656	37.6667	10	3.76667	0.0227884	up		hsa-miR-novel-chr3_49039	30	23	1.30435	0.0077626	down
hsa-miR-4488	56.6667	10.3333	5.48387	0.0055449	up		hsa-miR-novel-chr9_73665	14	11.3333	1.23529	0.0390205	down
hsa-miR-4492	14.3333	10	1.43333	0.00289001	up
hsa-miR-4516	73	10.6667	6.84375	0.0296294	up
hsa-miR-6087	22.6667	10	2.26667	0.00095358	up
hsa-miR-novel-chr12_7775	585.333	160	3.65833	0.003566	up
hsa-miR-novel-chr12_9255	187.667	10.3333	18.1613	0.000834057	up
hsa-miR-novel-chr14_14203	1220	89.3333	13.6567	0.0188801	up
hsa-miR-novel-chr15_15429	139.333	23.3333	5.97143	0.003102	up
hsa-miR-novel-chr16_20583	1268.33	24.6667	51.4189	0.00177291	up
hsa-miR-novel-chr17_22107	99	14.3333	6.90698	0.00357753	up
hsa-miR-novel-chr18_25107	213.333	17.3333	12.3077	0.000283448	up
hsa-miR-novel-chr18_25108	63.3333	11.6667	5.42857	0.0050382	up
hsa-miR-novel-chr19_26588	34	10	3.4	0.0243213	up
hsa-miR-novel-chr19_28703	82	12	6.83333	0.0371607	up
hsa-miR-novel-chr19_28987	220.333	55.6667	3.95808	0.00479081	up
hsa-miR-novel-chr1_31146	271.667	13.3333	20.375	0.0238231	up
hsa-miR-novel-chr1_36362	973.333	234.333	4.15363	0.0183177	up
hsa-miR-novel-chr20_38842	3952	19.6667	200.949	0.00528884	up
hsa-miR-novel-chr20_38876	2046.33	100.333	20.3953	0.0171321	up
hsa-miR-novel-chr20_39290	116	14.6667	7.90909	1.28673e-05	up
hsa-miR-novel-chr20_39319	76	10.3333	7.35484	0.00042738	up
hsa-miR-novel-chr22_42100	1032.67	72	14.3426	0.0377692	up
hsa-miR-novel-chr22_42342	38.6667	14	2.76191	0.01149	up
hsa-miR-novel-chr2_45640	1899	328.667	5.77789	0.00825755	up
hsa-miR-novel-chr2_47229	128.667	15.6667	8.21277	0.019302	up
hsa-miR-novel-chr2_47550	18.3333	10	1.83333	0.0378711	up
hsa-miR-novel-chr3_48687	130544	12735	10.2508	0.0100896	up
hsa-miR-novel-chr3_50926	347	13.6667	25.3902	0.00695528	up
hsa-miR-novel-chr3_50930	387	34.6667	11.1635	0.0159773	up
hsa-miR-novel-chr3_52862	581.667	26.6667	21.8125	0.0100332	up
hsa-miR-novel-chr4_55627	1199.33	31.6667	37.8737	0.0252867	up
hsa-miR-novel-chr7_65542	271.333	13.3333	20.35	0.0241997	up
hsa-miR-novel-chr7_66499	19.3333	10	1.93333	0.0345059	up
hsa-miR-novel-chr8_70621	21.3333	15	1.42222	0.0120725	up
hsa-miR-novel-chr8_70917	448.333	40.3333	11.1157	0.0294737	up
hsa-miR-novel-chr9_72120	72.3333	13	5.5641	1.5986e-05	up
hsa-miR-novel-chr9_73243	40	10	4	0.000283679	up
hsa-miR-novel-chr9_73866	100.333	10	10.0333	0.0233668	up
hsa-let-7a-1	3392.67	6350	0.534278	0.0226948	down
hsa-let-7a-2	3391	6346	0.534352	0.0224867	down
hsa-let-7a-3	3420	6361	0.537651	0.0228191	down
hsa-let-7d-5p	805	1850.33	0.435057	0.00393654	down
hsa-let-7f-1-3p	37.6667	57	0.660819	0.00326171	down
hsa-let-7f-1	31321	44548	0.703084	0.0354883	down
hsa-let-7f-2	30236	42958.7	0.703839	0.0326212	down
hsa-let-7g-5p	55563.3	82986	0.669551	0.0183321	down
hsa-mir-103a-1	2407	3351.33	0.718222	0.037604	down
hsa-mir-103a-2	2393.33	3325	0.719799	0.0396165	down
hsa-miR-1180-3p	11.6667	17	0.686275	0.0269973	down
hsa-miR-1268a	14.6667	24.6667	0.594595	0.0174576	down
hsa-miR-1273h-3p	53.3333	153.667	0.347072	0.0268233	down
hsa-miR-1273h-5p	16.3333	43.6667	0.374046	0.0398541	down
hsa-miR-128-3p	582.333	996.333	0.584476	0.0272742	down
hsa-miR-1292-5p	11.6667	15.3333	0.76087	0.00147312	down
hsa-miR-1294	14	17.6667	0.792453	0.00532813	down
hsa-miR-1301-3p	94	240.667	0.390582	0.0177636	down
hsa-miR-1304-5p	15.6667	26.3333	0.594937	0.00750338	down
hsa-miR-1306-5p	15.3333	23.6667	0.647887	0.0115161	down
hsa-miR-1307-3p	932.333	1720	0.542054	0.0398697	down
hsa-miR-130b-3p	51	75.3333	0.676991	0.00012802	down
hsa-miR-15b-3p	128.333	204.333	0.628059	0.00814168	down
hsa-miR-15b-5p	643	930	0.691398	0.0363238	down
hsa-miR-16-2-3p	443.667	708.667	0.626058	0.00726791	down
hsa-miR-181b-3p	35.3333	54.3333	0.650307	0.0281843	down
hsa-miR-181b-5p	637.667	1089	0.585552	0.0373316	down
hsa-miR-181b-5p	581.667	962	0.604643	0.049352	down
hsa-miR-185-5p	788.333	1884	0.418436	0.00299846	down
hsa-miR-18a-3p	43.3333	65.3333	0.663265	0.000912048	down
hsa-miR-191-3p	11	20	0.55	0.0124135	down
hsa-miR-191-5p	5487	11144	0.492373	0.00825087	down
hsa-miR-219a-1-3p	11.6667	15.6667	0.744681	0.0132356	down
hsa-miR-222-3p	1933	3656.67	0.528624	0.0242737	down
hsa-miR-2277-5p	24.6667	38.6667	0.637931	0.0339921	down
hsa-miR-23b-5p	11	14	0.785714	0.00653338	down
hsa-miR-25-5p	59.6667	96	0.621528	0.00138361	down
hsa-mir-26a-1	8853.67	14609	0.606042	0.021164	down
hsa-mir-26a-2-3p	8863	14623.3	0.606086	0.0211	down
hsa-miR-301a-5p	15.6667	20.6667	0.758065	0.0423157	down
hsa-miR-30b-3p	13.6667	18	0.759259	0.0313757	down
hsa-miR-30c-1-3p	56.3333	93.3333	0.603571	0.00199288	down
hsa-miR-30c-5p	2133.67	3230	0.660578	0.0043504	down
hsa-miR-30c-5p	2132	3226.33	0.660812	0.00433276	down
hsa-miR-30d-5p	7514.33	12865.3	0.584076	0.0191276	down
hsa-miR-3173-5p	13.6667	20	0.683333	0.0269653	down
hsa-miR-320a	795	1411.67	0.563164	0.0186535	down
hsa-miR-320c	102	202.667	0.503289	0.0127652	down
hsa-miR-326	15	21	0.714286	0.039942	down
hsa-miR-328-3p	89	167	0.532934	0.015319	down
hsa-miR-330-3p	155.333	281.333	0.552133	0.0304011	down
hsa-miR-331-5p	32	43.6667	0.732824	0.010979	down
hsa-miR-361-5p	111.667	185.333	0.602518	0.0478765	down
hsa-miR-423-3p	3571.33	6501	0.549351	0.0284349	down
hsa-miR-425-3p	100.667	162.667	0.618852	0.00614382	down
hsa-miR-454-5p	38	58.3333	0.651429	0.0203647	down
hsa-miR-484	532.333	1164.33	0.4572	0.00303504	down
hsa-miR-5001-3p	14	18.3333	0.763636	0.0313757	down
hsa-miR-505-3p	69	128.333	0.537662	0.0349541	down
hsa-miR-574-5p	10.3333	12.6667	0.815789	0.0351685	down
hsa-miR-576-3p	72	130.667	0.55102	0.013068	down
hsa-miR-597-3p	11.6667	15	0.777778	0.00749043	down
hsa-miR-641	13.3333	17.6667	0.754717	0.0172528	down
hsa-miR-652-3p	107.333	135.333	0.793103	0.0188713	down
hsa-miR-671-3p	85.6667	201	0.426202	0.0186061	down
hsa-miR-671-5p	21.6667	58.6667	0.369318	0.0386936	down
hsa-miR-6866-5p	10	13	0.769231	0.00653338	down
hsa-mir-7-1	1457.67	3923.33	0.371538	0.00212047	down
hsa-mir-7-2	1422	3824	0.371862	0.00213866	down
hsa-mir-7-3	1422.67	3824	0.372036	0.00210375	down
hsa-miR-760	12	17	0.705882	0.0375901	down
hsa-miR-766-3p	101.333	167.333	0.605578	0.0458064	down
hsa-miR-766-5p	11.3333	21.6667	0.523077	0.00634045	down
hsa-miR-769-3p	11.3333	15.6667	0.723404	0.0100597	down
hsa-miR-769-5p	177.333	243	0.729767	0.0114563	down
hsa-miR-7976	24.3333	32.6667	0.744898	0.0218364	down
hsa-miR-877-3p	11.6667	17.6667	0.660377	0.012009	down
hsa-mir-92a-1	11624.3	20147	0.576976	0.0132286	down
hsa-mir-92a-2	9196.33	15683.3	0.586376	0.00618941	down
hsa-miR-92b-3p	130.333	290.667	0.448394	0.027158	down
hsa-miR-93-3p	24.6667	37.3333	0.660714	0.0357651	down
hsa-mir-941-1	253.667	450.333	0.563286	0.0375619	down
hsa-mir-941-2	253.667	450.333	0.563286	0.0375619	down
hsa-mir-941-3	253.667	450.333	0.563286	0.0375619	down
hsa-mir-941-4	253.667	450.333	0.563286	0.0375619	down
hsa-mir-941-5	253.667	450.333	0.563286	0.0375619	down
hsa-miR-942-3p	13.6667	20.3333	0.672131	0.0205837	down
hsa-miR-942-5p	58	98	0.591837	0.0288069	down
hsa-miR-98-5p	702	1049.33	0.668996	0.0048849	down
hsa-miR-novel-chr12_10302	856	2100	0.407619	0.00486856	down
hsa-miR-novel-chr17_24567	46.6667	97.3333	0.479452	0.00293092	down
hsa-miR-novel-chr19_29383	108	226	0.477876	0.0113069	down
hsa-miR-novel-chr3_49039	15.3333	23	0.666667	0.00453542	down
hsa-miR-novel-chr3_49958	580.667	1043	0.556727	0.0463833	down
hsa-miR-novel-chr3_50649	856	2100	0.407619	0.00486856	down
hsa-miR-novel-chr5_57286	10	12	0.833333	0.0257214	down
hsa-miR-novel-chr5_60058	3142.33	4341.33	0.723818	0.028431	down

## Sheet: Table S2
Table S2:Differentially expressed miRNAs in HIV-1/HIV-2 infected MDMs and Uninfected Controls
Table S2.1: HIV-1 infected MDM and Uninfected Control							Table S2.2: HIV-2 infected MDM and Uninfected Control
miRNA	HIV-1 (TPM)	Control (TPM)	Fold change	p-value	Regulated		miRNA	HIV-2 (TPM)	Control (TPM)	Fold change	p-value	Regulated
hsa-miR-148b-5p	45.3333	24	1.88889	0.0363204	up		hsa-miR-542-3p	44	17	2.58824	0.0148337	up
hsa-miR-novel-chr17_21688	15.6667	11	1.42424	0.0405455	up		hsa-miR-375	33	15.3333	2.15217	0.0279838	up
hsa-miR-26a-2-3p	11	17	0.647059	0.017133	down		hsa-miR-148b-5p	47.3333	24	1.97222	0.00521092	up
hsa-mir-199a-1	17.6667	28	0.630952	0.0152167	down		hsa-miR-195-5p	20	11	1.81818	0.00787564	up
hsa-mir-199a-2	17.6667	28	0.630952	0.0152167	down		hsa-miR-30c-2-3p	16.6667	10	1.66667	0.0194418	up
							hsa-miR-4802-3p	40	24.3333	1.64384	0.0311142	up
							hsa-miR-novel-chr17_21688	16.6667	11	1.51515	0.0325054	up
							hsa-miR-26b-5p	7099.33	4979.33	1.42576	0.0359753	up
							hsa-miR-874-5p	11.3333	17.3333	0.653846	0.0383063	down
							hsa-miR-26a-2-3p	10.6667	17	0.627451	0.0089709	down

## Sheet: Table S3
Table S3: List of differentially expressed miRNAs in HIV-1 and HIV-2 infected cells (MDM and PBMC)
Table S3.1: List of differentially expresssed miRNAs in HIV-1 infected cells							Table S3.2: List of differentially expresssed miRNAs in HIV-2 infected cells
miRNA	Fold change	p-value	Regulated				miRNA	Fold change	p-value	Regulated
hsa-miR-148b-5p	1.88889	0.0363204	up				hsa-miR-542-3p	2.58824	0.0148337	up
hsa-miR-3195	3.83333	0.0159188	up				hsa-miR-375	2.15217	0.0279838	up
hsa-miR-3653-3p	1.60526	0.0493544	up				hsa-miR-148b-5p	1.97222	0.00521092	up
hsa-miR-3656	3.76667	0.0227884	up				hsa-miR-195-5p	1.81818	0.00787564	up
hsa-miR-4488	5.48387	0.0055449	up				hsa-miR-30c-2-3p	1.66667	0.0194418	up
hsa-miR-4492	1.43333	0.00289001	up				hsa-miR-4802-3p	1.64384	0.0311142	up
hsa-miR-4516	6.84375	0.0296294	up				hsa-miR-novel-chr17_21688	1.51515	0.0325054	up
hsa-miR-6087	2.26667	0.00095358	up				hsa-miR-26b-5p	1.42576	0.0359753	up
hsa-miR-novel-chr17_21688	1.42424	0.0405455	up				hsa-miR-874-5p	0.653846	0.0383063	down
hsa-miR-novel-chr12_7775	3.65833	0.003566	up				hsa-miR-26a-2-3p	0.627451	0.0089709	down
hsa-miR-novel-chr12_9255	18.1613	0.000834057	up				hsa-miR-18a-3p	1.22449	0.0174768	down
hsa-miR-novel-chr14_14203	13.6567	0.0188801	up				hsa-miR-320b	1.46364	0.0276577	down
hsa-miR-novel-chr15_15429	5.97143	0.003102	up				hsa-miR-novel-chr3_49039	1.30435	0.0077626	down
hsa-miR-novel-chr16_20583	51.4189	0.00177291	up				hsa-miR-novel-chr9_73665	1.23529	0.0390205	down
hsa-miR-novel-chr17_22107	6.90698	0.00357753	up
hsa-miR-novel-chr18_25107	12.3077	0.000283448	up
hsa-miR-novel-chr18_25108	5.42857	0.0050382	up
hsa-miR-novel-chr19_26588	3.4	0.0243213	up
hsa-miR-novel-chr19_28703	6.83333	0.0371607	up
hsa-miR-novel-chr19_28987	3.95808	0.00479081	up
hsa-miR-novel-chr1_31146	20.375	0.0238231	up
hsa-miR-novel-chr1_36362	4.15363	0.0183177	up
hsa-miR-novel-chr20_38842	200.949	0.00528884	up
hsa-miR-novel-chr20_38876	20.3953	0.0171321	up
hsa-miR-novel-chr20_39290	7.90909	1.28673e-05	up
hsa-miR-novel-chr20_39319	7.35484	0.00042738	up
hsa-miR-novel-chr22_42100	14.3426	0.0377692	up
hsa-miR-novel-chr22_42342	2.76191	0.01149	up
hsa-miR-novel-chr2_45640	5.77789	0.00825755	up
hsa-miR-novel-chr2_47229	8.21277	0.019302	up
hsa-miR-novel-chr2_47550	1.83333	0.0378711	up
hsa-miR-novel-chr3_48687	10.2508	0.0100896	up
hsa-miR-novel-chr3_50926	25.3902	0.00695528	up
hsa-miR-novel-chr3_50930	11.1635	0.0159773	up
hsa-miR-novel-chr3_52862	21.8125	0.0100332	up
hsa-miR-novel-chr4_55627	37.8737	0.0252867	up
hsa-miR-novel-chr7_65542	20.35	0.0241997	up
hsa-miR-novel-chr7_66499	1.93333	0.0345059	up
hsa-miR-novel-chr8_70621	1.42222	0.0120725	up
hsa-miR-novel-chr8_70917	11.1157	0.0294737	up
hsa-miR-novel-chr9_72120	5.5641	1.5986e-05	up
hsa-miR-novel-chr9_73243	4	0.000283679	up
hsa-miR-novel-chr9_73866	10.0333	0.0233668	up
hsa-let-7a-5p	0.534278	0.0226948	down
hsa-let-7a-5p	0.534352	0.0224867	down
hsa-let-7a-5p	0.537651	0.0228191	down
hsa-let-7d-5p	0.435057	0.00393654	down
hsa-let-7f-1-3p	0.660819	0.00326171	down
hsa-let-7f-5p	0.703084	0.0354883	down
hsa-let-7f-5p	0.703839	0.0326212	down
hsa-let-7g-5p	0.669551	0.0183321	down
hsa-miR-103a-3p	0.718222	0.037604	down
hsa-miR-103a-3p	0.719799	0.0396165	down
hsa-miR-1180-3p	0.686275	0.0269973	down
hsa-miR-1268a	0.594595	0.0174576	down
hsa-miR-1273h-3p	0.347072	0.0268233	down
hsa-miR-1273h-5p	0.374046	0.0398541	down
hsa-miR-128-3p	0.584476	0.0272742	down
hsa-miR-1292-5p	0.76087	0.00147312	down
hsa-miR-1294	0.792453	0.00532813	down
hsa-miR-1301-3p	0.390582	0.0177636	down
hsa-miR-1304-5p	0.594937	0.00750338	down
hsa-miR-1306-5p	0.647887	0.0115161	down
hsa-miR-1307-3p	0.542054	0.0398697	down
hsa-miR-130b-3p	0.676991	0.00012802	down
hsa-miR-15b-3p	0.628059	0.00814168	down
hsa-miR-15b-5p	0.691398	0.0363238	down
hsa-miR-16-2-3p	0.626058	0.00726791	down
hsa-miR-181b-3p	0.650307	0.0281843	down
hsa-miR-181b-5p	0.585552	0.0373316	down
hsa-miR-181b-5p	0.604643	0.049352	down
hsa-miR-185-5p	0.418436	0.00299846	down
hsa-miR-18a-3p	0.663265	0.000912048	down
hsa-miR-191-3p	0.55	0.0124135	down
hsa-miR-191-5p	0.492373	0.00825087	down
hsa-miR-219a-1-3p	0.744681	0.0132356	down
hsa-miR-222-3p	0.528624	0.0242737	down
hsa-miR-2277-5p	0.637931	0.0339921	down
hsa-miR-23b-5p	0.785714	0.00653338	down
hsa-miR-25-5p	0.621528	0.00138361	down
hsa-miR-26a-5p	0.606042	0.021164	down
hsa-miR-26a-5p	0.606086	0.0211	down
hsa-miR-301a-5p	0.758065	0.0423157	down
hsa-miR-30b-3p	0.759259	0.0313757	down
hsa-miR-30c-1-3p	0.603571	0.00199288	down
hsa-miR-30c-5p	0.660578	0.0043504	down
hsa-miR-30c-5p	0.660812	0.00433276	down
hsa-miR-30d-5p	0.584076	0.0191276	down
hsa-miR-3173-5p	0.683333	0.0269653	down
hsa-miR-320a	0.563164	0.0186535	down
hsa-miR-320c	0.503289	0.0127652	down
hsa-miR-326	0.714286	0.039942	down
hsa-miR-328-3p	0.532934	0.015319	down
hsa-miR-330-3p	0.552133	0.0304011	down
hsa-miR-331-5p	0.732824	0.010979	down
hsa-miR-361-5p	0.602518	0.0478765	down
hsa-miR-423-3p	0.549351	0.0284349	down
hsa-miR-425-3p	0.618852	0.00614382	down
hsa-miR-454-5p	0.651429	0.0203647	down
hsa-miR-484	0.4572	0.00303504	down
hsa-miR-5001-3p	0.763636	0.0313757	down
hsa-miR-505-3p	0.537662	0.0349541	down
hsa-miR-574-5p	0.815789	0.0351685	down
hsa-miR-576-3p	0.55102	0.013068	down
hsa-miR-597-3p	0.777778	0.00749043	down
hsa-miR-641	0.754717	0.0172528	down
hsa-miR-652-3p	0.793103	0.0188713	down
hsa-miR-671-3p	0.426202	0.0186061	down
hsa-miR-671-5p	0.369318	0.0386936	down
hsa-miR-6866-5p	0.769231	0.00653338	down
hsa-miR-7-5p	0.371538	0.00212047	down
hsa-miR-7-5p	0.371862	0.00213866	down
hsa-miR-7-5p	0.372036	0.00210375	down
hsa-miR-760	0.705882	0.0375901	down
hsa-miR-766-3p	0.605578	0.0458064	down
hsa-miR-766-5p	0.523077	0.00634045	down
hsa-miR-769-3p	0.723404	0.0100597	down
hsa-miR-769-5p	0.729767	0.0114563	down
hsa-miR-7976	0.744898	0.0218364	down
hsa-miR-877-3p	0.660377	0.012009	down
hsa-miR-92a-3p	0.576976	0.0132286	down
hsa-miR-92a-3p	0.586376	0.00618941	down
hsa-miR-92b-3p	0.448394	0.027158	down
hsa-miR-93-3p	0.660714	0.0357651	down
hsa-miR-941	0.563286	0.0375619	down
hsa-miR-941	0.563286	0.0375619	down
hsa-miR-941	0.563286	0.0375619	down
hsa-miR-941	0.563286	0.0375619	down
hsa-miR-941	0.563286	0.0375619	down
hsa-miR-942-3p	0.672131	0.0205837	down
hsa-miR-942-5p	0.591837	0.0288069	down
hsa-miR-98-5p	0.668996	0.0048849	down
hsa-miR-26a-2-3p	0.647059	0.017133	down
hsa-mir-199a-1	0.630952	0.0152167	down
hsa-mir-199a-2	0.630952	0.0152167	down
hsa-miR-novel-chr12_10302	0.407619	0.00486856	down
hsa-miR-novel-chr17_24567	0.479452	0.00293092	down
hsa-miR-novel-chr19_29383	0.477876	0.0113069	down
hsa-miR-novel-chr3_49039	0.666667	0.00453542	down
hsa-miR-novel-chr3_49958	0.556727	0.0463833	down
hsa-miR-novel-chr3_50649	0.407619	0.00486856	down
hsa-miR-novel-chr5_57286	0.833333	0.0257214	down
hsa-miR-novel-chr5_60058	0.723818	0.028431	down

## Sheet: Table S4
Table S4: GO annotation of the differentially expressed miRNA targets in MDMs infected with HIV-1/HIV-2
Table S4.1: HIV-1 infected MDMs									Table S4.2: HIV-2 infected MDMs
GO.ID	Term	Ontology	Enrichment.Score	p-value	Targeted pathways modulated by up/down regulated miRNAs				GO.ID	Term	Ontology	Enrichment.Score	p-value	Targeted pathways modulated by up/down regulated miRNAs
GO:0010468	regulation of gene expression	Biological process	3.58032	0.000262831	up				GO:0048522	positive regulation of cellular process	Biological process	10.1419	7.21296e-11	up
GO:0010467	gene expression	Biological process	3.13452	0.000733642	up				GO:0009893	positive regulation of metabolic process	Biological process	9.10147	7.9164e-10	up
GO:0010628	positive regulation of gene expression	Biological process	3.0044	0.000989931	up				GO:0045859	regulation of protein kinase activity	Biological process	8.62997	2.3444e-09	up
GO:0009893	positive regulation of metabolic process	Biological process	2.99842	0.00100364	up				GO:0031325	positive regulation of cellular metabolic process	Biological process	8.28324	5.20907e-09	up
GO:0002076	osteoblast development	Biological process	2.93234	0.00116859	up				GO:0048518	positive regulation of biological process	Biological process	8.1246	7.50579e-09	up
GO:0019222	regulation of metabolic process	Biological process	2.84077	0.00144286	up				GO:0051173	positive regulation of nitrogen compound metabolic process	Biological process	8.04059	9.10767e-09	up
GO:0048522	positive regulation of cellular process	Biological process	2.766	0.00171396	up				GO:0006464	cellular protein modification process	Biological process	7.68571	2.062e-08	up
GO:0050855	regulation of B cell receptor signaling pathway	Biological process	2.747	0.00179063	up				GO:0036211	protein modification process	Biological process	7.68571	2.062e-08	up
GO:0080090	regulation of primary metabolic process	Biological process	2.71149	0.00194317	up				GO:0010604	positive regulation of macromolecule metabolic process	Biological process	7.48255	3.29189e-08	up
GO:0009059	macromolecule biosynthetic process	Biological process	2.6514	0.00223154	up				GO:0043412	macromolecule modification	Biological process	7.17069	6.75003e-08	up
GO:0048518	positive regulation of biological process	Biological process	2.63445	0.00232034	up				GO:0051254	positive regulation of RNA metabolic process	Biological process	7.1615	6.89452e-08	up
GO:0009889	regulation of biosynthetic process	Biological process	2.57367	0.0026689	up				GO:0043549	regulation of kinase activity	Biological process	7.12196	7.55169e-08	up
GO:0051171	regulation of nitrogen compound metabolic process	Biological process	2.52311	0.00299837	up				GO:0071900	regulation of protein serine/threonine kinase activity	Biological process	6.99916	1.00194e-07	up
GO:0010604	positive regulation of macromolecule metabolic process	Biological process	2.51513	0.00305398	up				GO:0045893	positive regulation of transcription, DNA-templated	Biological process	6.78081	1.6565e-07	up
GO:0044271	cellular nitrogen compound biosynthetic process	Biological process	2.50832	0.00310228	up				GO:1903508	positive regulation of nucleic acid-templated transcription	Biological process	6.78081	1.6565e-07	up
GO:0034645	cellular macromolecule biosynthetic process	Biological process	2.43582	0.00366591	up				GO:1902680	positive regulation of RNA biosynthetic process	Biological process	6.76687	1.71052e-07	up
GO:1901576	organic substance biosynthetic process	Biological process	2.39418	0.0040348	up				GO:0051338	regulation of transferase activity	Biological process	6.68879	2.04741e-07	up
GO:0019219	regulation of nucleobase-containing compound metabolic process	Biological process	2.32388	0.00474376	up				GO:0045935	positive regulation of nucleobase-containing compound metabolic process	Biological process	6.68329	2.07354e-07	up
GO:0009058	biosynthetic process	Biological process	2.31653	0.00482466	up				GO:0031344	regulation of cell projection organization	Biological process	5.81996	1.5137e-06	up
GO:0060255	regulation of macromolecule metabolic process	Biological process	2.31123	0.00488396	up				GO:0006468	protein phosphorylation	Biological process	5.76313	1.72533e-06	up
GO:0031326	regulation of cellular biosynthetic process	Biological process	2.2905	0.0051227	up				GO:0051174	regulation of phosphorus metabolic process	Biological process	5.67293	2.1236e-06	up
GO:0031328	positive regulation of cellular biosynthetic process	Biological process	2.18795	0.00648706	up				GO:0120035	regulation of plasma membrane bounded cell projection organization	Biological process	5.66206	2.17743e-06	up
GO:0044249	cellular biosynthetic process	Biological process	2.14445	0.00717053	up				GO:0031328	positive regulation of cellular biosynthetic process	Biological process	5.60579	2.47865e-06	up
GO:0009891	positive regulation of biosynthetic process	Biological process	2.13377	0.00734908	up				GO:0019220	regulation of phosphate metabolic process	Biological process	5.60473	2.48465e-06	up
GO:0043170	macromolecule metabolic process	Biological process	2.10782	0.00780158	up				GO:0010628	positive regulation of gene expression	Biological process	5.58906	2.57596e-06	up
GO:0045646	regulation of erythrocyte differentiation	Biological process	2.09355	0.00806208	up				GO:0009891	positive regulation of biosynthetic process	Biological process	5.51904	3.02665e-06	up
GO:0048732	gland development	Biological process	2.03562	0.00921256	up				GO:0007399	nervous system development	Biological process	5.48318	3.28717e-06	up
GO:0045893	positive regulation of transcription, DNA-templated	Biological process	1.99357	0.0101491	up				GO:0051094	positive regulation of developmental process	Biological process	5.43131	3.70413e-06	up
GO:1903508	positive regulation of nucleic acid-templated transcription	Biological process	1.99357	0.0101491	up				GO:0048731	system development	Biological process	5.36775	4.28798e-06	up
GO:1902680	positive regulation of RNA biosynthetic process	Biological process	1.99157	0.010196	up				GO:0043405	regulation of MAP kinase activity	Biological process	5.28762	5.15676e-06	up
GO:0045934	negative regulation of nucleobase-containing compound metabolic process	Biological process	1.9796	0.010481	up				GO:0031399	regulation of protein modification process	Biological process	5.27326	5.33019e-06	up
GO:0010557	positive regulation of macromolecule biosynthetic process	Biological process	1.96268	0.0108973	up				GO:0010557	positive regulation of macromolecule biosynthetic process	Biological process	5.2322	5.85865e-06	up
GO:0071704	organic substance metabolic process	Biological process	1.9504	0.0112099	up				GO:0022603	regulation of anatomical structure morphogenesis	Biological process	5.22608	5.94184e-06	up
GO:0051173	positive regulation of nitrogen compound metabolic process	Biological process	1.94973	0.011227	up				GO:0007267	cell-cell signaling	Biological process	5.20879	6.1832e-06	up
GO:0050854	regulation of antigen receptor-mediated signaling pathway	Biological process	1.94101	0.0114548	up				GO:0007049	cell cycle	Biological process	5.13887	7.26322e-06	up
GO:2000112	regulation of cellular macromolecule biosynthetic process	Biological process	1.91848	0.0120647	up				GO:0045860	positive regulation of protein kinase activity	Biological process	5.11977	7.58982e-06	up
GO:0045935	positive regulation of nucleobase-containing compound metabolic process	Biological process	1.88409	0.013059	up				GO:0018209	peptidyl-serine modification	Biological process	5.00806	9.81601e-06	up
GO:0051865	protein autoubiquitination	Biological process	1.88169	0.0131313	up				GO:0071902	positive regulation of protein serine/threonine kinase activity	Biological process	5.00532	9.87821e-06	up
GO:1901362	organic cyclic compound biosynthetic process	Biological process	1.87655	0.0132876	up				GO:0018193	peptidyl-amino acid modification	Biological process	4.99689	1.00718e-05	up
GO:0048519	negative regulation of biological process	Biological process	1.87055	0.0134726	up				GO:0045597	positive regulation of cell differentiation	Biological process	4.93953	1.1494e-05	up
GO:0034641	cellular nitrogen compound metabolic process	Biological process	1.87017	0.0134845	up				GO:0033554	cellular response to stress	Biological process	4.92598	1.18583e-05	up
GO:0051254	positive regulation of RNA metabolic process	Biological process	1.85269	0.0140383	up				GO:0051301	cell division	Biological process	4.87449	1.3351e-05	up
GO:0008152	metabolic process	Biological process	1.84086	0.0144257	up				GO:0007154	cell communication	Biological process	4.82749	1.48767e-05	up
GO:0051253	negative regulation of RNA metabolic process	Biological process	1.82755	0.0148747	up				GO:0001932	regulation of protein phosphorylation	Biological process	4.81415	1.53408e-05	up
GO:0010556	regulation of macromolecule biosynthetic process	Biological process	1.81674	0.0152496	up				GO:0000278	mitotic cell cycle	Biological process	4.78228	1.65089e-05	up
GO:0031325	positive regulation of cellular metabolic process	Biological process	1.80514	0.0156624	up				GO:0051171	regulation of nitrogen compound metabolic process	Biological process	4.72813	1.87013e-05	up
GO:0009880	embryonic pattern specification	Biological process	1.80044	0.0158329	up				GO:0032502	developmental process	Biological process	4.71403	1.93182e-05	up
GO:0042698	ovulation cycle	Biological process	1.80044	0.0158329	up				GO:0031331	positive regulation of cellular catabolic process	Biological process	4.67566	2.11027e-05	up
GO:0034654	nucleobase-containing compound biosynthetic process	Biological process	1.79386	0.0160744	up				GO:0031323	regulation of cellular metabolic process	Biological process	4.63069	2.34053e-05	up
GO:0032774	RNA biosynthetic process	Biological process	1.76388	0.0172233	up				GO:0018105	peptidyl-serine phosphorylation	Biological process	4.61567	2.42285e-05	up
GO:0048663	neuron fate commitment	Biological process	1.76282	0.0172655	up				GO:0042325	regulation of phosphorylation	Biological process	4.61146	2.44646e-05	up
GO:0016070	RNA metabolic process	Biological process	1.7518	0.0177092	up				GO:0007507	heart development	Biological process	4.57658	2.65106e-05	up
GO:0032024	positive regulation of insulin secretion	Biological process	1.75068	0.0177549	up				GO:0080090	regulation of primary metabolic process	Biological process	4.54594	2.84489e-05	up
GO:0048678	response to axon injury	Biological process	1.75068	0.0177549	up				GO:0051347	positive regulation of transferase activity	Biological process	4.53153	2.9408e-05	up
GO:0006367	transcription initiation from RNA polymerase II promoter	Biological process	1.73052	0.0185985	up				GO:0010769	regulation of cell morphogenesis involved in differentiation	Biological process	4.53003	2.95104e-05	up
GO:0006807	nitrogen compound metabolic process	Biological process	1.72826	0.0186955	up				GO:0019222	regulation of metabolic process	Biological process	4.52511	2.9846e-05	up
GO:0018130	heterocycle biosynthetic process	Biological process	1.72761	0.0187237	up				GO:0033674	positive regulation of kinase activity	Biological process	4.51868	3.02914e-05	up
GO:0045944	positive regulation of transcription by RNA polymerase II	Biological process	1.72436	0.0188643	up				GO:0048589	developmental growth	Biological process	4.51111	3.0824e-05	up
GO:0019438	aromatic compound biosynthetic process	Biological process	1.7192	0.0190899	up				GO:0009896	positive regulation of catabolic process	Biological process	4.51111	3.08243e-05	up
GO:0051252	regulation of RNA metabolic process	Biological process	1.71463	0.0192918	up				GO:0060255	regulation of macromolecule metabolic process	Biological process	4.50925	3.09563e-05	up
GO:0048513	animal organ development	Biological process	1.70662	0.0196506	up				GO:0010770	positive regulation of cell morphogenesis involved in differentiation	Biological process	4.41159	3.87623e-05	up
GO:0043401	steroid hormone mediated signaling pathway	Biological process	1.70642	0.0196597	up				GO:0010647	positive regulation of cell communication	Biological process	4.38054	4.16353e-05	up
GO:0007417	central nervous system development	Biological process	1.68355	0.020723	up				GO:0023052	signaling	Biological process	4.36092	4.35593e-05	up
GO:0006355	regulation of transcription, DNA-templated	Biological process	1.66449	0.0216526	up				GO:0007167	enzyme linked receptor protein signaling pathway	Biological process	4.36026	4.36255e-05	up
GO:1903506	regulation of nucleic acid-templated transcription	Biological process	1.6412	0.0228457	up				GO:0045944	positive regulation of transcription by RNA polymerase II	Biological process	4.33016	4.67568e-05	up
GO:0030802	regulation of cyclic nucleotide biosynthetic process	Biological process	1.63893	0.022965	up				GO:0051641	cellular localization	Biological process	4.32974	4.68011e-05	up
GO:0043407	negative regulation of MAP kinase activity	Biological process	1.63893	0.022965	up				GO:0023056	positive regulation of signaling	Biological process	4.3218	4.76653e-05	up
GO:0045892	negative regulation of transcription, DNA-templated	Biological process	1.63545	0.0231499	up				GO:0008284	positive regulation of cell proliferation	Biological process	4.31829	4.80519e-05	up
GO:2001141	regulation of RNA biosynthetic process	Biological process	1.63239	0.0233136	up				GO:0006357	regulation of transcription by RNA polymerase II	Biological process	4.29572	5.06151e-05	up
GO:0001649	osteoblast differentiation	Biological process	1.62646	0.0236343	up				GO:0031329	regulation of cellular catabolic process	Biological process	4.29495	5.07054e-05	up
GO:1904894	positive regulation of STAT cascade	Biological process	1.59852	0.0252048	up				GO:0043406	positive regulation of MAP kinase activity	Biological process	4.28301	5.21183e-05	up
GO:0044238	primary metabolic process	Biological process	1.59655	0.0253193	up				GO:0032268	regulation of cellular protein metabolic process	Biological process	4.26491	5.43359e-05	up
GO:0071396	cellular response to lipid	Biological process	1.56002	0.0275413	up				GO:1903506	regulation of nucleic acid-templated transcription	Biological process	4.23502	5.8207e-05	up
GO:0060021	roof of mouth development	Biological process	1.55091	0.0281245	up				GO:0051252	regulation of RNA metabolic process	Biological process	4.19217	6.42437e-05	up
GO:0090304	nucleic acid metabolic process	Biological process	1.54735	0.0283562	up				GO:2001141	regulation of RNA biosynthetic process	Biological process	4.1809	6.59332e-05	up
GO:1903507	negative regulation of nucleic acid-templated transcription	Biological process	1.54403	0.028574	up				GO:0009967	positive regulation of signal transduction	Biological process	4.17582	6.67078e-05	up
GO:1902679	negative regulation of RNA biosynthetic process	Biological process	1.54034	0.0288178	up				GO:0072359	circulatory system development	Biological process	4.16213	6.88443e-05	up
GO:0009792	embryo development ending in birth or egg hatching	Biological process	1.53454	0.0292053	up				GO:0031401	positive regulation of protein modification process	Biological process	4.15432	7.00935e-05	up
GO:0007193	adenylate cyclase-inhibiting G-protein coupled receptor signaling pathway	Biological process	1.53271	0.0293288	up				GO:0099175	regulation of postsynapse organization	Biological process	4.13863	7.26728e-05	up
GO:0006991	response to sterol depletion	Biological process	1.52829	0.0296283	up				GO:0006366	transcription by RNA polymerase II	Biological process	4.1121	7.72497e-05	up
GO:0021877	forebrain neuron fate commitment	Biological process	1.52829	0.0296283	up				GO:0097061	dendritic spine organization	Biological process	4.11122	7.74078e-05	up
GO:0033089	positive regulation of T cell differentiation in thymus	Biological process	1.52829	0.0296283	up				GO:0000082	G1/S transition of mitotic cell cycle	Biological process	4.07572	8.39999e-05	up
GO:0044557	relaxation of smooth muscle	Biological process	1.52829	0.0296283	up				GO:0010975	regulation of neuron projection development	Biological process	4.06648	8.58061e-05	up
GO:0097048	dendritic cell apoptotic process	Biological process	1.52829	0.0296283	up				GO:0006355	regulation of transcription, DNA-templated	Biological process	4.0609	8.6917e-05	up
GO:0098734	macromolecule depalmitoylation	Biological process	1.52829	0.0296283	up				GO:0008283	cell proliferation	Biological process	4.05371	8.83672e-05	up
GO:1902950	regulation of dendritic spine maintenance	Biological process	1.52829	0.0296283	up				GO:0050770	regulation of axonogenesis	Biological process	4.02897	9.35477e-05	up
GO:1904896	ESCRT complex disassembly	Biological process	1.52829	0.0296283	up				GO:0044843	cell cycle G1/S phase transition	Biological process	4.01831	9.58724e-05	up
GO:1904903	ESCRT III complex disassembly	Biological process	1.52829	0.0296283	up				GO:0040007	growth	Biological process	4.01738	9.60765e-05	up
GO:1904996	positive regulation of leukocyte adhesion to vascular endothelial cell	Biological process	1.52829	0.0296283	up				GO:0006469	negative regulation of protein kinase activity	Biological process	3.98652	0.000103152	up
GO:2000668	regulation of dendritic cell apoptotic process	Biological process	1.52829	0.0296283	up				GO:1903362	regulation of cellular protein catabolic process	Biological process	3.97207	0.000106641	up
GO:1903039	positive regulation of leukocyte cell-cell adhesion	Biological process	1.52758	0.0296767	up				GO:0019219	regulation of nucleobase-containing compound metabolic process	Biological process	3.96367	0.000108725	up
GO:0006139	nucleobase-containing compound metabolic process	Biological process	1.52567	0.0298081	up				GO:0106027	neuron projection organization	Biological process	3.94113	0.000114516	up
GO:1901137	carbohydrate derivative biosynthetic process	Biological process	1.52531	0.0298322	up				GO:0034613	cellular protein localization	Biological process	3.93734	0.00011552	up
GO:0045785	positive regulation of cell adhesion	Biological process	1.52481	0.0298672	up				GO:0050793	regulation of developmental process	Biological process	3.93211	0.000116921	up
GO:0044260	cellular macromolecule metabolic process	Biological process	1.52193	0.0300654	up				GO:0006796	phosphate-containing compound metabolic process	Biological process	3.90254	0.000125159	up
GO:0090277	positive regulation of peptide hormone secretion	Biological process	1.50622	0.0311734	up				GO:0007275	multicellular organism development	Biological process	3.90157	0.000125439	up
GO:0042100	B cell proliferation	Biological process	1.4976	0.0317983	up				GO:0000289	nuclear-transcribed mRNA poly(A) tail shortening	Biological process	3.88614	0.000129974	up
GO:0048704	embryonic skeletal system morphogenesis	Biological process	1.4976	0.0317983	up				GO:0016310	phosphorylation	Biological process	3.87701	0.000132737	up
GO:0010647	positive regulation of cell communication	Biological process	1.49476	0.0320063	up				GO:0006793	phosphorus metabolic process	Biological process	3.87487	0.000133393	up
GO:0006351	transcription, DNA-templated	Biological process	1.49145	0.0322515	up				GO:0072657	protein localization to membrane	Biological process	3.85836	0.000138559	up
GO:0035282	segmentation	Biological process	1.48908	0.0324282	up				GO:0070727	cellular macromolecule localization	Biological process	3.8464	0.000142431	up
GO:0001821	histamine secretion	Biological process	1.48754	0.0325433	up				GO:0010646	regulation of cell communication	Biological process	3.83057	0.000147717	up
GO:0006853	carnitine shuttle	Biological process	1.48754	0.0325433	up				GO:0022402	cell cycle process	Biological process	3.8203	0.000151251	up
GO:0009048	dosage compensation by inactivation of X chromosome	Biological process	1.48754	0.0325433	up				GO:0045936	negative regulation of phosphate metabolic process	Biological process	3.81023	0.000154799	up
GO:0030575	nuclear body organization	Biological process	1.48754	0.0325433	up				GO:0007169	transmembrane receptor protein tyrosine kinase signaling pathway	Biological process	3.8076	0.000155742	up
GO:0045793	positive regulation of cell size	Biological process	1.48754	0.0325433	up				GO:0010563	negative regulation of phosphorus metabolic process	Biological process	3.79476	0.000160413	up
GO:0045919	positive regulation of cytolysis	Biological process	1.48754	0.0325433	up				GO:0048856	anatomical structure development	Biological process	3.79088	0.000161853	up
GO:0071372	cellular response to follicle-stimulating hormone stimulus	Biological process	1.48754	0.0325433	up				GO:0023051	regulation of signaling	Biological process	3.79028	0.000162075	up
GO:0023056	positive regulation of signaling	Biological process	1.48578	0.0326756	up				GO:0099173	postsynapse organization	Biological process	3.78476	0.00016415	up
GO:0002697	regulation of immune effector process	Biological process	1.48018	0.0330995	up				GO:0048638	regulation of developmental growth	Biological process	3.76676	0.000171095	up
GO:0009755	hormone-mediated signaling pathway	Biological process	1.47944	0.0331555	up				GO:0045595	regulation of cell differentiation	Biological process	3.74916	0.000178173	up
GO:0097659	nucleic acid-templated transcription	Biological process	1.47416	0.0335617	up				GO:0032270	positive regulation of cellular protein metabolic process	Biological process	3.72879	0.000186729	up
GO:0031668	cellular response to extracellular stimulus	Biological process	1.46548	0.0342391	up				GO:0032774	RNA biosynthetic process	Biological process	3.71759	0.000191606	up
GO:0050853	B cell receptor signaling pathway	Biological process	1.46411	0.0343471	up				GO:0051546	keratinocyte migration	Biological process	3.71645	0.000192111	up
GO:0048872	homeostasis of number of cells	Biological process	1.46087	0.0346044	up				GO:0010562	positive regulation of phosphorus metabolic process	Biological process	3.68299	0.000207494	up
GO:0050714	positive regulation of protein secretion	Biological process	1.46087	0.0346044	up				GO:0045937	positive regulation of phosphate metabolic process	Biological process	3.68299	0.000207494	up
GO:0050727	regulation of inflammatory response	Biological process	1.46019	0.0346583	up				GO:0070848	response to growth factor	Biological process	3.67126	0.000213178	up
GO:0048523	negative regulation of cellular process	Biological process	1.45952	0.0347118	up				GO:0097659	nucleic acid-templated transcription	Biological process	3.67012	0.000213737	up
GO:0009100	glycoprotein metabolic process	Biological process	1.45361	0.0351873	up				GO:0040008	regulation of growth	Biological process	3.66972	0.000213932	up
GO:0033197	response to vitamin E	Biological process	1.45039	0.0354497	up				GO:0001933	negative regulation of protein phosphorylation	Biological process	3.66697	0.000215291	up
GO:0051608	histamine transport	Biological process	1.45039	0.0354497	up				GO:0001944	vasculature development	Biological process	3.66067	0.000218439	up
GO:0060707	trophoblast giant cell differentiation	Biological process	1.45039	0.0354497	up				GO:0051247	positive regulation of protein metabolic process	Biological process	3.65147	0.000223114	up
GO:0060736	prostate gland growth	Biological process	1.45039	0.0354497	up				GO:0044267	cellular protein metabolic process	Biological process	3.64699	0.000225429	up
GO:1900363	regulation of mRNA polyadenylation	Biological process	1.45039	0.0354497	up				GO:0006351	transcription, DNA-templated	Biological process	3.62902	0.000234953	up
GO:1902993	positive regulation of amyloid precursor protein catabolic process	Biological process	1.45039	0.0354497	up				GO:0072358	cardiovascular system development	Biological process	3.55414	0.000279161	up
GO:2000052	positive regulation of non-canonical Wnt signaling pathway	Biological process	1.45039	0.0354497	up				GO:0009966	regulation of signal transduction	Biological process	3.54674	0.000283965	up
GO:1901360	organic cyclic compound metabolic process	Biological process	1.42759	0.0373603	up				GO:0050772	positive regulation of axonogenesis	Biological process	3.53109	0.000294379	up
GO:0006352	DNA-templated transcription, initiation	Biological process	1.42481	0.0375999	up				GO:0009894	regulation of catabolic process	Biological process	3.51003	0.00030901	up
GO:0052652	cyclic purine nucleotide metabolic process	Biological process	1.41664	0.0383143	up				GO:0031346	positive regulation of cell projection organization	Biological process	3.50695	0.000311205	up
GO:0007549	dosage compensation	Biological process	1.41626	0.0383476	up				GO:0033673	negative regulation of kinase activity	Biological process	3.50531	0.000312388	up
GO:0009642	response to light intensity	Biological process	1.41626	0.0383476	up				GO:0071363	cellular response to growth factor stimulus	Biological process	3.49866	0.000317207	up
GO:0034134	toll-like receptor 2 signaling pathway	Biological process	1.41626	0.0383476	up				GO:1903050	regulation of proteolysis involved in cellular protein catabolic process	Biological process	3.47001	0.000338838	up
GO:0035372	protein localization to microtubule	Biological process	1.41626	0.0383476	up				GO:0072659	protein localization to plasma membrane	Biological process	3.46426	0.000343351	up
GO:0060123	regulation of growth hormone secretion	Biological process	1.41626	0.0383476	up				GO:0008104	protein localization	Biological process	3.45397	0.000351587	up
GO:0060252	positive regulation of glial cell proliferation	Biological process	1.41626	0.0383476	up				GO:0045664	regulation of neuron differentiation	Biological process	3.43915	0.000363789	up
GO:0060452	positive regulation of cardiac muscle contraction	Biological process	1.41626	0.0383476	up				GO:0051128	regulation of cellular component organization	Biological process	3.43176	0.000370033	up
GO:0071397	cellular response to cholesterol	Biological process	1.41626	0.0383476	up				GO:0061061	muscle structure development	Biological process	3.42467	0.000376121	up
GO:0086103	G-protein coupled receptor signaling pathway involved in heart process	Biological process	1.41626	0.0383476	up				GO:0022604	regulation of cell morphogenesis	Biological process	3.41364	0.000385802	up
GO:2000095	regulation of Wnt signaling pathway, planar cell polarity pathway	Biological process	1.41626	0.0383476	up				GO:0051547	regulation of keratinocyte migration	Biological process	3.40015	0.000397973	up
GO:0050708	regulation of protein secretion	Biological process	1.41183	0.0387413	up				GO:0035265	organ growth	Biological process	3.38838	0.000408905	up
GO:0009190	cyclic nucleotide biosynthetic process	Biological process	1.40903	0.0389919	up				GO:0051726	regulation of cell cycle	Biological process	3.37675	0.000419996	up
GO:0030799	regulation of cyclic nucleotide metabolic process	Biological process	1.40903	0.0389919	up				GO:0051246	regulation of protein metabolic process	Biological process	3.36779	0.000428751	up
GO:0048584	positive regulation of response to stimulus	Biological process	1.38684	0.0410358	up				GO:0035556	intracellular signal transduction	Biological process	3.36593	0.000430592	up
GO:0006024	glycosaminoglycan biosynthetic process	Biological process	1.38667	0.0410521	up				GO:0050794	regulation of cellular process	Biological process	3.35597	0.000440586	up
GO:0030218	erythrocyte differentiation	Biological process	1.38667	0.0410521	up				GO:0006511	ubiquitin-dependent protein catabolic process	Biological process	3.34495	0.000451908	up
GO:0030449	regulation of complement activation	Biological process	1.38667	0.0410521	up				GO:0007156	homophilic cell adhesion via plasma membrane adhesion molecules	Biological process	3.33962	0.000457486	up
GO:0006957	complement activation, alternative pathway	Biological process	1.38471	0.0412369	up				GO:0042326	negative regulation of phosphorylation	Biological process	3.33069	0.000466996	up
GO:0007512	adult heart development	Biological process	1.38471	0.0412369	up				GO:2000058	regulation of ubiquitin-dependent protein catabolic process	Biological process	3.3283	0.000469569	up
GO:0009313	oligosaccharide catabolic process	Biological process	1.38471	0.0412369	up				GO:0051348	negative regulation of transferase activity	Biological process	3.31942	0.000479274	up
GO:0016114	terpenoid biosynthetic process	Biological process	1.38471	0.0412369	up				GO:0061001	regulation of dendritic spine morphogenesis	Biological process	3.30875	0.000491186	up
GO:0035729	cellular response to hepatocyte growth factor stimulus	Biological process	1.38471	0.0412369	up				GO:0016236	macroautophagy	Biological process	3.28631	0.000517237	up
GO:0042159	lipoprotein catabolic process	Biological process	1.38471	0.0412369	up				GO:0048666	neuron development	Biological process	3.26677	0.000541047	up
GO:0044849	estrous cycle	Biological process	1.38471	0.0412369	up				GO:0050789	regulation of biological process	Biological process	3.26398	0.000544524	up
GO:0060712	spongiotrophoblast layer development	Biological process	1.38471	0.0412369	up				GO:0010976	positive regulation of neuron projection development	Biological process	3.24873	0.000563991	up
GO:0046483	heterocycle metabolic process	Biological process	1.38106	0.0415854	up				GO:1903047	mitotic cell cycle process	Biological process	3.24547	0.000568234	up
GO:2000257	regulation of protein activation cascade	Biological process	1.37937	0.0417478	up				GO:0002090	regulation of receptor internalization	Biological process	3.235	0.000582108	up
GO:0031323	regulation of cellular metabolic process	Biological process	1.3782	0.0418599	up				GO:0031098	stress-activated protein kinase signaling cascade	Biological process	3.2232	0.00059814	up
GO:0022409	positive regulation of cell-cell adhesion	Biological process	1.37748	0.0419298	up				GO:0060211	regulation of nuclear-transcribed mRNA poly(A) tail shortening	Biological process	3.21742	0.000606149	up
GO:0061061	muscle structure development	Biological process	1.37252	0.0424114	up				GO:0060213	positive regulation of nuclear-transcribed mRNA poly(A) tail shortening	Biological process	3.21742	0.000606149	up
GO:0006721	terpenoid metabolic process	Biological process	1.37214	0.042448	up				GO:0016070	RNA metabolic process	Biological process	3.20748	0.000620178	up
GO:0002793	positive regulation of peptide secretion	Biological process	1.36913	0.0427431	up				GO:0001568	blood vessel development	Biological process	3.20392	0.000625291	up
GO:0060071	Wnt signaling pathway, planar cell polarity pathway	Biological process	1.36499	0.0431526	up				GO:0019941	modification-dependent protein catabolic process	Biological process	3.20123	0.000629171	up
GO:0071383	cellular response to steroid hormone stimulus	Biological process	1.36499	0.0431527	up				GO:1990090	cellular response to nerve growth factor stimulus	Biological process	3.19111	0.000644007	up
GO:0001911	negative regulation of leukocyte mediated cytotoxicity	Biological process	1.35539	0.0441177	up				GO:1905475	regulation of protein localization to membrane	Biological process	3.19019	0.000645376	up
GO:0007351	tripartite regional subdivision	Biological process	1.35539	0.0441177	up				GO:2000026	regulation of multicellular organismal development	Biological process	3.17684	0.000665522	up
GO:0008595	anterior/posterior axis specification, embryo	Biological process	1.35539	0.0441177	up				GO:0010771	negative regulation of cell morphogenesis involved in differentiation	Biological process	3.17425	0.0006695	up
GO:0010715	regulation of extracellular matrix disassembly	Biological process	1.35539	0.0441177	up				GO:0008361	regulation of cell size	Biological process	3.16117	0.000689968	up
GO:0034616	response to laminar fluid shear stress	Biological process	1.35539	0.0441177	up				GO:0031400	negative regulation of protein modification process	Biological process	3.15913	0.000693214	up
GO:0060026	convergent extension	Biological process	1.35539	0.0441177	up				GO:0010256	endomembrane system organization	Biological process	3.1581	0.000694865	up
GO:0060397	JAK-STAT cascade involved in growth hormone signaling pathway	Biological process	1.35539	0.0441177	up				GO:0060996	dendritic spine development	Biological process	3.13286	0.000736436	up
GO:1904262	negative regulation of TORC1 signaling	Biological process	1.35539	0.0441177	up				GO:0060997	dendritic spine morphogenesis	Biological process	3.13185	0.000738152	up
GO:0090175	regulation of establishment of planar polarity	Biological process	1.35091	0.044575	up				GO:0009057	macromolecule catabolic process	Biological process	3.11709	0.000763677	up
GO:0006725	cellular aromatic compound metabolic process	Biological process	1.34667	0.0450126	up				GO:1990778	protein localization to cell periphery	Biological process	3.11613	0.000765359	up
GO:0006486	protein glycosylation	Biological process	1.34457	0.0452307	up				GO:0048732	gland development	Biological process	3.10811	0.000779637	up
GO:0043413	macromolecule glycosylation	Biological process	1.34457	0.0452307	up				GO:0009653	anatomical structure morphogenesis	Biological process	3.10684	0.000781918	up
GO:0006023	aminoglycan biosynthetic process	Biological process	1.34397	0.0452928	up				GO:0070647	protein modification by small protein conjugation or removal	Biological process	3.09479	0.000803918	up
GO:0010595	positive regulation of endothelial cell migration	Biological process	1.3371	0.0460148	up				GO:0050790	regulation of catalytic activity	Biological process	3.08641	0.000819571	up
GO:0034101	erythrocyte homeostasis	Biological process	1.3303	0.0467411	up				GO:0043632	modification-dependent macromolecule catabolic process	Biological process	3.07631	0.000838859	up
GO:0006474	N-terminal protein amino acid acetylation	Biological process	1.32799	0.04699	up				GO:0031345	negative regulation of cell projection organization	Biological process	3.0758	0.000839854	up
GO:0030252	growth hormone secretion	Biological process	1.32799	0.04699	up				GO:0050773	regulation of dendrite development	Biological process	3.06321	0.000864546	up
GO:0030889	negative regulation of B cell proliferation	Biological process	1.32799	0.04699	up				GO:0019538	protein metabolic process	Biological process	3.05821	0.000874554	up
GO:0033033	negative regulation of myeloid cell apoptotic process	Biological process	1.32799	0.04699	up				GO:0060537	muscle tissue development	Biological process	3.04975	0.000891766	up
GO:0035728	response to hepatocyte growth factor	Biological process	1.32799	0.04699	up				GO:0001889	liver development	Biological process	3.03184	0.000929304	up
GO:0035970	peptidyl-threonine dephosphorylation	Biological process	1.32799	0.04699	up				GO:0031175	neuron projection development	Biological process	3.02661	0.000940566	up
GO:0042268	regulation of cytolysis	Biological process	1.32799	0.04699	up				GO:1990089	response to nerve growth factor	Biological process	3.01791	0.000959602	up
GO:0043584	nose development	Biological process	1.32799	0.04699	up				GO:0045666	positive regulation of neuron differentiation	Biological process	3.00672	0.000984641	up
GO:0045986	negative regulation of smooth muscle contraction	Biological process	1.32799	0.04699	up				GO:0010977	negative regulation of neuron projection development	Biological process	3.00083	0.000998098	up
GO:0045989	positive regulation of striated muscle contraction	Biological process	1.32799	0.04699	up				GO:0030030	cell projection organization	Biological process	2.98225	0.00104172	up
GO:0048535	lymph node development	Biological process	1.32799	0.04699	up				GO:0030182	neuron differentiation	Biological process	2.97836	0.0010511	up
GO:0060192	negative regulation of lipase activity	Biological process	1.32799	0.04699	up				GO:0060284	regulation of cell development	Biological process	2.96959	0.00107254	up
GO:1902001	fatty acid transmembrane transport	Biological process	1.32799	0.04699	up				GO:0033363	secretory granule organization	Biological process	2.96008	0.00109627	up
GO:0002791	regulation of peptide secretion	Biological process	1.3243	0.0473919	up				GO:0048646	anatomical structure formation involved in morphogenesis	Biological process	2.95787	0.00110188	up
GO:0070085	glycosylation	Biological process	1.30896	0.0490952	up				GO:0048523	negative regulation of cellular process	Biological process	2.95697	0.00110415	up
GO:0000920	cell separation after cytokinesis	Biological process	1.3023	0.0498539	up				GO:0048584	positive regulation of response to stimulus	Biological process	2.95447	0.00111053	up
GO:0002710	negative regulation of T cell mediated immunity	Biological process	1.3023	0.0498539	up				GO:0016050	vesicle organization	Biological process	2.94864	0.00112553	up
GO:0032354	response to follicle-stimulating hormone	Biological process	1.3023	0.0498539	up				GO:0032147	activation of protein kinase activity	Biological process	2.94645	0.00113124	up
GO:0034143	regulation of toll-like receptor 4 signaling pathway	Biological process	1.3023	0.0498539	up				GO:0048514	blood vessel morphogenesis	Biological process	2.94275	0.0011409	up
GO:0036315	cellular response to sterol	Biological process	1.3023	0.0498539	up				GO:0048583	regulation of response to stimulus	Biological process	2.94183	0.00114333	up
GO:0038092	nodal signaling pathway	Biological process	1.3023	0.0498539	up				GO:0061008	hepaticobiliary system development	Biological process	2.93984	0.00114858	up
GO:0043951	negative regulation of cAMP-mediated signaling	Biological process	1.3023	0.0498539	up				GO:0072073	kidney epithelium development	Biological process	2.93984	0.00114858	up
GO:0055119	relaxation of cardiac muscle	Biological process	1.3023	0.0498539	up				GO:0000910	cytokinesis	Biological process	2.93888	0.00115113	up
GO:0006366	transcription by RNA polymerase II	Biological process	1.30172	0.0499208	up				GO:0051130	positive regulation of cellular component organization	Biological process	2.9378	0.00115399	up
GO:0048511	rhythmic process	Biological process	1.30124	0.0499755	up				GO:0061136	regulation of proteasomal protein catabolic process	Biological process	2.91227	0.00122386	up
GO:0044428	nuclear part	Cellular component	2.91914	0.00120464	up				GO:0042659	regulation of cell fate specification	Biological process	2.90871	0.00123393	up
GO:0019897	extrinsic component of plasma membrane	Cellular component	2.76627	0.00171289	up				GO:0065007	biological regulation	Biological process	2.90818	0.00123542	up
GO:0009898	cytoplasmic side of plasma membrane	Cellular component	2.72056	0.00190301	up				GO:0060998	regulation of dendritic spine development	Biological process	2.90612	0.0012413	up
GO:0098562	cytoplasmic side of membrane	Cellular component	2.5275	0.00296827	up				GO:0001934	positive regulation of protein phosphorylation	Biological process	2.90109	0.00125578	up
GO:0098552	side of membrane	Cellular component	2.39216	0.00405359	up				GO:0031326	regulation of cellular biosynthetic process	Biological process	2.88949	0.00128977	up
GO:0031234	extrinsic component of cytoplasmic side of plasma membrane	Cellular component	2.35865	0.00437873	up				GO:0045927	positive regulation of growth	Biological process	2.87128	0.001345	up
GO:0031981	nuclear lumen	Cellular component	2.27392	0.0053221	up				GO:0048519	negative regulation of biological process	Biological process	2.87036	0.00134784	up
GO:0098805	whole membrane	Cellular component	2.08861	0.00815442	up				GO:0010468	regulation of gene expression	Biological process	2.81999	0.00151361	up
GO:0005634	nucleus	Cellular component	2.04882	0.00893666	up				GO:0001525	angiogenesis	Biological process	2.80021	0.00158413	up
GO:0005654	nucleoplasm	Cellular component	1.98263	0.0104081	up				GO:0009889	regulation of biosynthetic process	Biological process	2.79796	0.00159236	up
GO:0031974	membrane-enclosed lumen	Cellular component	1.97241	0.010656	up				GO:0042176	regulation of protein catabolic process	Biological process	2.7937	0.00160804	up
GO:0043233	organelle lumen	Cellular component	1.97241	0.010656	up				GO:0048639	positive regulation of developmental growth	Biological process	2.78293	0.00164842	up
GO:0070013	intracellular organelle lumen	Cellular component	1.97241	0.010656	up				GO:0051172	negative regulation of nitrogen compound metabolic process	Biological process	2.7822	0.0016512	up
GO:0019898	extrinsic component of membrane	Cellular component	1.9611	0.010937	up				GO:0048869	cellular developmental process	Biological process	2.77831	0.00166604	up
GO:0000323	lytic vacuole	Cellular component	1.82372	0.0150064	up				GO:0016482	cytosolic transport	Biological process	2.76483	0.00171859	up
GO:0005764	lysosome	Cellular component	1.82372	0.0150064	up				GO:0007166	cell surface receptor signaling pathway	Biological process	2.7536	0.00176358	up
GO:0005667	transcription factor complex	Cellular component	1.70513	0.0197182	up				GO:0032535	regulation of cellular component size	Biological process	2.74262	0.00180875	up
GO:0044422	organelle part	Cellular component	1.68357	0.0207219	up				GO:0043410	positive regulation of MAPK cascade	Biological process	2.73518	0.00184001	up
GO:0044446	intracellular organelle part	Cellular component	1.60298	0.0249472	up				GO:0006479	protein methylation	Biological process	2.73287	0.00184982	up
GO:1902554	serine/threonine protein kinase complex	Cellular component	1.57124	0.0268386	up				GO:0008213	protein alkylation	Biological process	2.73287	0.00184982	up
GO:0005773	vacuole	Cellular component	1.56025	0.0275267	up				GO:0043408	regulation of MAPK cascade	Biological process	2.71069	0.00194673	up
GO:0044437	vacuolar part	Cellular component	1.55626	0.0277802	up				GO:0120036	plasma membrane bounded cell projection organization	Biological process	2.70908	0.00195399	up
GO:0031414	N-terminal protein acetyltransferase complex	Cellular component	1.52935	0.0295563	up				GO:0014706	striated muscle tissue development	Biological process	2.70675	0.00196447	up
GO:0043202	lysosomal lumen	Cellular component	1.48231	0.0329377	up				GO:0033036	macromolecule localization	Biological process	2.69884	0.00200059	up
GO:0005774	vacuolar membrane	Cellular component	1.45238	0.0352876	up				GO:0042327	positive regulation of phosphorylation	Biological process	2.69677	0.00201014	up
GO:0000815	ESCRT III complex	Cellular component	1.45144	0.0353638	up				GO:0060795	cell fate commitment involved in formation of primary germ layer	Biological process	2.67414	0.00211769	up
GO:0032797	SMN complex	Cellular component	1.45144	0.0353638	up				GO:0008219	cell death	Biological process	2.67199	0.00212819	up
GO:0097504	Gemini of coiled bodies	Cellular component	1.45144	0.0353638	up				GO:0098609	cell-cell adhesion	Biological process	2.66352	0.00217008	up
GO:1902911	protein kinase complex	Cellular component	1.44958	0.0355158	up				GO:0051603	proteolysis involved in cellular protein catabolic process	Biological process	2.66155	0.00217995	up
GO:0005840	ribosome	Cellular component	1.4446	0.0359254	up				GO:0033043	regulation of organelle organization	Biological process	2.65353	0.00222061	up
GO:0005675	holo TFIIH complex	Cellular component	1.41732	0.0382547	up				GO:0032482	Rab protein signal transduction	Biological process	2.645	0.00226464	up
GO:0042588	zymogen granule	Cellular component	1.41732	0.0382547	up				GO:0032434	regulation of proteasomal ubiquitin-dependent protein catabolic process	Biological process	2.62853	0.00235215	up
GO:0044445	cytosolic part	Cellular component	1.38784	0.0409414	up				GO:0032446	protein modification by small protein conjugation	Biological process	2.59174	0.0025601	up
GO:0000800	lateral element	Cellular component	1.32905	0.0468765	up				GO:0048699	generation of neurons	Biological process	2.58846	0.00257954	up
GO:0034045	phagophore assembly site membrane	Cellular component	1.32905	0.0468765	up				GO:0046620	regulation of organ growth	Biological process	2.58338	0.0026099	up
GO:0005635	nuclear envelope	Cellular component	1.32636	0.0471669	up				GO:0048738	cardiac muscle tissue development	Biological process	2.58029	0.00262851	up
GO:0008074	guanylate cyclase complex, soluble	Cellular component	1.30335	0.0497335	up				GO:0010720	positive regulation of cell development	Biological process	2.58016	0.00262928	up
GO:0032433	filopodium tip	Cellular component	1.30335	0.0497335	up				GO:0016239	positive regulation of macroautophagy	Biological process	2.56955	0.00269435	up
GO:0000982	transcription factor activity, RNA polymerase II proximal promoter sequence-specific DNA binding	Molecular function	2.90798	0.001236	up				GO:0050771	negative regulation of axonogenesis	Biological process	2.56955	0.00269435	up
GO:0001077	transcriptional activator activity, RNA polymerase II proximal promoter sequence-specific DNA binding	Molecular function	2.89731	0.00126674	up				GO:0048513	animal organ development	Biological process	2.56863	0.00270006	up
GO:0043395	heparan sulfate proteoglycan binding	Molecular function	2.81768	0.00152167	up				GO:0044772	mitotic cell cycle phase transition	Biological process	2.56642	0.0027138	up
GO:0000978	RNA polymerase II proximal promoter sequence-specific DNA binding	Molecular function	2.79865	0.00158984	up				GO:0086010	membrane depolarization during action potential	Biological process	2.56275	0.00273685	up
GO:0000987	proximal promoter sequence-specific DNA binding	Molecular function	2.72433	0.00188655	up				GO:0006915	apoptotic process	Biological process	2.56263	0.00273761	up
GO:0035035	histone acetyltransferase binding	Molecular function	2.49516	0.00319771	up				GO:0043414	macromolecule methylation	Biological process	2.56256	0.00273801	up
GO:0019904	protein domain specific binding	Molecular function	2.41351	0.00385915	up				GO:0044770	cell cycle phase transition	Biological process	2.55944	0.00275777	up
GO:0043394	proteoglycan binding	Molecular function	2.26397	0.00544537	up				GO:0031398	positive regulation of protein ubiquitination	Biological process	2.55094	0.00281231	up
GO:0001228	transcriptional activator activity, RNA polymerase II transcription regulatory region sequence-specific DNA binding	Molecular function	2.14962	0.00708571	up				GO:0044257	cellular protein catabolic process	Biological process	2.55047	0.00281532	up
GO:0000977	RNA polymerase II regulatory region sequence-specific DNA binding	Molecular function	1.92084	0.0119994	up				GO:0001649	osteoblast differentiation	Biological process	2.54803	0.00283122	up
GO:0001012	RNA polymerase II regulatory region DNA binding	Molecular function	1.91187	0.0122498	up				GO:0055024	regulation of cardiac muscle tissue development	Biological process	2.54752	0.00283451	up
GO:0005515	protein binding	Molecular function	1.75415	0.0176138	up				GO:1900151	regulation of nuclear-transcribed mRNA catabolic process, deadenylation-dependent decay	Biological process	2.54343	0.00286137	up
GO:0000976	transcription regulatory region sequence-specific DNA binding	Molecular function	1.70378	0.0197799	up				GO:1900153	positive regulation of nuclear-transcribed mRNA catabolic process, deadenylation-dependent decay	Biological process	2.54343	0.00286137	up
GO:1990837	sequence-specific double-stranded DNA binding	Molecular function	1.6138	0.0243331	up				GO:0045814	negative regulation of gene expression, epigenetic	Biological process	2.53865	0.00289299	up
GO:0008474	palmitoyl-(protein) hydrolase activity	Molecular function	1.54222	0.0286932	up				GO:0050767	regulation of neurogenesis	Biological process	2.52855	0.00296111	up
GO:0098599	palmitoyl hydrolase activity	Molecular function	1.54222	0.0286932	up				GO:2000112	regulation of cellular macromolecule biosynthetic process	Biological process	2.51895	0.00302726	up
GO:0004596	peptide alpha-N-acetyltransferase activity	Molecular function	1.50144	0.0315178	up				GO:0050769	positive regulation of neurogenesis	Biological process	2.51468	0.00305714	up
GO:0042975	peroxisome proliferator activated receptor binding	Molecular function	1.46427	0.0343342	up				GO:0098742	cell-cell adhesion via plasma-membrane adhesion molecules	Biological process	2.51392	0.0030625	up
GO:0003690	double-stranded DNA binding	Molecular function	1.42489	0.0375937	up				GO:0044260	cellular macromolecule metabolic process	Biological process	2.49875	0.00317138	up
GO:0003697	single-stranded DNA binding	Molecular function	1.41235	0.0386949	up				GO:0022610	biological adhesion	Biological process	2.49685	0.00318528	up
GO:0032794	GTPase activating protein binding	Molecular function	1.39856	0.0399431	up				GO:0003007	heart morphogenesis	Biological process	2.49417	0.003205	up
GO:0044212	transcription regulatory region DNA binding	Molecular function	1.38985	0.0407525	up				GO:0010941	regulation of cell death	Biological process	2.49228	0.00321898	up
GO:0001067	regulatory region nucleic acid binding	Molecular function	1.38782	0.0409435	up				GO:0000209	protein polyubiquitination	Biological process	2.49144	0.00322524	up
GO:0004559	alpha-mannosidase activity	Molecular function	1.36921	0.0427356	up				GO:0090066	regulation of anatomical structure size	Biological process	2.48818	0.00324954	up
GO:0005161	platelet-derived growth factor receptor binding	Molecular function	1.36921	0.0427356	up				GO:0007346	regulation of mitotic cell cycle	Biological process	2.48258	0.00329174	up
GO:0046965	retinoid X receptor binding	Molecular function	1.36921	0.0427356	up				GO:0000045	autophagosome assembly	Biological process	2.4782	0.00332509	up
GO:0016740	transferase activity	Molecular function	1.36135	0.0435165	up				GO:0061458	reproductive system development	Biological process	2.47166	0.00337552	up
GO:0008143	poly(A) binding	Molecular function	1.3418	0.0455201	up				GO:0044248	cellular catabolic process	Biological process	2.45624	0.00349749	up
GO:0008353	RNA polymerase II carboxy-terminal domain kinase activity	Molecular function	1.3418	0.0455201	up				GO:2000171	negative regulation of dendrite development	Biological process	2.45525	0.00350554	up
GO:0015923	mannosidase activity	Molecular function	1.3418	0.0455201	up				GO:0034654	nucleobase-containing compound biosynthetic process	Biological process	2.44981	0.00354972	up
GO:0140110	transcription regulator activity	Molecular function	1.32477	0.0473407	up				GO:0030154	cell differentiation	Biological process	2.4497	0.00355058	up
GO:0004383	guanylate cyclase activity	Molecular function	1.31608	0.0482966	up				GO:2000045	regulation of G1/S transition of mitotic cell cycle	Biological process	2.44589	0.00358186	up
GO:0046625	sphingolipid binding	Molecular function	1.31608	0.0482966	up				GO:0010556	regulation of macromolecule biosynthetic process	Biological process	2.43437	0.00367811	up
GO:1903828	negative regulation of cellular protein localization	Biological process	5.55604	2.77947e-06	down				GO:0071901	negative regulation of protein serine/threonine kinase activity	Biological process	2.43117	0.00370536	up
GO:0034698	response to gonadotropin	Biological process	3.97422	0.000106116	down				GO:1902806	regulation of cell cycle G1/S phase transition	Biological process	2.42905	0.00372349	up
GO:0048583	regulation of response to stimulus	Biological process	3.57286	0.000267387	down				GO:0051716	cellular response to stimulus	Biological process	2.4144	0.00385127	up
GO:0023051	regulation of signaling	Biological process	3.48545	0.000326998	down				GO:0016567	protein ubiquitination	Biological process	2.41322	0.00386173	up
GO:0010646	regulation of cell communication	Biological process	3.35275	0.000443867	down				GO:0000288	nuclear-transcribed mRNA catabolic process, deadenylation-dependent decay	Biological process	2.41256	0.0038676	up
GO:1990778	protein localization to cell periphery	Biological process	3.29775	0.000503795	down				GO:0065008	regulation of biological quality	Biological process	2.41195	0.00387301	up
GO:0006491	N-glycan processing	Biological process	3.19331	0.000640745	down				GO:2000060	positive regulation of ubiquitin-dependent protein catabolic process	Biological process	2.41107	0.00388087	up
GO:0002009	morphogenesis of an epithelium	Biological process	3.18229	0.000657212	down				GO:0006470	protein dephosphorylation	Biological process	2.40508	0.00393479	up
GO:0071560	cellular response to transforming growth factor beta stimulus	Biological process	3.07588	0.000839682	down				GO:0007155	cell adhesion	Biological process	2.38608	0.00411076	up
GO:1901565	organonitrogen compound catabolic process	Biological process	3.03154	0.000929942	down				GO:0051403	stress-activated MAPK cascade	Biological process	2.38474	0.00412342	up
GO:0071559	response to transforming growth factor beta	Biological process	3.02728	0.00093912	down				GO:1905037	autophagosome organization	Biological process	2.3783	0.00418503	up
GO:0072659	protein localization to plasma membrane	Biological process	3.01529	0.000965399	down				GO:0009790	embryo development	Biological process	2.37662	0.00420129	up
GO:0051128	regulation of cellular component organization	Biological process	2.96686	0.00107929	down				GO:0061640	cytoskeleton-dependent cytokinesis	Biological process	2.37628	0.00420456	up
GO:0002011	morphogenesis of an epithelial sheet	Biological process	2.92229	0.00119593	down				GO:0043170	macromolecule metabolic process	Biological process	2.36216	0.00434352	up
GO:0048729	tissue morphogenesis	Biological process	2.89804	0.00126461	down				GO:0019438	aromatic compound biosynthetic process	Biological process	2.35296	0.00443649	up
GO:0045859	regulation of protein kinase activity	Biological process	2.8458	0.00142626	down				GO:0022008	neurogenesis	Biological process	2.34783	0.00448926	up
GO:0022008	neurogenesis	Biological process	2.84499	0.00142892	down				GO:0001657	ureteric bud development	Biological process	2.34605	0.00450769	up
GO:2000027	regulation of organ morphogenesis	Biological process	2.84303	0.0014354	down				GO:0048640	negative regulation of developmental growth	Biological process	2.34605	0.00450769	up
GO:0051651	maintenance of location in cell	Biological process	2.84055	0.0014436	down				GO:0061003	positive regulation of dendritic spine morphogenesis	Biological process	2.34467	0.00452203	up
GO:0009966	regulation of signal transduction	Biological process	2.83268	0.00147002	down				GO:0016043	cellular component organization	Biological process	2.32616	0.00471892	up
GO:0043549	regulation of kinase activity	Biological process	2.76834	0.00170473	down				GO:0016358	dendrite development	Biological process	2.31732	0.00481598	up
GO:0016197	endosomal transport	Biological process	2.7569	0.00175025	down				GO:0072163	mesonephric epithelium development	Biological process	2.31429	0.00484962	up
GO:2000026	regulation of multicellular organismal development	Biological process	2.74917	0.00178169	down				GO:0072164	mesonephric tubule development	Biological process	2.31429	0.00484962	up
GO:0033674	positive regulation of kinase activity	Biological process	2.74651	0.00179262	down				GO:0006890	retrograde vesicle-mediated transport, Golgi to ER	Biological process	2.30567	0.0049469	up
GO:0051130	positive regulation of cellular component organization	Biological process	2.73708	0.00183196	down				GO:0048814	regulation of dendrite morphogenesis	Biological process	2.30567	0.0049469	up
GO:0010976	positive regulation of neuron projection development	Biological process	2.72501	0.00188361	down				GO:0035725	sodium ion transmembrane transport	Biological process	2.30356	0.00497093	up
GO:0045860	positive regulation of protein kinase activity	Biological process	2.7233	0.00189105	down				GO:0046777	protein autophosphorylation	Biological process	2.29907	0.00502265	up
GO:0051338	regulation of transferase activity	Biological process	2.67295	0.00212347	down				GO:0030155	regulation of cell adhesion	Biological process	2.28913	0.00513896	up
GO:0007165	signal transduction	Biological process	2.67043	0.00213585	down				GO:0010605	negative regulation of macromolecule metabolic process	Biological process	2.28045	0.00524267	up
GO:0034613	cellular protein localization	Biological process	2.66138	0.00218084	down				GO:1900006	positive regulation of dendrite development	Biological process	2.27937	0.00525571	up
GO:0043583	ear development	Biological process	2.66054	0.00218506	down				GO:0031324	negative regulation of cellular metabolic process	Biological process	2.27827	0.00526904	up
GO:0071248	cellular response to metal ion	Biological process	2.63346	0.00232561	down				GO:0032924	activin receptor signaling pathway	Biological process	2.26463	0.00543718	up
GO:0070727	cellular macromolecule localization	Biological process	2.62646	0.00236342	down				GO:0044265	cellular macromolecule catabolic process	Biological process	2.25882	0.00551042	up
GO:0030307	positive regulation of cell growth	Biological process	2.57856	0.00263899	down				GO:0001710	mesodermal cell fate commitment	Biological process	2.25542	0.00555366	up
GO:0051056	regulation of small GTPase mediated signal transduction	Biological process	2.5664	0.00271393	down				GO:0099054	presynapse assembly	Biological process	2.25542	0.00555366	up
GO:0050794	regulation of cellular process	Biological process	2.56446	0.00272609	down				GO:0061387	regulation of extent of cell growth	Biological process	2.25225	0.00559436	up
GO:0007417	central nervous system development	Biological process	2.55434	0.00279034	down				GO:0023014	signal transduction by protein phosphorylation	Biological process	2.25118	0.0056081	up
GO:0001881	receptor recycling	Biological process	2.54888	0.00282563	down				GO:0032328	alanine transport	Biological process	2.23959	0.00575979	up
GO:0023052	signaling	Biological process	2.52889	0.00295874	down				GO:0033089	positive regulation of T cell differentiation in thymus	Biological process	2.23959	0.00575979	up
GO:0003156	regulation of animal organ formation	Biological process	2.51149	0.00307969	down				GO:1904896	ESCRT complex disassembly	Biological process	2.23959	0.00575979	up
GO:0070862	negative regulation of protein exit from endoplasmic reticulum	Biological process	2.49927	0.00316758	down				GO:1904903	ESCRT III complex disassembly	Biological process	2.23959	0.00575979	up
GO:0098734	macromolecule depalmitoylation	Biological process	2.49927	0.00316758	down				GO:2001214	positive regulation of vasculogenesis	Biological process	2.23959	0.00575979	up
GO:0007154	cell communication	Biological process	2.49016	0.00323478	down				GO:1903827	regulation of cellular protein localization	Biological process	2.2327	0.00585199	up
GO:0007167	enzyme linked receptor protein signaling pathway	Biological process	2.48834	0.00324833	down				GO:0000902	cell morphogenesis	Biological process	2.23141	0.00586933	up
GO:0042325	regulation of phosphorylation	Biological process	2.48492	0.00327404	down				GO:0040017	positive regulation of locomotion	Biological process	2.22495	0.00595726	up
GO:0051716	cellular response to stimulus	Biological process	2.44895	0.00355676	down				GO:0048762	mesenchymal cell differentiation	Biological process	2.2185	0.00604647	up
GO:0010648	negative regulation of cell communication	Biological process	2.44063	0.00362555	down				GO:0046326	positive regulation of glucose import	Biological process	2.21359	0.00611523	up
GO:0035556	intracellular signal transduction	Biological process	2.44003	0.00363055	down				GO:0061951	establishment of protein localization to plasma membrane	Biological process	2.21359	0.00611523	up
GO:0051962	positive regulation of nervous system development	Biological process	2.43817	0.00364612	down				GO:1903727	positive regulation of phospholipid metabolic process	Biological process	2.21359	0.00611523	up
GO:0007399	nervous system development	Biological process	2.43078	0.00370866	down				GO:0090068	positive regulation of cell cycle process	Biological process	2.20975	0.00616948	up
GO:0023057	negative regulation of signaling	Biological process	2.42559	0.00375325	down				GO:0048813	dendrite morphogenesis	Biological process	2.2092	0.00617727	up
GO:0044093	positive regulation of molecular function	Biological process	2.42111	0.00379215	down				GO:0061448	connective tissue development	Biological process	2.20594	0.00622391	up
GO:0006983	ER overload response	Biological process	2.41458	0.00384967	down				GO:0045892	negative regulation of transcription, DNA-templated	Biological process	2.20302	0.00626589	up
GO:0045722	positive regulation of gluconeogenesis	Biological process	2.41458	0.00384967	down				GO:0001655	urogenital system development	Biological process	2.19313	0.00641016	up
GO:0071372	cellular response to follicle-stimulating hormone stimulus	Biological process	2.41458	0.00384967	down				GO:0001823	mesonephros development	Biological process	2.19209	0.00642555	up
GO:0032507	maintenance of protein location in cell	Biological process	2.39806	0.0039989	down				GO:1903828	negative regulation of cellular protein localization	Biological process	2.19209	0.00642555	up
GO:0098876	vesicle-mediated transport to the plasma membrane	Biological process	2.39806	0.0039989	down				GO:0002040	sprouting angiogenesis	Biological process	2.18956	0.00646308	up
GO:0030155	regulation of cell adhesion	Biological process	2.38563	0.00411497	down				GO:0032259	methylation	Biological process	2.18795	0.00648711	up
GO:0007223	Wnt signaling pathway, calcium modulating pathway	Biological process	2.37324	0.00423407	down				GO:0006814	sodium ion transport	Biological process	2.18121	0.00658859	up
GO:0050873	brown fat cell differentiation	Biological process	2.37324	0.00423407	down				GO:0007565	female pregnancy	Biological process	2.18091	0.00659313	up
GO:0090317	negative regulation of intracellular protein transport	Biological process	2.37324	0.00423407	down				GO:0006950	response to stress	Biological process	2.17634	0.00666281	up
GO:0016055	Wnt signaling pathway	Biological process	2.3665	0.00430033	down				GO:0051240	positive regulation of multicellular organismal process	Biological process	2.17577	0.00667161	up
GO:0007264	small GTPase mediated signal transduction	Biological process	2.36485	0.00431664	down				GO:0018130	heterocycle biosynthetic process	Biological process	2.17364	0.00670435	up
GO:0198738	cell-cell signaling by wnt	Biological process	2.35372	0.00442876	down				GO:1905564	positive regulation of vascular endothelial cell proliferation	Biological process	2.17191	0.00673121	up
GO:0009266	response to temperature stimulus	Biological process	2.34749	0.00449276	down				GO:0010717	regulation of epithelial to mesenchymal transition	Biological process	2.17177	0.00673336	up
GO:0071377	cellular response to glucagon stimulus	Biological process	2.3412	0.00455827	down				GO:0048013	ephrin receptor signaling pathway	Biological process	2.17177	0.00673336	up
GO:1900452	regulation of long term synaptic depression	Biological process	2.33785	0.00459359	down				GO:0060021	roof of mouth development	Biological process	2.17177	0.00673336	up
GO:0043255	regulation of carbohydrate biosynthetic process	Biological process	2.33716	0.00460089	down				GO:0010467	gene expression	Biological process	2.16452	0.00684674	up
GO:0071241	cellular response to inorganic substance	Biological process	2.32762	0.00470301	down				GO:0034198	cellular response to amino acid starvation	Biological process	2.16413	0.00685279	up
GO:0051960	regulation of nervous system development	Biological process	2.31834	0.00480468	down				GO:0030163	protein catabolic process	Biological process	2.16067	0.00690769	up
GO:1905330	regulation of morphogenesis of an epithelium	Biological process	2.31601	0.00483048	down				GO:0002066	columnar/cuboidal epithelial cell development	Biological process	2.14921	0.00709234	up
GO:0043085	positive regulation of catalytic activity	Biological process	2.31541	0.00483714	down				GO:1901362	organic cyclic compound biosynthetic process	Biological process	2.14379	0.0071815	up
GO:0045912	negative regulation of carbohydrate metabolic process	Biological process	2.31006	0.0048971	down				GO:0051649	establishment of localization in cell	Biological process	2.14217	0.00720828	up
GO:0051347	positive regulation of transferase activity	Biological process	2.30881	0.00491128	down				GO:0000079	regulation of cyclin-dependent protein serine/threonine kinase activity	Biological process	2.13973	0.00724883	up
GO:0007179	transforming growth factor beta receptor signaling pathway	Biological process	2.30448	0.00496049	down				GO:0007517	muscle organ development	Biological process	2.13625	0.00730719	up
GO:0048839	inner ear development	Biological process	2.30448	0.00496049	down				GO:0001837	epithelial to mesenchymal transition	Biological process	2.13432	0.00733974	up
GO:0001932	regulation of protein phosphorylation	Biological process	2.29034	0.00512456	down				GO:0008584	male gonad development	Biological process	2.13432	0.00733974	up
GO:0072595	maintenance of protein localization in organelle	Biological process	2.27978	0.00525074	down				GO:0010564	regulation of cell cycle process	Biological process	2.1267	0.00746971	up
GO:0035437	maintenance of protein localization in endoplasmic reticulum	Biological process	2.26775	0.00539824	down				GO:0065009	regulation of molecular function	Biological process	2.12592	0.007483	up
GO:0060601	lateral sprouting from an epithelium	Biological process	2.26775	0.00539824	down				GO:0000165	MAPK cascade	Biological process	2.12558	0.007489	up
GO:0019220	regulation of phosphate metabolic process	Biological process	2.26261	0.00546251	down				GO:0043112	receptor metabolic process	Biological process	2.12418	0.00751309	up
GO:0042147	retrograde transport, endosome to Golgi	Biological process	2.26007	0.00549449	down				GO:0048585	negative regulation of response to stimulus	Biological process	2.11599	0.00765608	up
GO:0071363	cellular response to growth factor stimulus	Biological process	2.25549	0.00555277	down				GO:0048193	Golgi vesicle transport	Biological process	2.11577	0.00766008	up
GO:0010975	regulation of neuron projection development	Biological process	2.24771	0.0056532	down				GO:0009056	catabolic process	Biological process	2.11434	0.00768536	up
GO:0009653	anatomical structure morphogenesis	Biological process	2.23573	0.0058113	down				GO:0046546	development of primary male sexual characteristics	Biological process	2.10996	0.00776324	up
GO:0048699	generation of neurons	Biological process	2.23393	0.00583536	down				GO:1903364	positive regulation of cellular protein catabolic process	Biological process	2.10996	0.00776324	up
GO:0120035	regulation of plasma membrane bounded cell projection organization	Biological process	2.22703	0.00592878	down				GO:0009612	response to mechanical stimulus	Biological process	2.10086	0.00792761	up
GO:0050793	regulation of developmental process	Biological process	2.22407	0.00596944	down				GO:0050896	response to stimulus	Biological process	2.09993	0.00794461	up
GO:0061951	establishment of protein localization to plasma membrane	Biological process	2.22162	0.00600317	down				GO:0051050	positive regulation of transport	Biological process	2.0999	0.00794514	up
GO:0051174	regulation of phosphorus metabolic process	Biological process	2.21586	0.00608338	down				GO:0048670	regulation of collateral sprouting	Biological process	2.09351	0.00806282	up
GO:0010810	regulation of cell-substrate adhesion	Biological process	2.20419	0.00624903	down				GO:0099172	presynapse organization	Biological process	2.09351	0.00806282	up
GO:0001921	positive regulation of receptor recycling	Biological process	2.20325	0.00626253	down				GO:0010863	positive regulation of phospholipase C activity	Biological process	2.07025	0.00850654	up
GO:0042159	lipoprotein catabolic process	Biological process	2.20325	0.00626253	down				GO:0032801	receptor catabolic process	Biological process	2.07025	0.00850654	up
GO:1901223	negative regulation of NIK/NF-kappaB signaling	Biological process	2.20325	0.00626253	down				GO:0097120	receptor localization to synapse	Biological process	2.07025	0.00850654	up
GO:0048523	negative regulation of cellular process	Biological process	2.20103	0.0062946	down				GO:0002067	glandular epithelial cell differentiation	Biological process	2.06968	0.0085177	up
GO:0006984	ER-nucleus signaling pathway	Biological process	2.19367	0.00640228	down				GO:0043161	proteasome-mediated ubiquitin-dependent protein catabolic process	Biological process	2.06937	0.0085237	up
GO:0031589	cell-substrate adhesion	Biological process	2.18901	0.00647125	down				GO:0042127	regulation of cell proliferation	Biological process	2.06838	0.00854309	up
GO:1903076	regulation of protein localization to plasma membrane	Biological process	2.18727	0.00649725	down				GO:2000027	regulation of organ morphogenesis	Biological process	2.0472	0.00897017	up
GO:0022407	regulation of cell-cell adhesion	Biological process	2.18619	0.00651341	down				GO:0045732	positive regulation of protein catabolic process	Biological process	2.04432	0.00902979	up
GO:0009968	negative regulation of signal transduction	Biological process	2.17673	0.00665684	down				GO:0030335	positive regulation of cell migration	Biological process	2.0432	0.00905315	up
GO:0001837	epithelial to mesenchymal transition	Biological process	2.17607	0.00666694	down				GO:0012501	programmed cell death	Biological process	2.04124	0.00909405	up
GO:0031344	regulation of cell projection organization	Biological process	2.17212	0.00672789	down				GO:1900542	regulation of purine nucleotide metabolic process	Biological process	2.03973	0.00912584	up
GO:0045936	negative regulation of phosphate metabolic process	Biological process	2.16131	0.00689749	down				GO:0045995	regulation of embryonic development	Biological process	2.03837	0.00915434	up
GO:0045785	positive regulation of cell adhesion	Biological process	2.15818	0.0069473	down				GO:1903322	positive regulation of protein modification by small protein conjugation or removal	Biological process	2.03837	0.00915434	up
GO:0010563	negative regulation of phosphorus metabolic process	Biological process	2.15592	0.00698356	down				GO:0032879	regulation of localization	Biological process	2.03489	0.0092281	up
GO:0001942	hair follicle development	Biological process	2.15235	0.00704126	down				GO:1902533	positive regulation of intracellular signal transduction	Biological process	2.0316	0.00929812	up
GO:0010715	regulation of extracellular matrix disassembly	Biological process	2.14355	0.00718539	down				GO:0010632	regulation of epithelial cell migration	Biological process	2.0291	0.00935182	up
GO:0050896	response to stimulus	Biological process	2.14339	0.007188	down				GO:0007033	vacuole organization	Biological process	2.02494	0.00944188	up
GO:0045927	positive regulation of growth	Biological process	2.133	0.00736209	down				GO:1905208	negative regulation of cardiocyte differentiation	Biological process	2.01972	0.0095561	up
GO:1905114	cell surface receptor signaling pathway involved in cell-cell signaling	Biological process	2.1292	0.00742669	down				GO:0045786	negative regulation of cell cycle	Biological process	2.01587	0.00964126	up
GO:0071236	cellular response to antibiotic	Biological process	2.12448	0.00750793	down				GO:0009887	animal organ morphogenesis	Biological process	2.01538	0.0096521	up
GO:0022404	molting cycle process	Biological process	2.11836	0.00761456	down				GO:0050775	positive regulation of dendrite morphogenesis	Biological process	2.015	0.00966051	up
GO:0022405	hair cycle process	Biological process	2.11836	0.00761456	down				GO:0090304	nucleic acid metabolic process	Biological process	2.00928	0.00978858	up
GO:0098773	skin epidermis development	Biological process	2.11836	0.00761456	down				GO:0060322	head development	Biological process	2.00887	0.00979786	up
GO:0070848	response to growth factor	Biological process	2.11771	0.00762583	down				GO:1903507	negative regulation of nucleic acid-templated transcription	Biological process	2.00795	0.0098187	up
GO:0042327	positive regulation of phosphorylation	Biological process	2.11618	0.00765276	down				GO:0048672	positive regulation of collateral sprouting	Biological process	2.00162	0.00996278	up
GO:0050789	regulation of biological process	Biological process	2.09807	0.00797863	down				GO:0060736	prostate gland growth	Biological process	2.00162	0.00996278	up
GO:0010718	positive regulation of epithelial to mesenchymal transition	Biological process	2.08859	0.00815478	down				GO:0061000	negative regulation of dendritic spine development	Biological process	2.00162	0.00996278	up
GO:0140058	neuron projection arborization	Biological process	2.088	0.00816576	down				GO:0070601	centromeric sister chromatid cohesion	Biological process	2.00162	0.00996278	up
GO:0065007	biological regulation	Biological process	2.08695	0.00818568	down				GO:2000052	positive regulation of non-canonical Wnt signaling pathway	Biological process	2.00162	0.00996278	up
GO:0010562	positive regulation of phosphorus metabolic process	Biological process	2.08518	0.00821902	down				GO:1902679	negative regulation of RNA biosynthetic process	Biological process	1.99341	0.0101529	up
GO:0045937	positive regulation of phosphate metabolic process	Biological process	2.08518	0.00821902	down				GO:0048645	animal organ formation	Biological process	1.99327	0.0101561	up
GO:0007166	cell surface receptor signaling pathway	Biological process	2.08101	0.00829828	down				GO:0010970	transport along microtubule	Biological process	1.99243	0.0101757	up
GO:0007605	sensory perception of sound	Biological process	2.07468	0.00842023	down				GO:0099111	microtubule-based transport	Biological process	1.99243	0.0101757	up
GO:0030163	protein catabolic process	Biological process	2.06771	0.00855645	down				GO:0042981	regulation of apoptotic process	Biological process	1.98973	0.0102393	up
GO:0016482	cytosolic transport	Biological process	2.06249	0.00865979	down				GO:0008406	gonad development	Biological process	1.98925	0.0102506	up
GO:0007178	transmembrane receptor protein serine/threonine kinase signaling pathway	Biological process	2.05931	0.00872342	down				GO:1904029	regulation of cyclin-dependent protein kinase activity	Biological process	1.98751	0.0102917	up
GO:0008104	protein localization	Biological process	2.05907	0.00872839	down				GO:0044092	negative regulation of molecular function	Biological process	1.9833	0.010392	up
GO:0043547	positive regulation of GTPase activity	Biological process	2.05675	0.00877497	down				GO:0060548	negative regulation of cell death	Biological process	1.98327	0.0103926	up
GO:0021549	cerebellum development	Biological process	2.05298	0.00885155	down				GO:0060491	regulation of cell projection assembly	Biological process	1.98197	0.0104238	up
GO:1904375	regulation of protein localization to cell periphery	Biological process	2.05298	0.00885155	down				GO:0048608	reproductive structure development	Biological process	1.98148	0.0104356	up
GO:0043087	regulation of GTPase activity	Biological process	2.04704	0.00897344	down				GO:0010828	positive regulation of glucose transmembrane transport	Biological process	1.98071	0.0104542	up
GO:0009987	cellular process	Biological process	2.04403	0.00903583	down				GO:0007613	memory	Biological process	1.96878	0.0107452	up
GO:0010823	negative regulation of mitochondrion organization	Biological process	2.03969	0.00912652	down				GO:0043407	negative regulation of MAP kinase activity	Biological process	1.96341	0.0108791	up
GO:0016331	morphogenesis of embryonic epithelium	Biological process	2.03844	0.00915298	down				GO:0048259	regulation of receptor-mediated endocytosis	Biological process	1.96341	0.0108791	up
GO:0010906	regulation of glucose metabolic process	Biological process	2.03715	0.00918006	down				GO:0001763	morphogenesis of a branching structure	Biological process	1.96311	0.0108866	up
GO:0032354	response to follicle-stimulating hormone	Biological process	2.03609	0.0092026	down				GO:0048333	mesodermal cell differentiation	Biological process	1.96187	0.0109176	up
GO:0033630	positive regulation of cell adhesion mediated by integrin	Biological process	2.03609	0.0092026	down				GO:1900274	regulation of phospholipase C activity	Biological process	1.96187	0.0109176	up
GO:0060572	morphogenesis of an epithelial bud	Biological process	2.03609	0.0092026	down				GO:0051962	positive regulation of nervous system development	Biological process	1.9617	0.0109219	up
GO:0033554	cellular response to stress	Biological process	2.03201	0.0092895	down				GO:0045596	negative regulation of cell differentiation	Biological process	1.9603	0.0109573	up
GO:0006950	response to stress	Biological process	2.01768	0.0096011	down				GO:0045785	positive regulation of cell adhesion	Biological process	1.95148	0.011182	up
GO:0033762	response to glucagon	Biological process	2.01607	0.00963668	down				GO:0032925	regulation of activin receptor signaling pathway	Biological process	1.95008	0.0112181	up
GO:0001890	placenta development	Biological process	2.01479	0.00966524	down				GO:1901575	organic substance catabolic process	Biological process	1.94948	0.0112336	up
GO:0045666	positive regulation of neuron differentiation	Biological process	2.00858	0.0098044	down				GO:0010498	proteasomal protein catabolic process	Biological process	1.94935	0.0112369	up
GO:0048010	vascular endothelial growth factor receptor signaling pathway	Biological process	2.00609	0.00986072	down				GO:0043085	positive regulation of catalytic activity	Biological process	1.94127	0.0114479	up
GO:0048522	positive regulation of cellular process	Biological process	1.997	0.0100692	down				GO:0044706	multi-multicellular organism process	Biological process	1.9356	0.0115986	up
GO:0010676	positive regulation of cellular carbohydrate metabolic process	Biological process	1.99297	0.0101632	down				GO:0060560	developmental growth involved in morphogenesis	Biological process	1.9356	0.0115986	up
GO:0051094	positive regulation of developmental process	Biological process	1.99082	0.0102135	down				GO:0032989	cellular component morphogenesis	Biological process	1.92666	0.0118397	up
GO:0009084	glutamine family amino acid biosynthetic process	Biological process	1.98738	0.0102949	down				GO:0007254	JNK cascade	Biological process	1.92585	0.0118617	up
GO:0036010	protein localization to endosome	Biological process	1.98738	0.0102949	down				GO:0009880	embryonic pattern specification	Biological process	1.92063	0.0120053	up
GO:0048268	clathrin coat assembly	Biological process	1.98738	0.0102949	down				GO:0060038	cardiac muscle cell proliferation	Biological process	1.92063	0.0120053	up
GO:0071371	cellular response to gonadotropin stimulus	Biological process	1.98738	0.0102949	down				GO:0016241	regulation of macroautophagy	Biological process	1.91924	0.0120437	up
GO:0051129	negative regulation of cellular component organization	Biological process	1.98081	0.0104518	down				GO:0035418	protein localization to synapse	Biological process	1.91073	0.012282	up
GO:0035567	non-canonical Wnt signaling pathway	Biological process	1.96866	0.0107483	down				GO:0097352	autophagosome maturation	Biological process	1.91073	0.012282	up
GO:0051058	negative regulation of small GTPase mediated signal transduction	Biological process	1.94825	0.0112655	down				GO:1901565	organonitrogen compound catabolic process	Biological process	1.90781	0.0123648	up
GO:0033043	regulation of organelle organization	Biological process	1.94492	0.0113523	down				GO:0006140	regulation of nucleotide metabolic process	Biological process	1.90748	0.0123742	up
GO:0006886	intracellular protein transport	Biological process	1.93914	0.0115043	down				GO:0043067	regulation of programmed cell death	Biological process	1.90743	0.0123758	up
GO:0031346	positive regulation of cell projection organization	Biological process	1.93862	0.011518	down				GO:0000187	activation of MAPK activity	Biological process	1.90331	0.0124937	up
GO:1902531	regulation of intracellular signal transduction	Biological process	1.93791	0.0115369	down				GO:0021819	layer formation in cerebral cortex	Biological process	1.90027	0.0125814	up
GO:0022037	metencephalon development	Biological process	1.91733	0.0120967	down				GO:0034497	protein localization to phagophore assembly site	Biological process	1.90027	0.0125814	up
GO:0007155	cell adhesion	Biological process	1.91459	0.0121735	down				GO:0060252	positive regulation of glial cell proliferation	Biological process	1.90027	0.0125814	up
GO:0048608	reproductive structure development	Biological process	1.91152	0.0122598	down				GO:2000095	regulation of Wnt signaling pathway, planar cell polarity pathway	Biological process	1.90027	0.0125814	up
GO:0050769	positive regulation of neurogenesis	Biological process	1.91152	0.0122598	down				GO:2001028	positive regulation of endothelial cell chemotaxis	Biological process	1.90027	0.0125814	up
GO:0048731	system development	Biological process	1.90967	0.012312	down				GO:0071310	cellular response to organic substance	Biological process	1.89941	0.0126064	up
GO:0051493	regulation of cytoskeleton organization	Biological process	1.90938	0.0123202	down				GO:0050807	regulation of synapse organization	Biological process	1.89877	0.0126249	up
GO:0048519	negative regulation of biological process	Biological process	1.90198	0.012532	down				GO:0030865	cortical cytoskeleton organization	Biological process	1.89675	0.0126837	up
GO:0046697	decidualization	Biological process	1.8982	0.0126416	down				GO:0051568	histone H3-K4 methylation	Biological process	1.89675	0.0126837	up
GO:0060716	labyrinthine layer blood vessel development	Biological process	1.8982	0.0126416	down				GO:0042552	myelination	Biological process	1.8916	0.0128352	up
GO:1990126	retrograde transport, endosome to plasma membrane	Biological process	1.8982	0.0126416	down				GO:0045787	positive regulation of cell cycle	Biological process	1.88564	0.0130124	up
GO:0061458	reproductive system development	Biological process	1.89343	0.0127812	down				GO:0061035	regulation of cartilage development	Biological process	1.88553	0.0130158	up
GO:0050954	sensory perception of mechanical stimulus	Biological process	1.89149	0.0128385	down				GO:0051239	regulation of multicellular organismal process	Biological process	1.8851	0.0130286	up
GO:0045185	maintenance of protein location	Biological process	1.88913	0.0129084	down				GO:0002068	glandular epithelial cell development	Biological process	1.88422	0.0130552	up
GO:0022610	biological adhesion	Biological process	1.88867	0.012922	down				GO:0002092	positive regulation of receptor internalization	Biological process	1.88422	0.0130552	up
GO:1903827	regulation of cellular protein localization	Biological process	1.88197	0.0131228	down				GO:0003309	type B pancreatic cell differentiation	Biological process	1.88422	0.0130552	up
GO:0080135	regulation of cellular response to stress	Biological process	1.87062	0.0134704	down				GO:0048103	somatic stem cell division	Biological process	1.88422	0.0130552	up
GO:1905475	regulation of protein localization to membrane	Biological process	1.87022	0.0134828	down				GO:2000311	regulation of AMPA receptor activity	Biological process	1.88422	0.0130552	up
GO:0075733	intracellular transport of virus	Biological process	1.86424	0.0136699	down				GO:0007165	signal transduction	Biological process	1.88355	0.0130753	up
GO:0032387	negative regulation of intracellular transport	Biological process	1.84427	0.014313	down				GO:0045137	development of primary sexual characteristics	Biological process	1.88332	0.0130823	up
GO:0060135	maternal process involved in female pregnancy	Biological process	1.84427	0.014313	down				GO:0051960	regulation of nervous system development	Biological process	1.88176	0.0131293	up
GO:0045664	regulation of neuron differentiation	Biological process	1.82904	0.0148239	down				GO:0051216	cartilage development	Biological process	1.88157	0.013135	up
GO:0030324	lung development	Biological process	1.82868	0.0148361	down				GO:0030705	cytoskeleton-dependent intracellular transport	Biological process	1.87853	0.0132274	up
GO:0007423	sensory organ development	Biological process	1.8284	0.0148457	down				GO:0002062	chondrocyte differentiation	Biological process	1.87457	0.0133484	up
GO:0010812	negative regulation of cell-substrate adhesion	Biological process	1.82469	0.0149731	down				GO:0045665	negative regulation of neuron differentiation	Biological process	1.87125	0.013451	up
GO:0060071	Wnt signaling pathway, planar cell polarity pathway	Biological process	1.82139	0.0150873	down				GO:0035239	tube morphogenesis	Biological process	1.87012	0.0134859	up
GO:0031175	neuron projection development	Biological process	1.82006	0.0151335	down				GO:0044271	cellular nitrogen compound biosynthetic process	Biological process	1.86575	0.0136224	up
GO:0007275	multicellular organism development	Biological process	1.81859	0.0151848	down				GO:0061138	morphogenesis of a branching epithelium	Biological process	1.86263	0.0137204	up
GO:0006607	NLS-bearing protein import into nucleus	Biological process	1.81821	0.0151981	down				GO:0038179	neurotrophin signaling pathway	Biological process	1.86147	0.0137573	up
GO:0097205	renal filtration	Biological process	1.81821	0.0151981	down				GO:0051154	negative regulation of striated muscle cell differentiation	Biological process	1.86147	0.0137573	up
GO:1903077	negative regulation of protein localization to plasma membrane	Biological process	1.81821	0.0151981	down				GO:0055026	negative regulation of cardiac muscle tissue development	Biological process	1.86147	0.0137573	up
GO:0031323	regulation of cellular metabolic process	Biological process	1.81719	0.0152339	down				GO:1900087	positive regulation of G1/S transition of mitotic cell cycle	Biological process	1.86147	0.0137573	up
GO:0070507	regulation of microtubule cytoskeleton organization	Biological process	1.80839	0.0155457	down				GO:2000147	positive regulation of cell motility	Biological process	1.86089	0.0137756	up
GO:0005976	polysaccharide metabolic process	Biological process	1.80829	0.0155492	down				GO:0048598	embryonic morphogenesis	Biological process	1.86012	0.0138001	up
GO:0046794	transport of virus	Biological process	1.80548	0.0156501	down				GO:0072001	renal system development	Biological process	1.85765	0.0138787	up
GO:0042303	molting cycle	Biological process	1.79534	0.01602	down				GO:0006914	autophagy	Biological process	1.85233	0.0140498	up
GO:0042633	hair cycle	Biological process	1.79534	0.01602	down				GO:0061919	process utilizing autophagic mechanism	Biological process	1.85233	0.0140498	up
GO:0090175	regulation of establishment of planar polarity	Biological process	1.79534	0.01602	down				GO:0046324	regulation of glucose import	Biological process	1.85121	0.0140859	up
GO:1902532	negative regulation of intracellular signal transduction	Biological process	1.79186	0.0161488	down				GO:0016571	histone methylation	Biological process	1.84739	0.0142105	up
GO:0030323	respiratory tube development	Biological process	1.78841	0.0162777	down				GO:0032880	regulation of protein localization	Biological process	1.84698	0.014224	up
GO:0048645	animal organ formation	Biological process	1.78664	0.0163442	down				GO:0031099	regeneration	Biological process	1.84388	0.0143258	up
GO:0001919	regulation of receptor recycling	Biological process	1.78114	0.0165525	down				GO:0007272	ensheathment of neurons	Biological process	1.84196	0.0143892	up
GO:0043457	regulation of cellular respiration	Biological process	1.78114	0.0165525	down				GO:0008366	axon ensheathment	Biological process	1.84196	0.0143892	up
GO:0090140	regulation of mitochondrial fission	Biological process	1.78114	0.0165525	down				GO:0032436	positive regulation of proteasomal ubiquitin-dependent protein catabolic process	Biological process	1.83989	0.0144581	up
GO:0030182	neuron differentiation	Biological process	1.78022	0.0165875	down				GO:0016055	Wnt signaling pathway	Biological process	1.83908	0.0144851	up
GO:0022603	regulation of anatomical structure morphogenesis	Biological process	1.77911	0.0166299	down				GO:0010721	negative regulation of cell development	Biological process	1.83662	0.0145675	up
GO:0033036	macromolecule localization	Biological process	1.7681	0.0170569	down				GO:0060351	cartilage development involved in endochondral bone morphogenesis	Biological process	1.82179	0.0150733	up
GO:0006109	regulation of carbohydrate metabolic process	Biological process	1.759	0.0174182	down				GO:2000463	positive regulation of excitatory postsynaptic potential	Biological process	1.82179	0.0150733	up
GO:0009408	response to heat	Biological process	1.759	0.0174182	down				GO:0031570	DNA integrity checkpoint	Biological process	1.81907	0.0151681	up
GO:0042698	ovulation cycle	Biological process	1.74998	0.0177835	down				GO:0198738	cell-cell signaling by wnt	Biological process	1.81748	0.0152238	up
GO:0051642	centrosome localization	Biological process	1.74578	0.0179564	down				GO:0032515	negative regulation of phosphoprotein phosphatase activity	Biological process	1.81738	0.0152271	up
GO:1904376	negative regulation of protein localization to cell periphery	Biological process	1.74578	0.0179564	down				GO:0000075	cell cycle checkpoint	Biological process	1.81569	0.0152867	up
GO:0080134	regulation of response to stress	Biological process	1.74189	0.018118	down				GO:0045022	early endosome to late endosome transport	Biological process	1.81397	0.0153474	up
GO:0048856	anatomical structure development	Biological process	1.74054	0.0181745	down				GO:0061614	pri-miRNA transcription by RNA polymerase II	Biological process	1.81397	0.0153474	up
GO:0051239	regulation of multicellular organismal process	Biological process	1.73854	0.0182582	down				GO:1901564	organonitrogen compound metabolic process	Biological process	1.81121	0.0154452	up
GO:0034110	regulation of homotypic cell-cell adhesion	Biological process	1.712	0.0194089	down				GO:0045934	negative regulation of nucleobase-containing compound metabolic process	Biological process	1.81076	0.0154611	up
GO:0036507	protein demannosylation	Biological process	1.712	0.0194089	down				GO:0006684	sphingomyelin metabolic process	Biological process	1.8081	0.015556	up
GO:0036508	protein alpha-1,2-demannosylation	Biological process	1.712	0.0194089	down				GO:0007501	mesodermal cell fate specification	Biological process	1.8081	0.015556	up
GO:0060037	pharyngeal system development	Biological process	1.712	0.0194089	down				GO:0048313	Golgi inheritance	Biological process	1.8081	0.015556	up
GO:0070861	regulation of protein exit from endoplasmic reticulum	Biological process	1.712	0.0194089	down				GO:2001212	regulation of vasculogenesis	Biological process	1.8081	0.015556	up
GO:0042493	response to drug	Biological process	1.70872	0.0195558	down				GO:0046907	intracellular transport	Biological process	1.80269	0.0157511	up
GO:0051240	positive regulation of multicellular organismal process	Biological process	1.70718	0.0196255	down				GO:0034762	regulation of transmembrane transport	Biological process	1.79593	0.0159982	up
GO:0031399	regulation of protein modification process	Biological process	1.69686	0.0200975	down				GO:0071840	cellular component organization or biogenesis	Biological process	1.79582	0.0160022	up
GO:0010675	regulation of cellular carbohydrate metabolic process	Biological process	1.69661	0.0201092	down				GO:0050808	synapse organization	Biological process	1.79421	0.0160617	up
GO:0007219	Notch signaling pathway	Biological process	1.69288	0.0202824	down				GO:1905477	positive regulation of protein localization to membrane	Biological process	1.79373	0.0160796	up
GO:0048666	neuron development	Biological process	1.68965	0.0204338	down				GO:0010631	epithelial cell migration	Biological process	1.77876	0.0166434	up
GO:0043467	regulation of generation of precursor metabolites and energy	Biological process	1.68484	0.0206614	down				GO:0006996	organelle organization	Biological process	1.77864	0.0166479	up
GO:0048585	negative regulation of response to stimulus	Biological process	1.68237	0.0207793	down				GO:0010923	negative regulation of phosphatase activity	Biological process	1.76875	0.0170314	up
GO:0045913	positive regulation of carbohydrate metabolic process	Biological process	1.68052	0.0208677	down				GO:0051899	membrane depolarization	Biological process	1.76875	0.0170314	up
GO:0060998	regulation of dendritic spine development	Biological process	1.68052	0.0208677	down				GO:0061014	positive regulation of mRNA catabolic process	Biological process	1.76813	0.0170556	up
GO:0030194	positive regulation of blood coagulation	Biological process	1.67967	0.0209091	down				GO:0033993	response to lipid	Biological process	1.76594	0.0171418	up
GO:0060571	morphogenesis of an epithelial fold	Biological process	1.67967	0.0209091	down				GO:0071495	cellular response to endogenous stimulus	Biological process	1.76471	0.0171907	up
GO:0061842	microtubule organizing center localization	Biological process	1.67967	0.0209091	down				GO:0031116	positive regulation of microtubule polymerization	Biological process	1.76252	0.0172776	up
GO:1900048	positive regulation of hemostasis	Biological process	1.67967	0.0209091	down				GO:0035883	enteroendocrine cell differentiation	Biological process	1.76252	0.0172776	up
GO:0001736	establishment of planar polarity	Biological process	1.6732	0.0212229	down				GO:0060914	heart formation	Biological process	1.76252	0.0172776	up
GO:0007164	establishment of tissue polarity	Biological process	1.6732	0.0212229	down				GO:0048729	tissue morphogenesis	Biological process	1.75941	0.0174016	up
GO:0042326	negative regulation of phosphorylation	Biological process	1.66934	0.0214122	down				GO:0010634	positive regulation of epithelial cell migration	Biological process	1.75702	0.0174977	up
GO:0001558	regulation of cell growth	Biological process	1.66225	0.0217645	down				GO:0006644	phospholipid metabolic process	Biological process	1.75525	0.017569	up
GO:0015031	protein transport	Biological process	1.65185	0.0222923	down				GO:0051093	negative regulation of developmental process	Biological process	1.75488	0.017584	up
GO:0010575	positive regulation of vascular endothelial growth factor production	Biological process	1.64867	0.022456	down				GO:0051253	negative regulation of RNA metabolic process	Biological process	1.75448	0.0176001	up
GO:0031069	hair follicle morphogenesis	Biological process	1.64867	0.022456	down				GO:0001708	cell fate specification	Biological process	1.75314	0.0176546	up
GO:0050820	positive regulation of coagulation	Biological process	1.64867	0.022456	down				GO:0061053	somite development	Biological process	1.75314	0.0176546	up
GO:0016049	cell growth	Biological process	1.64856	0.0224618	down				GO:0055021	regulation of cardiac muscle tissue growth	Biological process	1.75272	0.0176718	up
GO:0097061	dendritic spine organization	Biological process	1.64757	0.022513	down				GO:0071300	cellular response to retinoic acid	Biological process	1.75272	0.0176718	up
GO:0046677	response to antibiotic	Biological process	1.63942	0.022939	down				GO:0071496	cellular response to external stimulus	Biological process	1.75267	0.0176737	up
GO:0032355	response to estradiol	Biological process	1.63897	0.0229633	down				GO:1903052	positive regulation of proteolysis involved in cellular protein catabolic process	Biological process	1.74683	0.017913	up
GO:0071495	cellular response to endogenous stimulus	Biological process	1.63663	0.0230872	down				GO:0009719	response to endogenous stimulus	Biological process	1.74426	0.0180194	up
GO:0120039	plasma membrane bounded cell projection morphogenesis	Biological process	1.63533	0.0231565	down				GO:0021761	limbic system development	Biological process	1.74333	0.0180578	up
GO:0007162	negative regulation of cell adhesion	Biological process	1.63478	0.0231857	down				GO:0043409	negative regulation of MAPK cascade	Biological process	1.74268	0.018085	up
GO:0048858	cell projection morphogenesis	Biological process	1.62664	0.0236246	down				GO:0050673	epithelial cell proliferation	Biological process	1.74259	0.018089	up
GO:0001934	positive regulation of protein phosphorylation	Biological process	1.62421	0.0237567	down				GO:0060043	regulation of cardiac muscle cell proliferation	Biological process	1.74223	0.0181037	up
GO:0060341	regulation of cellular localization	Biological process	1.62218	0.0238682	down				GO:0090132	epithelium migration	Biological process	1.73891	0.0182429	up
GO:0022409	positive regulation of cell-cell adhesion	Biological process	1.6202	0.0239774	down				GO:2000145	regulation of cell motility	Biological process	1.73479	0.0184165	up
GO:0044257	cellular protein catabolic process	Biological process	1.61909	0.0240389	down				GO:0001501	skeletal system development	Biological process	1.73285	0.0184991	up
GO:0060292	long term synaptic depression	Biological process	1.61891	0.0240487	down				GO:0009892	negative regulation of metabolic process	Biological process	1.73223	0.0185255	up
GO:0019222	regulation of metabolic process	Biological process	1.61678	0.0241671	down				GO:0002042	cell migration involved in sprouting angiogenesis	Biological process	1.72527	0.0188247	up
GO:0010647	positive regulation of cell communication	Biological process	1.61157	0.0244583	down				GO:0034446	substrate adhesion-dependent cell spreading	Biological process	1.72527	0.0188247	up
GO:0050767	regulation of neurogenesis	Biological process	1.61103	0.0244889	down				GO:1903076	regulation of protein localization to plasma membrane	Biological process	1.72527	0.0188247	up
GO:0009064	glutamine family amino acid metabolic process	Biological process	1.60016	0.0251098	down				GO:0001709	cell fate determination	Biological process	1.72388	0.0188852	up
GO:0106027	neuron projection organization	Biological process	1.60016	0.0251098	down				GO:0017145	stem cell division	Biological process	1.72388	0.0188852	up
GO:0023056	positive regulation of signaling	Biological process	1.59621	0.025339	down				GO:0070317	negative regulation of G0 to G1 transition	Biological process	1.72388	0.0188852	up
GO:0019098	reproductive behavior	Biological process	1.5903	0.0256863	down				GO:0007050	cell cycle arrest	Biological process	1.72384	0.018887	up
GO:0060441	epithelial tube branching involved in lung morphogenesis	Biological process	1.5903	0.0256863	down				GO:0034616	response to laminar fluid shear stress	Biological process	1.72373	0.0188916	up
GO:2000272	negative regulation of signaling receptor activity	Biological process	1.5903	0.0256863	down				GO:0048172	regulation of short-term neuronal synaptic plasticity	Biological process	1.72373	0.0188916	up
GO:0010038	response to metal ion	Biological process	1.58933	0.0257436	down				GO:0048308	organelle inheritance	Biological process	1.72373	0.0188916	up
GO:0060541	respiratory system development	Biological process	1.58706	0.0258784	down				GO:0050774	negative regulation of dendrite morphogenesis	Biological process	1.72373	0.0188916	up
GO:0044766	multi-organism transport	Biological process	1.58486	0.0260097	down				GO:0051272	positive regulation of cellular component movement	Biological process	1.72283	0.0189308	up
GO:1902579	multi-organism localization	Biological process	1.58486	0.0260097	down				GO:0019226	transmission of nerve impulse	Biological process	1.72129	0.018998	up
GO:0044262	cellular carbohydrate metabolic process	Biological process	1.58443	0.0260355	down				GO:0040012	regulation of locomotion	Biological process	1.71754	0.0191626	up
GO:0072175	epithelial tube formation	Biological process	1.58416	0.0260521	down				GO:0070887	cellular response to chemical stimulus	Biological process	1.71685	0.0191932	up
GO:0060322	head development	Biological process	1.57526	0.0265911	down				GO:0008088	axo-dendritic transport	Biological process	1.70614	0.0196727	up
GO:0006468	protein phosphorylation	Biological process	1.57367	0.0266887	down				GO:0048668	collateral sprouting	Biological process	1.70613	0.0196728	up
GO:0009100	glycoprotein metabolic process	Biological process	1.57293	0.0267343	down				GO:0035295	tube development	Biological process	1.70041	0.0199339	up
GO:0009056	catabolic process	Biological process	1.5706	0.0268781	down				GO:0045981	positive regulation of nucleotide metabolic process	Biological process	1.6979	0.0200491	up
GO:0006486	protein glycosylation	Biological process	1.56344	0.0273253	down				GO:1900544	positive regulation of purine nucleotide metabolic process	Biological process	1.6979	0.0200491	up
GO:0043413	macromolecule glycosylation	Biological process	1.56344	0.0273253	down				GO:0098727	maintenance of cell number	Biological process	1.69785	0.0200518	up
GO:0007173	epidermal growth factor receptor signaling pathway	Biological process	1.56297	0.0273543	down				GO:0009267	cellular response to starvation	Biological process	1.69562	0.020155	up
GO:0034605	cellular response to heat	Biological process	1.56297	0.0273543	down				GO:0018210	peptidyl-threonine modification	Biological process	1.69562	0.020155	up
GO:0009065	glutamine family amino acid catabolic process	Biological process	1.56276	0.027368	down				GO:0030799	regulation of cyclic nucleotide metabolic process	Biological process	1.6937	0.0202444	up
GO:0048730	epidermis morphogenesis	Biological process	1.56276	0.027368	down				GO:0034968	histone lysine methylation	Biological process	1.6937	0.0202444	up
GO:1905476	negative regulation of protein localization to membrane	Biological process	1.56276	0.027368	down				GO:1901800	positive regulation of proteasomal protein catabolic process	Biological process	1.6937	0.0202444	up
GO:0015833	peptide transport	Biological process	1.56173	0.0274327	down				GO:1903363	negative regulation of cellular protein catabolic process	Biological process	1.69053	0.0203923	up
GO:0048518	positive regulation of biological process	Biological process	1.55944	0.027578	down				GO:0032269	negative regulation of cellular protein metabolic process	Biological process	1.69045	0.020396	up
GO:0005977	glycogen metabolic process	Biological process	1.555	0.0278611	down				GO:0090287	regulation of cellular response to growth factor stimulus	Biological process	1.68829	0.0204979	up
GO:0044248	cellular catabolic process	Biological process	1.55467	0.0278822	down				GO:0050803	regulation of synapse structure or activity	Biological process	1.68747	0.0205367	up
GO:0032886	regulation of microtubule-based process	Biological process	1.55373	0.0279429	down				GO:0001701	in utero embryonic development	Biological process	1.68534	0.0206376	up
GO:0051403	stress-activated MAPK cascade	Biological process	1.54962	0.0282083	down				GO:0043066	negative regulation of apoptotic process	Biological process	1.68129	0.0208312	up
GO:0032990	cell part morphogenesis	Biological process	1.54632	0.0284238	down				GO:0047496	vesicle transport along microtubule	Biological process	1.68112	0.0208393	up
GO:0006073	cellular glucan metabolic process	Biological process	1.54042	0.0288125	down				GO:0060999	positive regulation of dendritic spine development	Biological process	1.68112	0.0208393	up
GO:0044042	glucan metabolic process	Biological process	1.54042	0.0288125	down				GO:0098927	vesicle-mediated transport between endosomal compartments	Biological process	1.68112	0.0208393	up
GO:0051641	cellular localization	Biological process	1.53904	0.0289043	down				GO:0031647	regulation of protein stability	Biological process	1.67893	0.0209443	up
GO:0045597	positive regulation of cell differentiation	Biological process	1.53822	0.0289586	down				GO:0051179	localization	Biological process	1.67394	0.0211863	up
GO:0001893	maternal placenta development	Biological process	1.53621	0.0290929	down				GO:0071158	positive regulation of cell cycle arrest	Biological process	1.67103	0.0213292	up
GO:0003209	cardiac atrium morphogenesis	Biological process	1.53621	0.0290929	down				GO:0035308	negative regulation of protein dephosphorylation	Biological process	1.67097	0.0213317	up
GO:0007254	JNK cascade	Biological process	1.52932	0.029558	down				GO:0010508	positive regulation of autophagy	Biological process	1.66946	0.0214065	up
GO:0030111	regulation of Wnt signaling pathway	Biological process	1.52916	0.0295691	down				GO:0090130	tissue migration	Biological process	1.66154	0.0218002	up
GO:0007009	plasma membrane organization	Biological process	1.52606	0.0297809	down				GO:0061024	membrane organization	Biological process	1.66101	0.021827	up
GO:1901216	positive regulation of neuron death	Biological process	1.52606	0.0297809	down				GO:0061045	negative regulation of wound healing	Biological process	1.66042	0.0218563	up
GO:0071705	nitrogen compound transport	Biological process	1.52386	0.0299325	down				GO:0000077	DNA damage checkpoint	Biological process	1.65951	0.0219023	up
GO:0048598	embryonic morphogenesis	Biological process	1.51676	0.0304258	down				GO:0120032	regulation of plasma membrane bounded cell projection assembly	Biological process	1.65951	0.0219023	up
GO:0010720	positive regulation of cell development	Biological process	1.51523	0.0305328	down				GO:0009968	negative regulation of signal transduction	Biological process	1.6544	0.0221616	up
GO:0006511	ubiquitin-dependent protein catabolic process	Biological process	1.51241	0.0307317	down				GO:0002053	positive regulation of mesenchymal cell proliferation	Biological process	1.65242	0.0222627	up
GO:0042886	amide transport	Biological process	1.51237	0.0307346	down				GO:0071634	regulation of transforming growth factor beta production	Biological process	1.65242	0.0222627	up
GO:0001738	morphogenesis of a polarized epithelium	Biological process	1.51176	0.0307776	down				GO:0007379	segment specification	Biological process	1.64607	0.0225909	up
GO:0010574	regulation of vascular endothelial growth factor production	Biological process	1.5106	0.0308601	down				GO:0070828	heterochromatin organization	Biological process	1.64607	0.0225909	up
GO:0030947	regulation of vascular endothelial growth factor receptor signaling pathway	Biological process	1.5106	0.0308601	down				GO:0048468	cell development	Biological process	1.64331	0.0227346	up
GO:0060317	cardiac epithelial to mesenchymal transition	Biological process	1.5106	0.0308601	down				GO:0030307	positive regulation of cell growth	Biological process	1.64067	0.0228736	up
GO:0071354	cellular response to interleukin-6	Biological process	1.5106	0.0308601	down				GO:0046661	male sex differentiation	Biological process	1.64067	0.0228736	up
GO:0048762	mesenchymal cell differentiation	Biological process	1.50541	0.0312311	down				GO:0021795	cerebral cortex cell migration	Biological process	1.63977	0.0229207	up
GO:0061024	membrane organization	Biological process	1.50421	0.0313177	down				GO:0006986	response to unfolded protein	Biological process	1.63397	0.0232292	up
GO:0070085	glycosylation	Biological process	1.50242	0.0314468	down				GO:0090150	establishment of protein localization to membrane	Biological process	1.63156	0.0233582	up
GO:0010256	endomembrane system organization	Biological process	1.49907	0.0316905	down				GO:0043086	negative regulation of catalytic activity	Biological process	1.62912	0.0234899	up
GO:0007010	cytoskeleton organization	Biological process	1.49468	0.0320123	down				GO:0008610	lipid biosynthetic process	Biological process	1.6289	0.0235019	up
GO:0048568	embryonic organ development	Biological process	1.49394	0.0320671	down				GO:0016311	dephosphorylation	Biological process	1.62733	0.0235868	up
GO:0048511	rhythmic process	Biological process	1.48926	0.0324149	down				GO:0031668	cellular response to extracellular stimulus	Biological process	1.62617	0.0236502	up
GO:1901575	organic substance catabolic process	Biological process	1.48886	0.0324448	down				GO:0035305	negative regulation of dephosphorylation	Biological process	1.62209	0.0238731	up
GO:0010907	positive regulation of glucose metabolic process	Biological process	1.48587	0.0326687	down				GO:0044773	mitotic DNA damage checkpoint	Biological process	1.62209	0.0238731	up
GO:0032885	regulation of polysaccharide biosynthetic process	Biological process	1.48587	0.0326687	down				GO:0048017	inositol lipid-mediated signaling	Biological process	1.62203	0.0238762	up
GO:0043001	Golgi to plasma membrane protein transport	Biological process	1.48587	0.0326687	down				GO:0060070	canonical Wnt signaling pathway	Biological process	1.6203	0.0239718	up
GO:0060674	placenta blood vessel development	Biological process	1.48587	0.0326687	down				GO:0060840	artery development	Biological process	1.61869	0.0240607	up
GO:1900271	regulation of long-term synaptic potentiation	Biological process	1.48587	0.0326687	down				GO:0016192	vesicle-mediated transport	Biological process	1.61825	0.024085	up
GO:1903053	regulation of extracellular matrix organization	Biological process	1.48587	0.0326687	down				GO:0030334	regulation of cell migration	Biological process	1.61522	0.024254	up
GO:0019941	modification-dependent protein catabolic process	Biological process	1.46965	0.0339116	down				GO:0016202	regulation of striated muscle tissue development	Biological process	1.6147	0.0242831	up
GO:0060284	regulation of cell development	Biological process	1.46592	0.0342043	down				GO:0001704	formation of primary germ layer	Biological process	1.61375	0.0243358	up
GO:0050790	regulation of catalytic activity	Biological process	1.46366	0.0343827	down				GO:0035270	endocrine system development	Biological process	1.61375	0.0243358	up
GO:0006111	regulation of gluconeogenesis	Biological process	1.46195	0.034518	down				GO:0018108	peptidyl-tyrosine phosphorylation	Biological process	1.61213	0.0244272	up
GO:0010573	vascular endothelial growth factor production	Biological process	1.46195	0.034518	down				GO:0060485	mesenchyme development	Biological process	1.60646	0.024748	up
GO:0010737	protein kinase A signaling	Biological process	1.46195	0.034518	down				GO:0007420	brain development	Biological process	1.60361	0.0249111	up
GO:0019228	neuronal action potential	Biological process	1.46195	0.034518	down				GO:0010517	regulation of phospholipase activity	Biological process	1.60331	0.0249279	up
GO:0043243	positive regulation of protein complex disassembly	Biological process	1.46195	0.034518	down				GO:0072665	protein localization to vacuole	Biological process	1.60331	0.0249279	up
GO:0007160	cell-matrix adhesion	Biological process	1.45901	0.0347531	down				GO:1903672	positive regulation of sprouting angiogenesis	Biological process	1.60331	0.0249279	up
GO:0009612	response to mechanical stimulus	Biological process	1.45901	0.0347531	down				GO:0007017	microtubule-based process	Biological process	1.60297	0.0249479	up
GO:0001933	negative regulation of protein phosphorylation	Biological process	1.45856	0.0347892	down				GO:0001707	mesoderm formation	Biological process	1.60207	0.0249994	up
GO:0031400	negative regulation of protein modification process	Biological process	1.45706	0.0349091	down				GO:0043536	positive regulation of blood vessel endothelial cell migration	Biological process	1.60207	0.0249994	up
GO:0009719	response to endogenous stimulus	Biological process	1.45572	0.0350168	down				GO:1903725	regulation of phospholipid metabolic process	Biological process	1.60207	0.0249994	up
GO:0010035	response to inorganic substance	Biological process	1.45511	0.0350663	down				GO:0010390	histone monoubiquitination	Biological process	1.60118	0.0250509	up
GO:0006979	response to oxidative stress	Biological process	1.45357	0.0351905	down				GO:0019098	reproductive behavior	Biological process	1.60118	0.0250509	up
GO:0035148	tube formation	Biological process	1.44397	0.0359772	down				GO:0031112	positive regulation of microtubule polymerization or depolymerization	Biological process	1.60118	0.0250509	up
GO:0009893	positive regulation of metabolic process	Biological process	1.44147	0.0361849	down				GO:0051955	regulation of amino acid transport	Biological process	1.60118	0.0250509	up
GO:0003230	cardiac atrium development	Biological process	1.43881	0.0364072	down				GO:0071604	transforming growth factor beta production	Biological process	1.60118	0.0250509	up
GO:0006517	protein deglycosylation	Biological process	1.43881	0.0364072	down				GO:0071229	cellular response to acid chemical	Biological process	1.59976	0.025133	up
GO:2000826	regulation of heart morphogenesis	Biological process	1.43881	0.0364072	down				GO:0000904	cell morphogenesis involved in differentiation	Biological process	1.59524	0.0253954	up
GO:0006997	nucleus organization	Biological process	1.43464	0.0367589	down				GO:0050768	negative regulation of neurogenesis	Biological process	1.59231	0.0255675	up
GO:0030902	hindbrain development	Biological process	1.43464	0.0367589	down				GO:0051049	regulation of transport	Biological process	1.58615	0.025933	up
GO:0043632	modification-dependent macromolecule catabolic process	Biological process	1.4322	0.0369655	down				GO:0043069	negative regulation of programmed cell death	Biological process	1.58524	0.0259875	up
GO:0034599	cellular response to oxidative stress	Biological process	1.42543	0.0375464	down				GO:0002064	epithelial cell development	Biological process	1.58356	0.0260882	up
GO:0032502	developmental process	Biological process	1.42445	0.0376314	down				GO:0010638	positive regulation of organelle organization	Biological process	1.58256	0.0261483	up
GO:0045184	establishment of protein localization	Biological process	1.42181	0.0378605	down				GO:0018212	peptidyl-tyrosine modification	Biological process	1.5777	0.0264426	up
GO:0098609	cell-cell adhesion	Biological process	1.42175	0.0378661	down				GO:0072009	nephron epithelium development	Biological process	1.57617	0.0265358	up
GO:0034446	substrate adhesion-dependent cell spreading	Biological process	1.41863	0.0381395	down				GO:1901861	regulation of muscle tissue development	Biological process	1.57571	0.0265636	up
GO:0002931	response to ischemia	Biological process	1.4164	0.0383353	down				GO:0000920	cell separation after cytokinesis	Biological process	1.57423	0.0266545	up
GO:0045737	positive regulation of cyclin-dependent protein serine/threonine kinase activity	Biological process	1.4164	0.0383353	down				GO:0002076	osteoblast development	Biological process	1.57423	0.0266545	up
GO:0050919	negative chemotaxis	Biological process	1.4164	0.0383353	down				GO:0071636	positive regulation of transforming growth factor beta production	Biological process	1.57423	0.0266545	up
GO:0070741	response to interleukin-6	Biological process	1.4164	0.0383353	down				GO:0099068	postsynapse assembly	Biological process	1.57423	0.0266545	up
GO:0032872	regulation of stress-activated MAPK cascade	Biological process	1.40714	0.039162	down				GO:1900273	positive regulation of long-term synaptic potentiation	Biological process	1.57423	0.0266545	up
GO:0001843	neural tube closure	Biological process	1.40605	0.03926	down				GO:0003151	outflow tract morphogenesis	Biological process	1.57379	0.0266814	up
GO:0010717	regulation of epithelial to mesenchymal transition	Biological process	1.40605	0.03926	down				GO:0007032	endosome organization	Biological process	1.57379	0.0266814	up
GO:0007420	brain development	Biological process	1.40093	0.0397252	down				GO:0021766	hippocampus development	Biological process	1.57379	0.0266814	up
GO:0070302	regulation of stress-activated protein kinase signaling cascade	Biological process	1.39992	0.0398184	down				GO:0060420	regulation of heart growth	Biological process	1.57379	0.0266814	up
GO:0010677	negative regulation of cellular carbohydrate metabolic process	Biological process	1.39468	0.0403017	down				GO:0072384	organelle transport along microtubule	Biological process	1.57379	0.0266814	up
GO:0021587	cerebellum morphogenesis	Biological process	1.39468	0.0403017	down				GO:0035304	regulation of protein dephosphorylation	Biological process	1.57178	0.0268051	up
GO:0032881	regulation of polysaccharide metabolic process	Biological process	1.39468	0.0403017	down				GO:0097479	synaptic vesicle localization	Biological process	1.57178	0.0268051	up
GO:0061001	regulation of dendritic spine morphogenesis	Biological process	1.39468	0.0403017	down				GO:0034645	cellular macromolecule biosynthetic process	Biological process	1.57026	0.0268994	up
GO:0071542	dopaminergic neuron differentiation	Biological process	1.39468	0.0403017	down				GO:0060341	regulation of cellular localization	Biological process	1.56606	0.0271609	up
GO:0051963	regulation of synapse assembly	Biological process	1.39365	0.0403971	down				GO:0070316	regulation of G0 to G1 transition	Biological process	1.56106	0.0274754	up
GO:0060606	tube closure	Biological process	1.39365	0.0403971	down				GO:0051153	regulation of striated muscle cell differentiation	Biological process	1.55373	0.0279429	up
GO:0044087	regulation of cellular component biogenesis	Biological process	1.38823	0.0409046	down				GO:0010719	negative regulation of epithelial to mesenchymal transition	Biological process	1.55222	0.0280402	up
GO:0051402	neuron apoptotic process	Biological process	1.38561	0.0411514	down				GO:0036258	multivesicular body assembly	Biological process	1.55222	0.0280402	up
GO:0001892	embryonic placenta development	Biological process	1.38142	0.0415508	down				GO:0048384	retinoic acid receptor signaling pathway	Biological process	1.55222	0.0280402	up
GO:0032874	positive regulation of stress-activated MAPK cascade	Biological process	1.38034	0.0416547	down				GO:1900739	regulation of protein insertion into mitochondrial membrane involved in apoptotic signaling pathway	Biological process	1.55222	0.0280402	up
GO:0048584	positive regulation of response to stimulus	Biological process	1.37686	0.0419897	down				GO:1900740	positive regulation of protein insertion into mitochondrial membrane involved in apoptotic signaling pathway	Biological process	1.55222	0.0280402	up
GO:0060612	adipose tissue development	Biological process	1.3736	0.0423054	down				GO:0009888	tissue development	Biological process	1.55167	0.0280754	up
GO:0061614	pri-miRNA transcription by RNA polymerase II	Biological process	1.3736	0.0423054	down				GO:0031396	regulation of protein ubiquitination	Biological process	1.54843	0.028286	up
GO:1901998	toxin transport	Biological process	1.3736	0.0423054	down				GO:0032990	cell part morphogenesis	Biological process	1.54672	0.0283974	up
GO:0009725	response to hormone	Biological process	1.37183	0.042479	down				GO:0048332	mesoderm morphogenesis	Biological process	1.54609	0.0284389	up
GO:0070304	positive regulation of stress-activated protein kinase signaling cascade	Biological process	1.37156	0.042505	down				GO:0031623	receptor internalization	Biological process	1.54358	0.0286038	up
GO:0006112	energy reserve metabolic process	Biological process	1.36936	0.042721	down				GO:0001667	ameboidal-type cell migration	Biological process	1.54234	0.028685	up
GO:0060996	dendritic spine development	Biological process	1.36936	0.042721	down				GO:0120039	plasma membrane bounded cell projection morphogenesis	Biological process	1.53943	0.0288784	up
GO:0031098	stress-activated protein kinase signaling cascade	Biological process	1.3648	0.043172	down				GO:1903051	negative regulation of proteolysis involved in cellular protein catabolic process	Biological process	1.539	0.0289071	up
GO:0007169	transmembrane receptor protein tyrosine kinase signaling pathway	Biological process	1.36033	0.043618	down				GO:0048634	regulation of muscle organ development	Biological process	1.53768	0.0289948	up
GO:0090630	activation of GTPase activity	Biological process	1.35746	0.0439077	down				GO:0007163	establishment or maintenance of cell polarity	Biological process	1.53588	0.029115	up
GO:0038127	ERBB signaling pathway	Biological process	1.35424	0.0442347	down				GO:0007093	mitotic cell cycle checkpoint	Biological process	1.53196	0.0293792	up
GO:0046425	regulation of JAK-STAT cascade	Biological process	1.35424	0.0442347	down				GO:0007569	cell aging	Biological process	1.53163	0.0294016	up
GO:0000266	mitochondrial fission	Biological process	1.35315	0.0443458	down				GO:0048675	axon extension	Biological process	1.53163	0.0294016	up
GO:0060429	epithelium development	Biological process	1.35089	0.0445769	down				GO:0072089	stem cell proliferation	Biological process	1.53163	0.0294016	up
GO:0032970	regulation of actin filament-based process	Biological process	1.34807	0.0448668	down				GO:0030326	embryonic limb morphogenesis	Biological process	1.53094	0.0294483	up
GO:0048812	neuron projection morphogenesis	Biological process	1.34461	0.045226	down				GO:0035113	embryonic appendage morphogenesis	Biological process	1.53094	0.0294483	up
GO:0090092	regulation of transmembrane receptor protein serine/threonine kinase signaling pathway	Biological process	1.34379	0.0453117	down				GO:0009792	embryo development ending in birth or egg hatching	Biological process	1.52848	0.0296157	up
GO:0051051	negative regulation of transport	Biological process	1.3393	0.0457828	down				GO:0007417	central nervous system development	Biological process	1.52822	0.029633	up
GO:0031325	positive regulation of cellular metabolic process	Biological process	1.33876	0.0458397	down				GO:0046434	organophosphate catabolic process	Biological process	1.52818	0.0296359	up
GO:1904892	regulation of STAT cascade	Biological process	1.33721	0.0460036	down				GO:0042692	muscle cell differentiation	Biological process	1.5238	0.0299365	up
GO:0010613	positive regulation of cardiac muscle hypertrophy	Biological process	1.33328	0.046422	down				GO:0001822	kidney development	Biological process	1.52325	0.0299747	up
GO:0014742	positive regulation of muscle hypertrophy	Biological process	1.33328	0.046422	down				GO:0048858	cell projection morphogenesis	Biological process	1.52244	0.0300304	up
GO:0030866	cortical actin cytoskeleton organization	Biological process	1.33328	0.046422	down				GO:0032006	regulation of TOR signaling	Biological process	1.5194	0.0302413	up
GO:0033628	regulation of cell adhesion mediated by integrin	Biological process	1.33328	0.046422	down				GO:0055017	cardiac muscle tissue growth	Biological process	1.5194	0.0302413	up
GO:1904031	positive regulation of cyclin-dependent protein kinase activity	Biological process	1.33328	0.046422	down				GO:1904375	regulation of protein localization to cell periphery	Biological process	1.5194	0.0302413	up
GO:0048609	multicellular organismal reproductive process	Biological process	1.33187	0.0465722	down				GO:0014855	striated muscle cell proliferation	Biological process	1.51894	0.030273	up
GO:0000302	response to reactive oxygen species	Biological process	1.3302	0.0467525	down				GO:0031100	animal organ regeneration	Biological process	1.51894	0.030273	up
GO:0007265	Ras protein signal transduction	Biological process	1.32569	0.0472396	down				GO:0061097	regulation of protein tyrosine kinase activity	Biological process	1.51894	0.030273	up
GO:0071702	organic substance transport	Biological process	1.32516	0.047298	down				GO:0007369	gastrulation	Biological process	1.51543	0.0305187	up
GO:0014020	primary neural tube formation	Biological process	1.32271	0.0475656	down				GO:0046890	regulation of lipid biosynthetic process	Biological process	1.51454	0.0305813	up
GO:0030901	midbrain development	Biological process	1.32271	0.0475656	down				GO:0000122	negative regulation of transcription by RNA polymerase II	Biological process	1.51107	0.0308267	up
GO:0050808	synapse organization	Biological process	1.31844	0.0480353	down				GO:0014065	phosphatidylinositol 3-kinase signaling	Biological process	1.51093	0.0308369	up
GO:0021575	hindbrain morphogenesis	Biological process	1.31396	0.0485334	down				GO:0030968	endoplasmic reticulum unfolded protein response	Biological process	1.51093	0.0308369	up
GO:0060999	positive regulation of dendritic spine development	Biological process	1.31396	0.0485334	down				GO:0002065	columnar/cuboidal epithelial cell differentiation	Biological process	1.50986	0.0309128	up
GO:0050821	protein stabilization	Biological process	1.3122	0.0487302	down				GO:1902110	positive regulation of mitochondrial membrane permeability involved in apoptotic process	Biological process	1.50801	0.0310445	up
GO:0031329	regulation of cellular catabolic process	Biological process	1.3119	0.0487636	down				GO:0090330	regulation of platelet aggregation	Biological process	1.50751	0.031081	up
GO:0006892	post-Golgi vesicle-mediated transport	Biological process	1.31143	0.0488173	down				GO:0097062	dendritic spine maintenance	Biological process	1.50751	0.031081	up
GO:0043502	regulation of muscle adaptation	Biological process	1.31143	0.0488173	down				GO:2000726	negative regulation of cardiac muscle cell differentiation	Biological process	1.50751	0.031081	up
GO:0010638	positive regulation of organelle organization	Biological process	1.31032	0.0489415	down				GO:0035886	vascular smooth muscle cell differentiation	Biological process	1.50539	0.0312326	up
GO:0098805	whole membrane	Cellular component	4.37352	4.23138e-05	down				GO:0036257	multivesicular body organization	Biological process	1.50539	0.0312326	up
GO:0055037	recycling endosome	Cellular component	4.07028	8.50591e-05	down				GO:0034620	cellular response to unfolded protein	Biological process	1.50057	0.0315816	up
GO:0030425	dendrite	Cellular component	3.43568	0.00036671	down				GO:0010827	regulation of glucose transmembrane transport	Biological process	1.49235	0.0321851	up
GO:0097447	dendritic tree	Cellular component	3.42805	0.000373211	down				GO:0030814	regulation of cAMP metabolic process	Biological process	1.49235	0.0321851	up
GO:0031527	filopodium membrane	Cellular component	3.42493	0.000375898	down				GO:0072401	signal transduction involved in DNA integrity checkpoint	Biological process	1.49235	0.0321851	up
GO:0031982	vesicle	Cellular component	3.32495	0.000473201	down				GO:0072422	signal transduction involved in DNA damage checkpoint	Biological process	1.49235	0.0321851	up
GO:0005768	endosome	Cellular component	3.30717	0.000492976	down				GO:0044774	mitotic DNA integrity checkpoint	Biological process	1.48842	0.0324772	up
GO:0005622	intracellular	Cellular component	3.23186	0.000586323	down				GO:0071156	regulation of cell cycle arrest	Biological process	1.48842	0.0324772	up
GO:0044424	intracellular part	Cellular component	3.20199	0.000628068	down				GO:0045023	G0 to G1 transition	Biological process	1.48722	0.0325673	up
GO:0043005	neuron projection	Cellular component	3.15783	0.000695303	down				GO:0045744	negative regulation of G-protein coupled receptor protein signaling pathway	Biological process	1.48722	0.0325673	up
GO:0005737	cytoplasm	Cellular component	2.97391	0.00106193	down				GO:1902808	positive regulation of cell cycle G1/S phase transition	Biological process	1.48722	0.0325673	up
GO:0044464	cell part	Cellular component	2.85808	0.00138649	down				GO:0008654	phospholipid biosynthetic process	Biological process	1.48601	0.0326578	up
GO:0044444	cytoplasmic part	Cellular component	2.855	0.00139637	down				GO:0051248	negative regulation of protein metabolic process	Biological process	1.48054	0.0330718	up
GO:0031410	cytoplasmic vesicle	Cellular component	2.84197	0.00143891	down				GO:0043534	blood vessel endothelial cell migration	Biological process	1.48029	0.0330911	up
GO:0097708	intracellular vesicle	Cellular component	2.83241	0.00147093	down				GO:0051270	regulation of cellular component movement	Biological process	1.47463	0.0335251	up
GO:0030175	filopodium	Cellular component	2.82356	0.0015012	down				GO:0048812	neuron projection morphogenesis	Biological process	1.47281	0.0336659	up
GO:0043226	organelle	Cellular component	2.81023	0.00154798	down				GO:0008585	female gonad development	Biological process	1.47228	0.0337069	up
GO:0005623	cell	Cellular component	2.77512	0.00167832	down				GO:0001503	ossification	Biological process	1.46785	0.0340525	up
GO:0010008	endosome membrane	Cellular component	2.7741	0.00168229	down				GO:0010595	positive regulation of endothelial cell migration	Biological process	1.4673	0.0340956	up
GO:0098588	bounding membrane of organelle	Cellular component	2.71304	0.00193626	down				GO:0030004	cellular monovalent inorganic cation homeostasis	Biological process	1.4673	0.0340956	up
GO:0030054	cell junction	Cellular component	2.68363	0.00207188	down				GO:0046323	glucose import	Biological process	1.46628	0.0341762	up
GO:0036477	somatodendritic compartment	Cellular component	2.6399	0.00229138	down				GO:0072395	signal transduction involved in cell cycle checkpoint	Biological process	1.46628	0.0341762	up
GO:0005829	cytosol	Cellular component	2.53834	0.00289506	down				GO:0042060	wound healing	Biological process	1.46268	0.0344606	up
GO:1990909	Wnt signalosome	Cellular component	2.50976	0.003092	down				GO:0050878	regulation of body fluid levels	Biological process	1.46109	0.0345869	up
GO:0044463	cell projection part	Cellular component	2.50914	0.00309645	down				GO:0001844	protein insertion into mitochondrial membrane involved in apoptotic signaling pathway	Biological process	1.46055	0.0346299	up
GO:0120038	plasma membrane bounded cell projection part	Cellular component	2.50914	0.00309645	down				GO:0032365	intracellular lipid transport	Biological process	1.46055	0.0346299	up
GO:0044433	cytoplasmic vesicle part	Cellular component	2.48364	0.00328367	down				GO:0043403	skeletal muscle tissue regeneration	Biological process	1.46055	0.0346299	up
GO:0055038	recycling endosome membrane	Cellular component	2.48057	0.00330699	down				GO:1902893	regulation of pri-miRNA transcription by RNA polymerase II	Biological process	1.46055	0.0346299	up
GO:0044440	endosomal part	Cellular component	2.45603	0.00349918	down				GO:0032330	regulation of chondrocyte differentiation	Biological process	1.45199	0.0353193	up
GO:0042995	cell projection	Cellular component	2.37332	0.00423328	down				GO:0060976	coronary vasculature development	Biological process	1.45199	0.0353193	up
GO:0120025	plasma membrane bounded cell projection	Cellular component	2.316	0.00483058	down				GO:1901799	negative regulation of proteasomal protein catabolic process	Biological process	1.45199	0.0353193	up
GO:0098794	postsynapse	Cellular component	2.28235	0.00521977	down				GO:1902686	mitochondrial outer membrane permeabilization involved in programmed cell death	Biological process	1.44827	0.0356226	up
GO:0030130	clathrin coat of trans-Golgi network vesicle	Cellular component	2.27815	0.0052705	down				GO:0010648	negative regulation of cell communication	Biological process	1.44667	0.0357542	up
GO:0097458	neuron part	Cellular component	2.26903	0.00538237	down				GO:0070304	positive regulation of stress-activated protein kinase signaling cascade	Biological process	1.44656	0.0357634	up
GO:0097060	synaptic membrane	Cellular component	2.23472	0.00582473	down				GO:0071774	response to fibroblast growth factor	Biological process	1.44656	0.0357634	up
GO:0005886	plasma membrane	Cellular component	2.22551	0.00594959	down				GO:1990138	neuron projection extension	Biological process	1.44656	0.0357634	up
GO:0032588	trans-Golgi network membrane	Cellular component	2.22339	0.00597875	down				GO:0002029	desensitization of G-protein coupled receptor protein signaling pathway	Biological process	1.4453	0.0358673	up
GO:0071944	cell periphery	Cellular component	2.22206	0.00599711	down				GO:0003323	type B pancreatic cell development	Biological process	1.4453	0.0358673	up
GO:0098858	actin-based cell projection	Cellular component	2.165	0.00683914	down				GO:0007617	mating behavior	Biological process	1.4453	0.0358673	up
GO:0012510	trans-Golgi network transport vesicle membrane	Cellular component	2.15389	0.00701629	down				GO:0022401	negative adaptation of signaling pathway	Biological process	1.4453	0.0358673	up
GO:0044459	plasma membrane part	Cellular component	2.11995	0.0075867	down				GO:0032331	negative regulation of chondrocyte differentiation	Biological process	1.4453	0.0358673	up
GO:0046658	anchored component of plasma membrane	Cellular component	2.10306	0.00788748	down				GO:0042474	middle ear morphogenesis	Biological process	1.4453	0.0358673	up
GO:0071437	invadopodium	Cellular component	2.09832	0.00797412	down				GO:0010033	response to organic substance	Biological process	1.4449	0.0359002	up
GO:0090723	growth cone part	Cellular component	2.09832	0.00797412	down				GO:0007018	microtubule-based movement	Biological process	1.44216	0.0361279	up
GO:0030426	growth cone	Cellular component	1.98962	0.010242	down				GO:0003333	amino acid transmembrane transport	Biological process	1.44072	0.0362475	up
GO:0043227	membrane-bounded organelle	Cellular component	1.96385	0.0108681	down				GO:0009611	response to wounding	Biological process	1.43162	0.0370153	up
GO:0030427	site of polarized growth	Cellular component	1.93389	0.0116443	down				GO:0048588	developmental cell growth	Biological process	1.42984	0.0371671	up
GO:0014069	postsynaptic density	Cellular component	1.88054	0.0131661	down				GO:1900371	regulation of purine nucleotide biosynthetic process	Biological process	1.42899	0.0372399	up
GO:0016328	lateral plasma membrane	Cellular component	1.8784	0.0132312	down				GO:2000134	negative regulation of G1/S transition of mitotic cell cycle	Biological process	1.426	0.0374974	up
GO:0099572	postsynaptic specialization	Cellular component	1.86337	0.0136971	down				GO:1901342	regulation of vasculature development	Biological process	1.42515	0.0375708	up
GO:0032279	asymmetric synapse	Cellular component	1.83799	0.0145214	down				GO:0023057	negative regulation of signaling	Biological process	1.42441	0.0376352	up
GO:0005912	adherens junction	Cellular component	1.824	0.0149968	down				GO:1902531	regulation of intracellular signal transduction	Biological process	1.4226	0.0377922	up
GO:0098984	neuron to neuron synapse	Cellular component	1.81305	0.0153797	down				GO:0042698	ovulation cycle	Biological process	1.41947	0.0380657	up
GO:0031528	microvillus membrane	Cellular component	1.79125	0.0161715	down				GO:0046889	positive regulation of lipid biosynthetic process	Biological process	1.41947	0.0380657	up
GO:0030424	axon	Cellular component	1.7728	0.0168731	down				GO:0050891	multicellular organismal water homeostasis	Biological process	1.41947	0.0380657	up
GO:0098589	membrane region	Cellular component	1.74331	0.0180586	down				GO:0010463	mesenchymal cell proliferation	Biological process	1.41782	0.0382106	up
GO:0045211	postsynaptic membrane	Cellular component	1.74077	0.0181648	down				GO:0010718	positive regulation of epithelial to mesenchymal transition	Biological process	1.41782	0.0382106	up
GO:0070161	anchoring junction	Cellular component	1.73293	0.0184956	down				GO:0043525	positive regulation of neuron apoptotic process	Biological process	1.41782	0.0382106	up
GO:0005925	focal adhesion	Cellular component	1.71281	0.0193728	down				GO:0048260	positive regulation of receptor-mediated endocytosis	Biological process	1.41782	0.0382106	up
GO:0098590	plasma membrane region	Cellular component	1.70071	0.0199198	down				GO:0060711	labyrinthine layer development	Biological process	1.41782	0.0382106	up
GO:0005924	cell-substrate adherens junction	Cellular component	1.69528	0.0201707	down				GO:0043001	Golgi to plasma membrane protein transport	Biological process	1.41756	0.0382331	up
GO:0018995	host	Cellular component	1.67773	0.0210023	down				GO:0048846	axon extension involved in axon guidance	Biological process	1.41756	0.0382331	up
GO:0043657	host cell	Cellular component	1.67773	0.0210023	down				GO:0090050	positive regulation of cell migration involved in sprouting angiogenesis	Biological process	1.41756	0.0382331	up
GO:0030055	cell-substrate junction	Cellular component	1.66651	0.0215521	down				GO:1900271	regulation of long-term synaptic potentiation	Biological process	1.41756	0.0382331	up
GO:0030125	clathrin vesicle coat	Cellular component	1.65867	0.0219448	down				GO:1902284	neuron projection extension involved in neuron projection guidance	Biological process	1.41756	0.0382331	up
GO:0031090	organelle membrane	Cellular component	1.6333	0.0232651	down				GO:0030808	regulation of nucleotide biosynthetic process	Biological process	1.41163	0.0387585	up
GO:0044456	synapse part	Cellular component	1.61353	0.0243485	down				GO:0009059	macromolecule biosynthetic process	Biological process	1.40911	0.0389844	up
GO:0016020	membrane	Cellular component	1.61235	0.0244149	down				GO:0007548	sex differentiation	Biological process	1.40568	0.0392934	up
GO:0005774	vacuolar membrane	Cellular component	1.59421	0.025456	down				GO:0045766	positive regulation of angiogenesis	Biological process	1.40516	0.0393405	up
GO:0044215	other organism	Cellular component	1.58346	0.026094	down				GO:0048871	multicellular organismal homeostasis	Biological process	1.40394	0.0394509	up
GO:0044216	other organism cell	Cellular component	1.58346	0.026094	down				GO:0071559	response to transforming growth factor beta	Biological process	1.39994	0.0398163	up
GO:0044217	other organism part	Cellular component	1.58346	0.026094	down				GO:0019827	stem cell population maintenance	Biological process	1.39448	0.0403198	up
GO:0030659	cytoplasmic vesicle membrane	Cellular component	1.53216	0.0293658	down				GO:0033077	T cell differentiation in thymus	Biological process	1.39133	0.0406132	up
GO:0030140	trans-Golgi network transport vesicle	Cellular component	1.52046	0.0301675	down				GO:0035794	positive regulation of mitochondrial membrane permeability	Biological process	1.39133	0.0406132	up
GO:0070062	extracellular exosome	Cellular component	1.48925	0.0324153	down				GO:0032465	regulation of cytokinesis	Biological process	1.3911	0.0406346	up
GO:0005773	vacuole	Cellular component	1.48745	0.0325499	down				GO:0042147	retrograde transport, endosome to Golgi	Biological process	1.3911	0.0406346	up
GO:0016323	basolateral plasma membrane	Cellular component	1.47062	0.0338362	down				GO:0044093	positive regulation of molecular function	Biological process	1.39105	0.0406399	up
GO:0012506	vesicle membrane	Cellular component	1.45834	0.0348064	down				GO:0006488	dolichol-linked oligosaccharide biosynthetic process	Biological process	1.38712	0.041009	up
GO:0000932	P-body	Cellular component	1.45769	0.0348586	down				GO:0021697	cerebellar cortex formation	Biological process	1.38712	0.041009	up
GO:1903561	extracellular vesicle	Cellular component	1.45107	0.0353943	down				GO:0032288	myelin assembly	Biological process	1.38712	0.041009	up
GO:0043230	extracellular organelle	Cellular component	1.44729	0.0357035	down				GO:0060117	auditory receptor cell development	Biological process	1.38712	0.041009	up
GO:0009897	external side of plasma membrane	Cellular component	1.44068	0.0362507	down				GO:0097734	extracellular exosome biogenesis	Biological process	1.38712	0.041009	up
GO:0044425	membrane part	Cellular component	1.42811	0.0373154	down				GO:1901889	negative regulation of cell junction assembly	Biological process	1.38712	0.041009	up
GO:0080008	Cul4-RING E3 ubiquitin ligase complex	Cellular component	1.42615	0.0374847	down				GO:0018022	peptidyl-lysine methylation	Biological process	1.38591	0.0411239	up
GO:0030176	integral component of endoplasmic reticulum membrane	Cellular component	1.42343	0.0377195	down				GO:0010518	positive regulation of phospholipase activity	Biological process	1.38466	0.0412424	up
GO:0043229	intracellular organelle	Cellular component	1.42282	0.0377728	down				GO:0099518	vesicle cytoskeletal trafficking	Biological process	1.38466	0.0412424	up
GO:0031226	intrinsic component of plasma membrane	Cellular component	1.41148	0.0387721	down				GO:0070997	neuron death	Biological process	1.38346	0.0413562	up
GO:0031227	intrinsic component of endoplasmic reticulum membrane	Cellular component	1.38774	0.0409501	down				GO:0030282	bone mineralization	Biological process	1.38273	0.0414256	up
GO:0045121	membrane raft	Cellular component	1.35084	0.0445825	down				GO:0006865	amino acid transport	Biological process	1.37812	0.0418678	up
GO:0098857	membrane microdomain	Cellular component	1.34508	0.0451772	down				GO:0003156	regulation of animal organ formation	Biological process	1.37631	0.0420428	up
GO:0051087	chaperone binding	Molecular function	2.7795	0.00166149	down				GO:0006623	protein targeting to vacuole	Biological process	1.37631	0.0420428	up
GO:0008474	palmitoyl-(protein) hydrolase activity	Molecular function	2.4721	0.00337209	down				GO:0019228	neuronal action potential	Biological process	1.37631	0.0420428	up
GO:0098599	palmitoyl hydrolase activity	Molecular function	2.4721	0.00337209	down				GO:0030816	positive regulation of cAMP metabolic process	Biological process	1.37631	0.0420428	up
GO:0005096	GTPase activator activity	Molecular function	2.38659	0.00410589	down				GO:0031062	positive regulation of histone methylation	Biological process	1.37631	0.0420428	up
GO:0060589	nucleoside-triphosphatase regulator activity	Molecular function	2.31206	0.00487457	down				GO:0038084	vascular endothelial growth factor signaling pathway	Biological process	1.37631	0.0420428	up
GO:0031625	ubiquitin protein ligase binding	Molecular function	2.1884	0.0064804	down				GO:0042491	inner ear auditory receptor cell differentiation	Biological process	1.37631	0.0420428	up
GO:0008047	enzyme activator activity	Molecular function	2.16466	0.00684444	down				GO:0043243	positive regulation of protein complex disassembly	Biological process	1.37631	0.0420428	up
GO:0030695	GTPase regulator activity	Molecular function	2.1321	0.00737733	down				GO:0046621	negative regulation of organ growth	Biological process	1.37631	0.0420428	up
GO:0044389	ubiquitin-like protein ligase binding	Molecular function	2.07753	0.00836503	down				GO:0051443	positive regulation of ubiquitin-protein transferase activity	Biological process	1.37631	0.0420428	up
GO:0051018	protein kinase A binding	Molecular function	2.00206	0.00995259	down				GO:0097421	liver regeneration	Biological process	1.37631	0.0420428	up
GO:0046983	protein dimerization activity	Molecular function	1.99228	0.0101792	down				GO:1904018	positive regulation of vasculature development	Biological process	1.37236	0.0424272	up
GO:0019207	kinase regulator activity	Molecular function	1.83823	0.0145135	down				GO:0051241	negative regulation of multicellular organismal process	Biological process	1.36926	0.0427305	up
GO:0004622	lysophospholipase activity	Molecular function	1.83087	0.0147614	down				GO:0034333	adherens junction assembly	Biological process	1.36701	0.0429522	up
GO:0045499	chemorepellent activity	Molecular function	1.83087	0.0147614	down				GO:0045844	positive regulation of striated muscle tissue development	Biological process	1.36701	0.0429522	up
GO:0042813	Wnt-activated receptor activity	Molecular function	1.792	0.0161437	down				GO:0048636	positive regulation of muscle organ development	Biological process	1.36701	0.0429522	up
GO:0030159	receptor signaling complex scaffold activity	Molecular function	1.71972	0.0190668	down				GO:0018107	peptidyl-threonine phosphorylation	Biological process	1.3663	0.043023	up
GO:0030234	enzyme regulator activity	Molecular function	1.63836	0.0229952	down				GO:2001235	positive regulation of apoptotic signaling pathway	Biological process	1.36621	0.0430318	up
GO:0031072	heat shock protein binding	Molecular function	1.62836	0.0235312	down				GO:0046545	development of primary female sexual characteristics	Biological process	1.36127	0.0435241	up
GO:0043236	laminin binding	Molecular function	1.59316	0.0255173	down				GO:0060419	heart growth	Biological process	1.36127	0.0435241	up
GO:0017147	Wnt-protein binding	Molecular function	1.5107	0.0308529	down				GO:0051302	regulation of cell division	Biological process	1.36079	0.043572	up
GO:0042803	protein homodimerization activity	Molecular function	1.50852	0.0310087	down				GO:1905114	cell surface receptor signaling pathway involved in cell-cell signaling	Biological process	1.35798	0.0438555	up
GO:0019887	protein kinase regulator activity	Molecular function	1.47816	0.0332536	down				GO:0006508	proteolysis	Biological process	1.35591	0.0440644	up
GO:0016538	cyclin-dependent protein serine/threonine kinase regulator activity	Molecular function	1.46051	0.0346327	down				GO:0007568	aging	Biological process	1.35167	0.0444971	up
GO:0008536	Ran GTPase binding	Molecular function	1.43668	0.0365867	down				GO:0042594	response to starvation	Biological process	1.35062	0.0446046	up
GO:0008013	beta-catenin binding	Molecular function	1.43589	0.0366529	down				GO:0045184	establishment of protein localization	Biological process	1.34889	0.0447829	up
GO:0015293	symporter activity	Molecular function	1.42936	0.0372084	down				GO:1903825	organic acid transmembrane transport	Biological process	1.34698	0.0449801	up
GO:0016790	thiolester hydrolase activity	Molecular function	1.41361	0.0385822	down				GO:1905039	carboxylic acid transmembrane transport	Biological process	1.34698	0.0449801	up
GO:0008080	N-acetyltransferase activity	Molecular function	1.38409	0.0412958	down				GO:0050730	regulation of peptidyl-tyrosine phosphorylation	Biological process	1.34617	0.0450636	up
GO:0030165	PDZ domain binding	Molecular function	1.3716	0.0425008	down				GO:0048015	phosphatidylinositol-mediated signaling	Biological process	1.34425	0.0452639	up
GO:0030544	Hsp70 protein binding	Molecular function	1.32826	0.0469617	down				GO:0051961	negative regulation of nervous system development	Biological process	1.34393	0.0452973	up
GO:0008565	protein transporter activity	Molecular function	1.32335	0.0474953	down				GO:1901863	positive regulation of muscle tissue development	Biological process	1.34339	0.0453535	up
									GO:0007264	small GTPase mediated signal transduction	Biological process	1.34073	0.0456319	up
									GO:0000281	mitotic cytokinesis	Biological process	1.33701	0.0460248	up
									GO:0006305	DNA alkylation	Biological process	1.33701	0.0460248	up
									GO:0006306	DNA methylation	Biological process	1.33701	0.0460248	up
									GO:0043647	inositol phosphate metabolic process	Biological process	1.33701	0.0460248	up
									GO:0048663	neuron fate commitment	Biological process	1.33701	0.0460248	up
									GO:1902108	regulation of mitochondrial membrane permeability involved in apoptotic process	Biological process	1.33701	0.0460248	up
									GO:1905710	positive regulation of membrane permeability	Biological process	1.33701	0.0460248	up
									GO:0030501	positive regulation of bone mineralization	Biological process	1.33669	0.0460589	up
									GO:0051204	protein insertion into mitochondrial membrane	Biological process	1.33669	0.0460589	up
									GO:0006490	oligosaccharide-lipid intermediate biosynthetic process	Biological process	1.33255	0.0465	up
									GO:0006622	protein targeting to lysosome	Biological process	1.33255	0.0465	up
									GO:0021801	cerebral cortex radial glia guided migration	Biological process	1.33255	0.0465	up
									GO:0022030	telencephalon glial cell migration	Biological process	1.33255	0.0465	up
									GO:0023058	adaptation of signaling pathway	Biological process	1.33255	0.0465	up
									GO:0035162	embryonic hemopoiesis	Biological process	1.33255	0.0465	up
									GO:0044321	response to leptin	Biological process	1.33255	0.0465	up
									GO:0050857	positive regulation of antigen receptor-mediated signaling pathway	Biological process	1.33255	0.0465	up
									GO:0060065	uterus development	Biological process	1.33255	0.0465	up
									GO:0060713	labyrinthine layer morphogenesis	Biological process	1.33255	0.0465	up
									GO:2000113	negative regulation of cellular macromolecule biosynthetic process	Biological process	1.33228	0.0465291	up
									GO:0035966	response to topologically incorrect protein	Biological process	1.33109	0.0466563	up
									GO:0050821	protein stabilization	Biological process	1.3279	0.0470003	up
									GO:0070936	protein K48-linked ubiquitination	Biological process	1.3212	0.0477309	up
									GO:0051234	establishment of localization	Biological process	1.32042	0.0478167	up
									GO:0007215	glutamate receptor signaling pathway	Biological process	1.32022	0.0478393	up
									GO:0030516	regulation of axon extension	Biological process	1.32022	0.0478393	up
									GO:1903035	negative regulation of response to wounding	Biological process	1.32022	0.0478393	up
									GO:0051640	organelle localization	Biological process	1.32013	0.0478482	up
									GO:0035303	regulation of dephosphorylation	Biological process	1.31672	0.0482255	up
									GO:0016570	histone modification	Biological process	1.31477	0.048443	up
									GO:0045165	cell fate commitment	Biological process	1.3127	0.0486749	up
									GO:0030104	water homeostasis	Biological process	1.31078	0.0488905	up
									GO:0030810	positive regulation of nucleotide biosynthetic process	Biological process	1.31078	0.0488905	up
									GO:1900373	positive regulation of purine nucleotide biosynthetic process	Biological process	1.31078	0.0488905	up
									GO:1901214	regulation of neuron death	Biological process	1.30804	0.0491992	up
									GO:0043009	chordate embryonic development	Biological process	1.3076	0.049249	up
									GO:0007611	learning or memory	Biological process	1.30709	0.0493071	up
									GO:0005654	nucleoplasm	Cellular component	8.08621	8.19951e-09	up
									GO:0044424	intracellular part	Cellular component	7.82666	1.49054e-08	up
									GO:0005622	intracellular	Cellular component	7.30475	4.95732e-08	up
									GO:0044428	nuclear part	Cellular component	7.29	5.12866e-08	up
									GO:0031981	nuclear lumen	Cellular component	7.20161	6.28617e-08	up
									GO:0005737	cytoplasm	Cellular component	6.55435	2.79031e-07	up
									GO:0044446	intracellular organelle part	Cellular component	6.50127	3.15304e-07	up
									GO:0005829	cytosol	Cellular component	6.39664	4.01199e-07	up
									GO:0043229	intracellular organelle	Cellular component	6.18433	6.54144e-07	up
									GO:0044422	organelle part	Cellular component	5.96719	1.07847e-06	up
									GO:0043227	membrane-bounded organelle	Cellular component	5.92092	1.19973e-06	up
									GO:0005634	nucleus	Cellular component	5.57959	2.63273e-06	up
									GO:0043231	intracellular membrane-bounded organelle	Cellular component	5.3421	4.54879e-06	up
									GO:0043226	organelle	Cellular component	5.27748	5.27864e-06	up
									GO:1990234	transferase complex	Cellular component	4.9049	1.2448e-05	up
									GO:0044444	cytoplasmic part	Cellular component	4.79171	1.61544e-05	up
									GO:0044464	cell part	Cellular component	4.47896	3.31928e-05	up
									GO:0005623	cell	Cellular component	4.23902	5.76743e-05	up
									GO:0031974	membrane-enclosed lumen	Cellular component	4.14609	7.14345e-05	up
									GO:0043233	organelle lumen	Cellular component	4.14609	7.14345e-05	up
									GO:0070013	intracellular organelle lumen	Cellular component	4.14609	7.14345e-05	up
									GO:0098805	whole membrane	Cellular component	3.98393	0.000103771	up
									GO:0098588	bounding membrane of organelle	Cellular component	3.69693	0.000200943	up
									GO:0031902	late endosome membrane	Cellular component	3.46687	0.000341292	up
									GO:0030425	dendrite	Cellular component	3.45615	0.000349822	up
									GO:0097447	dendritic tree	Cellular component	3.44111	0.000362148	up
									GO:0032991	protein-containing complex	Cellular component	3.42869	0.000372655	up
									GO:0005770	late endosome	Cellular component	3.40717	0.000391587	up
									GO:1902911	protein kinase complex	Cellular component	3.39589	0.000401889	up
									GO:0043005	neuron projection	Cellular component	3.29302	0.000509305	up
									GO:0097458	neuron part	Cellular component	3.26675	0.000541062	up
									GO:0030496	midbody	Cellular component	3.1773	0.00066482	up
									GO:0005794	Golgi apparatus	Cellular component	3.1606	0.000690883	up
									GO:0031410	cytoplasmic vesicle	Cellular component	3.09896	0.000796236	up
									GO:0097708	intracellular vesicle	Cellular component	3.07812	0.000835366	up
									GO:0000151	ubiquitin ligase complex	Cellular component	3.01725	0.000961051	up
									GO:0005871	kinesin complex	Cellular component	3.0079	0.000981981	up
									GO:0036477	somatodendritic compartment	Cellular component	2.98059	0.00104572	up
									GO:0044451	nucleoplasm part	Cellular component	2.90347	0.0012489	up
									GO:0005773	vacuole	Cellular component	2.89944	0.00126054	up
									GO:0001518	voltage-gated sodium channel complex	Cellular component	2.80195	0.00157778	up
									GO:0055037	recycling endosome	Cellular component	2.75832	0.00174452	up
									GO:0012505	endomembrane system	Cellular component	2.735	0.00184076	up
									GO:0033268	node of Ranvier	Cellular component	2.68053	0.00208673	up
									GO:0061695	transferase complex, transferring phosphorus-containing groups	Cellular component	2.61852	0.00240699	up
									GO:0071944	cell periphery	Cellular component	2.60695	0.00247203	up
									GO:0042470	melanosome	Cellular component	2.6043	0.00248715	up
									GO:0048770	pigment granule	Cellular component	2.6043	0.00248715	up
									GO:0031090	organelle membrane	Cellular component	2.57841	0.00263991	up
									GO:0031519	PcG protein complex	Cellular component	2.55059	0.00281456	up
									GO:0090543	Flemming body	Cellular component	2.4853	0.00327117	up
									GO:0048471	perinuclear region of cytoplasm	Cellular component	2.43435	0.00367833	up
									GO:0035098	ESC/E(Z) complex	Cellular component	2.36967	0.00426903	up
									GO:0015630	microtubule cytoskeleton	Cellular component	2.3637	0.00432811	up
									GO:0120111	neuron projection cytoplasm	Cellular component	2.35979	0.00436732	up
									GO:0005875	microtubule associated complex	Cellular component	2.33607	0.00461239	up
									GO:0044431	Golgi apparatus part	Cellular component	2.33491	0.00462482	up
									GO:0010008	endosome membrane	Cellular component	2.31958	0.00479092	up
									GO:1902554	serine/threonine protein kinase complex	Cellular component	2.28209	0.00522283	up
									GO:0005768	endosome	Cellular component	2.25823	0.00551783	up
									GO:0045202	synapse	Cellular component	2.23993	0.00575539	up
									GO:0005886	plasma membrane	Cellular component	2.23213	0.00585969	up
									GO:0055038	recycling endosome membrane	Cellular component	2.20831	0.00619003	up
									GO:0098791	Golgi subcompartment	Cellular component	2.20071	0.00629924	up
									GO:0044433	cytoplasmic vesicle part	Cellular component	2.1641	0.00685335	up
									GO:0000421	autophagosome membrane	Cellular component	2.15671	0.00697084	up
									GO:0000323	lytic vacuole	Cellular component	2.15562	0.00698839	up
									GO:0005764	lysosome	Cellular component	2.15562	0.00698839	up
									GO:0005885	Arp2/3 protein complex	Cellular component	2.13337	0.00735585	up
									GO:0005667	transcription factor complex	Cellular component	2.12798	0.00744768	up
									GO:1902494	catalytic complex	Cellular component	2.06998	0.00851179	up
									GO:0000139	Golgi membrane	Cellular component	2.02776	0.00938071	up
									GO:0033270	paranode region of axon	Cellular component	2.02085	0.00953129	up
									GO:0043194	axon initial segment	Cellular component	2.02085	0.00953129	up
									GO:0032838	plasma membrane bounded cell projection cytoplasm	Cellular component	2.01573	0.00964429	up
									GO:0034706	sodium channel complex	Cellular component	1.97403	0.0106162	up
									GO:0012506	vesicle membrane	Cellular component	1.95057	0.0112055	up
									GO:0030659	cytoplasmic vesicle membrane	Cellular component	1.93366	0.0116503	up
									GO:0014704	intercalated disc	Cellular component	1.92867	0.0117849	up
									GO:0016604	nuclear body	Cellular component	1.90787	0.0123631	up
									GO:0044437	vacuolar part	Cellular component	1.88941	0.0129	up
									GO:0031984	organelle subcompartment	Cellular component	1.87997	0.0131836	up
									GO:0044463	cell projection part	Cellular component	1.87649	0.0132896	up
									GO:0120038	plasma membrane bounded cell projection part	Cellular component	1.87649	0.0132896	up
									GO:0031982	vesicle	Cellular component	1.86646	0.0136	up
									GO:0031461	cullin-RING ubiquitin ligase complex	Cellular component	1.86159	0.0137533	up
									GO:0043601	nuclear replisome	Cellular component	1.84532	0.0142783	up
									GO:0030897	HOPS complex	Cellular component	1.82693	0.014896	up
									GO:0044291	cell-cell contact zone	Cellular component	1.81961	0.0151493	up
									GO:0030424	axon	Cellular component	1.78998	0.016219	up
									GO:0044440	endosomal part	Cellular component	1.78389	0.0164479	up
									GO:0005925	focal adhesion	Cellular component	1.76265	0.0172723	up
									GO:0005774	vacuolar membrane	Cellular component	1.76015	0.0173721	up
									GO:0005662	DNA replication factor A complex	Cellular component	1.74236	0.0180983	up
									GO:0044459	plasma membrane part	Cellular component	1.7336	0.018467	up
									GO:0044456	synapse part	Cellular component	1.73316	0.0184858	up
									GO:0030894	replisome	Cellular component	1.72925	0.0186529	up
									GO:0032839	dendrite cytoplasm	Cellular component	1.72925	0.0186529	up
									GO:0005924	cell-substrate adherens junction	Cellular component	1.72712	0.0187447	up
									GO:1904115	axon cytoplasm	Cellular component	1.70815	0.0195817	up
									GO:0030055	cell-substrate junction	Cellular component	1.66926	0.0214158	up
									GO:0035097	histone methyltransferase complex	Cellular component	1.66462	0.0216459	up
									GO:0030014	CCR4-NOT complex	Cellular component	1.6645	0.021652	up
									GO:0035770	ribonucleoprotein granule	Cellular component	1.65169	0.0223001	up
									GO:0005776	autophagosome	Cellular component	1.60441	0.0248649	up
									GO:0005874	microtubule	Cellular component	1.59104	0.0256427	up
									GO:0016020	membrane	Cellular component	1.55043	0.0281558	up
									GO:0030054	cell junction	Cellular component	1.52856	0.0296101	up
									GO:0043228	non-membrane-bounded organelle	Cellular component	1.49085	0.0322958	up
									GO:0043232	intracellular non-membrane-bounded organelle	Cellular component	1.49085	0.0322958	up
									GO:0036464	cytoplasmic ribonucleoprotein granule	Cellular component	1.48324	0.0328668	up
									GO:0005815	microtubule organizing center	Cellular component	1.48139	0.033007	up
									GO:0005912	adherens junction	Cellular component	1.46899	0.0339632	up
									GO:0032279	asymmetric synapse	Cellular component	1.46499	0.0342778	up
									GO:0044309	neuron spine	Cellular component	1.43673	0.0365825	up
									GO:0098984	neuron to neuron synapse	Cellular component	1.42345	0.0377181	up
									GO:0009898	cytoplasmic side of plasma membrane	Cellular component	1.41037	0.0388711	up
									GO:0098562	cytoplasmic side of membrane	Cellular component	1.36233	0.0434179	up
									GO:0032391	photoreceptor connecting cilium	Cellular component	1.31989	0.0478756	up
									GO:0005802	trans-Golgi network	Cellular component	1.31944	0.0479253	up
									GO:0070161	anchoring junction	Cellular component	1.31278	0.0486649	up
									GO:0045211	postsynaptic membrane	Cellular component	1.30522	0.0495204	up
									GO:0005515	protein binding	Molecular function	13.5157	3.05035e-14	up
									GO:0005488	binding	Molecular function	9.47832	3.32414e-10	up
									GO:0140096	catalytic activity, acting on a protein	Molecular function	5.73399	1.84505e-06	up
									GO:0004672	protein kinase activity	Molecular function	5.28128	5.23264e-06	up
									GO:0004674	protein serine/threonine kinase activity	Molecular function	5.24276	5.71796e-06	up
									GO:0016740	transferase activity	Molecular function	5.0888	8.15085e-06	up
									GO:0043167	ion binding	Molecular function	4.81038	1.54746e-05	up
									GO:0016773	phosphotransferase activity, alcohol group as acceptor	Molecular function	4.57274	2.67462e-05	up
									GO:0016301	kinase activity	Molecular function	4.08335	8.25377e-05	up
									GO:0043168	anion binding	Molecular function	3.92115	0.000119908	up
									GO:0046332	SMAD binding	Molecular function	3.80362	0.000157175	up
									GO:0019900	kinase binding	Molecular function	3.73868	0.000182524	up
									GO:0061630	ubiquitin protein ligase activity	Molecular function	3.59552	0.000253794	up
									GO:0016772	transferase activity, transferring phosphorus-containing groups	Molecular function	3.54648	0.000284133	up
									GO:0032555	purine ribonucleotide binding	Molecular function	3.54043	0.000288118	up
									GO:0019901	protein kinase binding	Molecular function	3.49164	0.000322376	up
									GO:0031624	ubiquitin conjugating enzyme binding	Molecular function	3.489	0.000324338	up
									GO:0061659	ubiquitin-like protein ligase activity	Molecular function	3.46536	0.000342487	up
									GO:0017076	purine nucleotide binding	Molecular function	3.42291	0.000377647	up
									GO:0032553	ribonucleotide binding	Molecular function	3.41463	0.000384923	up
									GO:0035639	purine ribonucleoside triphosphate binding	Molecular function	3.36352	0.000432996	up
									GO:0097367	carbohydrate derivative binding	Molecular function	3.27413	0.000531955	up
									GO:0005109	frizzled binding	Molecular function	3.25214	0.000559583	up
									GO:0019904	protein domain specific binding	Molecular function	3.23659	0.000579973	up
									GO:0044390	ubiquitin-like protein conjugating enzyme binding	Molecular function	3.03919	0.00091371	up
									GO:0004842	ubiquitin-protein transferase activity	Molecular function	2.99856	0.00100331	up
									GO:0019787	ubiquitin-like protein transferase activity	Molecular function	2.88658	0.00129845	up
									GO:0005095	GTPase inhibitor activity	Molecular function	2.74116	0.00181485	up
									GO:0000166	nucleotide binding	Molecular function	2.64808	0.00224864	up
									GO:1901265	nucleoside phosphate binding	Molecular function	2.64136	0.00228371	up
									GO:0019899	enzyme binding	Molecular function	2.53874	0.00289242	up
									GO:0008276	protein methyltransferase activity	Molecular function	2.47987	0.0033123	up
									GO:0032559	adenyl ribonucleotide binding	Molecular function	2.45668	0.00349394	up
									GO:0000989	transcription factor activity, transcription factor binding	Molecular function	2.43992	0.00363146	up
									GO:0043394	proteoglycan binding	Molecular function	2.43968	0.00363349	up
									GO:0046875	ephrin receptor binding	Molecular function	2.41466	0.00384893	up
									GO:0042800	histone methyltransferase activity (H3-K4 specific)	Molecular function	2.40633	0.00392343	up
									GO:0003924	GTPase activity	Molecular function	2.39693	0.00400929	up
									GO:0000988	transcription factor activity, protein binding	Molecular function	2.38268	0.00414307	up
									GO:0030554	adenyl nucleotide binding	Molecular function	2.36755	0.00428992	up
									GO:0035591	signaling adaptor activity	Molecular function	2.27954	0.00525366	up
									GO:0005524	ATP binding	Molecular function	2.23619	0.00580513	up
									GO:1901981	phosphatidylinositol phosphate binding	Molecular function	2.226	0.00594286	up
									GO:0008157	protein phosphatase 1 binding	Molecular function	2.22197	0.00599832	up
									GO:1902936	phosphatidylinositol bisphosphate binding	Molecular function	2.21799	0.00605357	up
									GO:0008574	ATP-dependent microtubule motor activity, plus-end-directed	Molecular function	2.14831	0.00710709	up
									GO:0019902	phosphatase binding	Molecular function	2.13178	0.00738272	up
									GO:0005525	GTP binding	Molecular function	2.1237	0.00752142	up
									GO:0032561	guanyl ribonucleotide binding	Molecular function	2.11514	0.00767111	up
									GO:0005057	signal transducer activity, downstream of receptor	Molecular function	2.10987	0.00776475	up
									GO:0019001	guanyl nucleotide binding	Molecular function	2.10143	0.00791709	up
									GO:0019903	protein phosphatase binding	Molecular function	2.10041	0.00793585	up
									GO:0070411	I-SMAD binding	Molecular function	2.08774	0.00817068	up
									GO:0032550	purine ribonucleoside binding	Molecular function	2.08153	0.00828829	up
									GO:0019003	GDP binding	Molecular function	2.05922	0.00872527	up
									GO:0005509	calcium ion binding	Molecular function	2.05915	0.00872672	up
									GO:0001883	purine nucleoside binding	Molecular function	2.0401	0.00911809	up
									GO:0032549	ribonucleoside binding	Molecular function	2.02644	0.0094093	up
									GO:0042054	histone methyltransferase activity	Molecular function	2.0201	0.00954768	up
									GO:0060090	molecular adaptor activity	Molecular function	2.01731	0.00960928	up
									GO:0018024	histone-lysine N-methyltransferase activity	Molecular function	1.98062	0.0104563	up
									GO:0048185	activin binding	Molecular function	1.9757	0.0105754	up
									GO:0051219	phosphoprotein binding	Molecular function	1.97518	0.0105881	up
									GO:0036094	small molecule binding	Molecular function	1.9459	0.0113265	up
									GO:0003712	transcription cofactor activity	Molecular function	1.93775	0.0115411	up
									GO:0001882	nucleoside binding	Molecular function	1.93305	0.0116667	up
									GO:0005248	voltage-gated sodium channel activity	Molecular function	1.9178	0.0120836	up
									GO:0015459	potassium channel regulator activity	Molecular function	1.89483	0.0127401	up
									GO:0099106	ion channel regulator activity	Molecular function	1.87315	0.013392	up
									GO:0019887	protein kinase regulator activity	Molecular function	1.84703	0.0142225	up
									GO:0044212	transcription regulatory region DNA binding	Molecular function	1.79477	0.0160408	up
									GO:0008013	beta-catenin binding	Molecular function	1.78814	0.0162876	up
									GO:0001067	regulatory region nucleic acid binding	Molecular function	1.78667	0.0163428	up
									GO:0019207	kinase regulator activity	Molecular function	1.78529	0.016395	up
									GO:0000900	translation repressor activity, mRNA regulatory element binding	Molecular function	1.78274	0.0164916	up
									GO:0043024	ribosomal small subunit binding	Molecular function	1.78274	0.0164916	up
									GO:0001228	transcriptional activator activity, RNA polymerase II transcription regulatory region sequence-specific DNA binding	Molecular function	1.78254	0.0164993	up
									GO:0008144	drug binding	Molecular function	1.74981	0.0177906	up
									GO:0016247	channel regulator activity	Molecular function	1.73953	0.0182166	up
									GO:0016741	transferase activity, transferring one-carbon groups	Molecular function	1.70346	0.0197941	up
									GO:0005161	platelet-derived growth factor receptor binding	Molecular function	1.69864	0.0200152	up
									GO:0046965	retinoid X receptor binding	Molecular function	1.69864	0.0200152	up
									GO:0061631	ubiquitin conjugating enzyme activity	Molecular function	1.67501	0.0211343	up
									GO:0032947	protein-containing complex scaffold activity	Molecular function	1.67477	0.0211461	up
									GO:0061650	ubiquitin-like protein conjugating enzyme activity	Molecular function	1.62159	0.0239009	up
									GO:0008757	S-adenosylmethionine-dependent methyltransferase activity	Molecular function	1.61389	0.0243283	up
									GO:0008134	transcription factor binding	Molecular function	1.61203	0.0244326	up
									GO:0004702	signal transducer, downstream of receptor, with serine/threonine kinase activity	Molecular function	1.59951	0.0251471	up
									GO:0008168	methyltransferase activity	Molecular function	1.59329	0.0255102	up
									GO:0035091	phosphatidylinositol binding	Molecular function	1.55014	0.0281748	up
									GO:0003713	transcription coactivator activity	Molecular function	1.5336	0.0292682	up
									GO:0045309	protein phosphorylated amino acid binding	Molecular function	1.52556	0.0298152	up
									GO:0001134	transcription factor activity, transcription factor recruiting	Molecular function	1.52195	0.0300639	up
									GO:0003824	catalytic activity	Molecular function	1.5181	0.0303323	up
									GO:0016462	pyrophosphatase activity	Molecular function	1.51289	0.0306983	up
									GO:0001077	transcriptional activator activity, RNA polymerase II proximal promoter sequence-specific DNA binding	Molecular function	1.51027	0.0308836	up
									GO:0000976	transcription regulatory region sequence-specific DNA binding	Molecular function	1.5052	0.0312462	up
									GO:0016817	hydrolase activity, acting on acid anhydrides	Molecular function	1.4985	0.031732	up
									GO:0016818	hydrolase activity, acting on acid anhydrides, in phosphorus-containing anhydrides	Molecular function	1.4985	0.031732	up
									GO:0050699	WW domain binding	Molecular function	1.47541	0.033465	up
									GO:0004860	protein kinase inhibitor activity	Molecular function	1.4479	0.0356534	up
									GO:0016279	protein-lysine N-methyltransferase activity	Molecular function	1.43839	0.0364426	up
									GO:0000977	RNA polymerase II regulatory region sequence-specific DNA binding	Molecular function	1.43569	0.03667	up
									GO:0001012	RNA polymerase II regulatory region DNA binding	Molecular function	1.4115	0.0387704	up
									GO:0016278	lysine N-methyltransferase activity	Molecular function	1.40918	0.0389782	up
									GO:0000981	RNA polymerase II transcription factor activity, sequence-specific DNA binding	Molecular function	1.40799	0.0390845	up
									GO:1990837	sequence-specific double-stranded DNA binding	Molecular function	1.39715	0.0400731	up
									GO:0016538	cyclin-dependent protein serine/threonine kinase regulator activity	Molecular function	1.38814	0.0409127	up
									GO:0043539	protein serine/threonine kinase activator activity	Molecular function	1.38814	0.0409127	up
									GO:0017111	nucleoside-triphosphatase activity	Molecular function	1.36965	0.0426924	up
									GO:0043395	heparan sulfate proteoglycan binding	Molecular function	1.36338	0.0433127	up
									GO:0019210	kinase inhibitor activity	Molecular function	1.35803	0.0438504	up
									GO:0000978	RNA polymerase II proximal promoter sequence-specific DNA binding	Molecular function	1.3562	0.0440354	up
									GO:0140110	transcription regulator activity	Molecular function	1.35239	0.0444236	up
									GO:1990939	ATP-dependent microtubule motor activity	Molecular function	1.35061	0.0446054	up
									GO:0042056	chemoattractant activity	Molecular function	1.34717	0.0449604	up
									GO:0004725	protein tyrosine phosphatase activity	Molecular function	1.33651	0.0460781	up
									GO:0003725	double-stranded RNA binding	Molecular function	1.32564	0.0472455	up
									GO:0003705	transcription factor activity, RNA polymerase II distal enhancer sequence-specific binding	Molecular function	1.31535	0.0483787	up
									GO:0001965	G-protein alpha-subunit binding	Molecular function	1.30908	0.0490821	up
									GO:0030155	regulation of cell adhesion	Biological process	4.10894	7.78149e-05	down
									GO:0016050	vesicle organization	Biological process	4.10321	7.88473e-05	down
									GO:1904036	negative regulation of epithelial cell apoptotic process	Biological process	3.95953	0.000109768	down
									GO:0060055	angiogenesis involved in wound healing	Biological process	3.95186	0.000111722	down
									GO:0060669	embryonic placenta morphogenesis	Biological process	3.72589	0.000187979	down
									GO:0061025	membrane fusion	Biological process	3.70817	0.000195807	down
									GO:1904035	regulation of epithelial cell apoptotic process	Biological process	3.58463	0.000260238	down
									GO:0031589	cell-substrate adhesion	Biological process	3.41779	0.000382126	down
									GO:0048731	system development	Biological process	3.41108	0.000388078	down
									GO:2000352	negative regulation of endothelial cell apoptotic process	Biological process	3.35393	0.000442663	down
									GO:0034446	substrate adhesion-dependent cell spreading	Biological process	3.29393	0.000508243	down
									GO:0043243	positive regulation of protein complex disassembly	Biological process	3.19733	0.000634852	down
									GO:0016192	vesicle-mediated transport	Biological process	3.13565	0.000731733	down
									GO:0009225	nucleotide-sugar metabolic process	Biological process	3.05563	0.000879762	down
									GO:0022008	neurogenesis	Biological process	3.03331	0.000926163	down
									GO:0051179	localization	Biological process	3.0262	0.000941464	down
									GO:0090317	negative regulation of intracellular protein transport	Biological process	3.01128	0.000974365	down
									GO:0007399	nervous system development	Biological process	2.98426	0.0010369	down
									GO:1904019	epithelial cell apoptotic process	Biological process	2.97103	0.00106897	down
									GO:0006486	protein glycosylation	Biological process	2.94419	0.00113714	down
									GO:0043413	macromolecule glycosylation	Biological process	2.94419	0.00113714	down
									GO:0034329	cell junction assembly	Biological process	2.90078	0.00125666	down
									GO:0010799	regulation of peptidyl-threonine phosphorylation	Biological process	2.88578	0.00130083	down
									GO:0048699	generation of neurons	Biological process	2.88167	0.00131318	down
									GO:0043244	regulation of protein complex disassembly	Biological process	2.83881	0.00144939	down
									GO:0070085	glycosylation	Biological process	2.83577	0.00145958	down
									GO:0033043	regulation of organelle organization	Biological process	2.83011	0.00147875	down
									GO:0006810	transport	Biological process	2.82026	0.00151265	down
									GO:0036150	phosphatidylserine acyl-chain remodeling	Biological process	2.74869	0.00178365	down
									GO:0060713	labyrinthine layer morphogenesis	Biological process	2.74869	0.00178365	down
									GO:0022407	regulation of cell-cell adhesion	Biological process	2.68383	0.00207093	down
									GO:0007155	cell adhesion	Biological process	2.66602	0.00215765	down
									GO:0016032	viral process	Biological process	2.6654	0.00216073	down
									GO:0048284	organelle fusion	Biological process	2.6645	0.00216521	down
									GO:0007275	multicellular organism development	Biological process	2.65434	0.00221648	down
									GO:0031344	regulation of cell projection organization	Biological process	2.64581	0.00226043	down
									GO:0009226	nucleotide-sugar biosynthetic process	Biological process	2.63177	0.00233468	down
									GO:0060711	labyrinthine layer development	Biological process	2.62973	0.00234571	down
									GO:0022610	biological adhesion	Biological process	2.62916	0.00234878	down
									GO:0010975	regulation of neuron projection development	Biological process	2.60542	0.00248074	down
									GO:0010823	negative regulation of mitochondrion organization	Biological process	2.56439	0.00272651	down
									GO:2000351	regulation of endothelial cell apoptotic process	Biological process	2.56439	0.00272651	down
									GO:0048878	chemical homeostasis	Biological process	2.56278	0.00273663	down
									GO:0051234	establishment of localization	Biological process	2.54768	0.00283347	down
									GO:0050793	regulation of developmental process	Biological process	2.5438	0.00285891	down
									GO:0007417	central nervous system development	Biological process	2.5225	0.00300262	down
									GO:0022603	regulation of anatomical structure morphogenesis	Biological process	2.51811	0.00303309	down
									GO:0010639	negative regulation of organelle organization	Biological process	2.51744	0.00303781	down
									GO:0071333	cellular response to glucose stimulus	Biological process	2.50954	0.00309356	down
									GO:0060425	lung morphogenesis	Biological process	2.50201	0.00314764	down
									GO:0035295	tube development	Biological process	2.48765	0.00325348	down
									GO:0006457	protein folding	Biological process	2.48317	0.00328726	down
									GO:0045055	regulated exocytosis	Biological process	2.48113	0.00330268	down
									GO:0071331	cellular response to hexose stimulus	Biological process	2.47458	0.00335289	down
									GO:0071326	cellular response to monosaccharide stimulus	Biological process	2.45737	0.00348846	down
									GO:0007420	brain development	Biological process	2.45016	0.0035468	down
									GO:0016079	synaptic vesicle exocytosis	Biological process	2.43306	0.00368924	down
									GO:0002009	morphogenesis of an epithelium	Biological process	2.43037	0.00371216	down
									GO:0001701	in utero embryonic development	Biological process	2.42766	0.00373539	down
									GO:0001892	embryonic placenta development	Biological process	2.41201	0.00387251	down
									GO:0007044	cell-substrate junction assembly	Biological process	2.41201	0.00387251	down
									GO:0051129	negative regulation of cellular component organization	Biological process	2.39668	0.00401167	down
									GO:0048513	animal organ development	Biological process	2.39397	0.00403672	down
									GO:0006379	mRNA cleavage	Biological process	2.38323	0.00413779	down
									GO:0036065	fucosylation	Biological process	2.38323	0.00413779	down
									GO:0033500	carbohydrate homeostasis	Biological process	2.38233	0.00414643	down
									GO:0042593	glucose homeostasis	Biological process	2.38233	0.00414643	down
									GO:0046907	intracellular transport	Biological process	2.38101	0.00415901	down
									GO:0072577	endothelial cell apoptotic process	Biological process	2.35755	0.00438987	down
									GO:0051649	establishment of localization in cell	Biological process	2.35368	0.00442918	down
									GO:0034330	cell junction organization	Biological process	2.34318	0.00453749	down
									GO:0032879	regulation of localization	Biological process	2.34127	0.00455756	down
									GO:0010800	positive regulation of peptidyl-threonine phosphorylation	Biological process	2.33952	0.00457596	down
									GO:0034698	response to gonadotropin	Biological process	2.33952	0.00457596	down
									GO:0071322	cellular response to carbohydrate stimulus	Biological process	2.32564	0.0047245	down
									GO:0098609	cell-cell adhesion	Biological process	2.32313	0.00475192	down
									GO:0120035	regulation of plasma membrane bounded cell projection organization	Biological process	2.31897	0.00479771	down
									GO:0044403	symbiont process	Biological process	2.31731	0.00481609	down
									GO:0040012	regulation of locomotion	Biological process	2.30804	0.00491993	down
									GO:0032387	negative regulation of intracellular transport	Biological process	2.30386	0.00496753	down
									GO:0006658	phosphatidylserine metabolic process	Biological process	2.29747	0.00504117	down
									GO:0018108	peptidyl-tyrosine phosphorylation	Biological process	2.29573	0.00506134	down
									GO:0001678	cellular glucose homeostasis	Biological process	2.29428	0.00507826	down
									GO:0048856	anatomical structure development	Biological process	2.272	0.00534569	down
									GO:0018212	peptidyl-tyrosine modification	Biological process	2.27061	0.00536279	down
									GO:0050767	regulation of neurogenesis	Biological process	2.25811	0.00551939	down
									GO:1902235	regulation of endoplasmic reticulum stress-induced intrinsic apoptotic signaling pathway	Biological process	2.25697	0.00553386	down
									GO:0009653	anatomical structure morphogenesis	Biological process	2.25188	0.00559906	down
									GO:0032502	developmental process	Biological process	2.22241	0.00599231	down
									GO:0043009	chordate embryonic development	Biological process	2.20905	0.00617939	down
									GO:0060322	head development	Biological process	2.20673	0.00621257	down
									GO:0006887	exocytosis	Biological process	2.19027	0.00645248	down
									GO:0045785	positive regulation of cell adhesion	Biological process	2.189	0.00647149	down
									GO:0030154	cell differentiation	Biological process	2.1819	0.00657811	down
									GO:0060429	epithelium development	Biological process	2.17486	0.00668558	down
									GO:0001764	neuron migration	Biological process	2.17458	0.00668992	down
									GO:0031175	neuron projection development	Biological process	2.17373	0.00670304	down
									GO:1903828	negative regulation of cellular protein localization	Biological process	2.16214	0.00688424	down
									GO:0043117	positive regulation of vascular permeability	Biological process	2.15775	0.00695428	down
									GO:0044650	adhesion of symbiont to host cell	Biological process	2.15775	0.00695428	down
									GO:0045722	positive regulation of gluconeogenesis	Biological process	2.15775	0.00695428	down
									GO:0060433	bronchus development	Biological process	2.15775	0.00695428	down
									GO:0060856	establishment of blood-brain barrier	Biological process	2.15775	0.00695428	down
									GO:0070106	interleukin-27-mediated signaling pathway	Biological process	2.15775	0.00695428	down
									GO:1901096	regulation of autophagosome maturation	Biological process	2.15775	0.00695428	down
									GO:0045216	cell-cell junction organization	Biological process	2.15764	0.00695608	down
									GO:1901342	regulation of vasculature development	Biological process	2.15724	0.00696236	down
									GO:0009101	glycoprotein biosynthetic process	Biological process	2.15306	0.00702978	down
									GO:0060548	negative regulation of cell death	Biological process	2.15219	0.00704384	down
									GO:0007269	neurotransmitter secretion	Biological process	2.146	0.00714491	down
									GO:0099643	signal release from synapse	Biological process	2.146	0.00714491	down
									GO:0045766	positive regulation of angiogenesis	Biological process	2.11769	0.00762621	down
									GO:0016331	morphogenesis of embryonic epithelium	Biological process	2.10409	0.00786881	down
									GO:0018193	peptidyl-amino acid modification	Biological process	2.10007	0.00794206	down
									GO:0035239	tube morphogenesis	Biological process	2.09921	0.00795775	down
									GO:0044419	interspecies interaction between organisms	Biological process	2.09425	0.0080491	down
									GO:0009792	embryo development ending in birth or egg hatching	Biological process	2.09356	0.0080619	down
									GO:0048729	tissue morphogenesis	Biological process	2.08903	0.00814649	down
									GO:0098789	pre-mRNA cleavage required for polyadenylation	Biological process	2.0819	0.00828137	down
									GO:0048869	cellular developmental process	Biological process	2.08055	0.00830715	down
									GO:0001890	placenta development	Biological process	2.07676	0.00837985	down
									GO:0070741	response to interleukin-6	Biological process	2.0745	0.00842361	down
									GO:0097352	autophagosome maturation	Biological process	2.0745	0.00842361	down
									GO:0006369	termination of RNA polymerase II transcription	Biological process	2.06431	0.00862369	down
									GO:0009790	embryo development	Biological process	2.06289	0.00865194	down
									GO:0010721	negative regulation of cell development	Biological process	2.0452	0.00901146	down
									GO:0048598	embryonic morphogenesis	Biological process	2.04417	0.00903296	down
									GO:0019068	virion assembly	Biological process	2.04147	0.00908924	down
									GO:0008219	cell death	Biological process	2.03286	0.00927136	down
									GO:0055082	cellular chemical homeostasis	Biological process	2.0328	0.00927265	down
									GO:0032535	regulation of cellular component size	Biological process	2.02091	0.00952992	down
									GO:2000145	regulation of cell motility	Biological process	2.01637	0.00963014	down
									GO:0030182	neuron differentiation	Biological process	2.01556	0.009648	down
									GO:0070307	lens fiber cell development	Biological process	2.01267	0.00971237	down
									GO:1900025	negative regulation of substrate adhesion-dependent cell spreading	Biological process	2.01267	0.00971237	down
									GO:2000010	positive regulation of protein localization to cell surface	Biological process	2.01267	0.00971237	down
									GO:0099531	presynaptic process involved in chemical synaptic transmission	Biological process	1.99758	0.0100558	down
									GO:0043066	negative regulation of apoptotic process	Biological process	1.98312	0.0103963	down
									GO:0012501	programmed cell death	Biological process	1.97993	0.0104731	down
									GO:0007045	cell-substrate adherens junction assembly	Biological process	1.97986	0.0104747	down
									GO:0048041	focal adhesion assembly	Biological process	1.97986	0.0104747	down
									GO:0070268	cornification	Biological process	1.97985	0.010475	down
									GO:0071377	cellular response to glucagon stimulus	Biological process	1.97837	0.0105105	down
									GO:0045664	regulation of neuron differentiation	Biological process	1.96047	0.010953	down
									GO:0045765	regulation of angiogenesis	Biological process	1.95818	0.0110107	down
									GO:0030334	regulation of cell migration	Biological process	1.95119	0.0111895	down
									GO:0043087	regulation of GTPase activity	Biological process	1.9492	0.011241	down
									GO:0044406	adhesion of symbiont to host	Biological process	1.94905	0.0112447	down
									GO:0046348	amino sugar catabolic process	Biological process	1.94905	0.0112447	down
									GO:0072109	glomerular mesangium development	Biological process	1.94905	0.0112447	down
									GO:0042060	wound healing	Biological process	1.94548	0.0113375	down
									GO:0051270	regulation of cellular component movement	Biological process	1.94367	0.0113849	down
									GO:0007032	endosome organization	Biological process	1.93971	0.0114893	down
									GO:0017156	calcium ion regulated exocytosis	Biological process	1.934	0.0116412	down
									GO:0032984	protein-containing complex disassembly	Biological process	1.93334	0.0116589	down
									GO:0060284	regulation of cell development	Biological process	1.92717	0.0118257	down
									GO:0043069	negative regulation of programmed cell death	Biological process	1.92268	0.0119488	down
									GO:0048568	embryonic organ development	Biological process	1.9202	0.0120171	down
									GO:0051049	regulation of transport	Biological process	1.9135	0.012204	down
									GO:2001234	negative regulation of apoptotic signaling pathway	Biological process	1.89713	0.0126727	down
									GO:0098787	mRNA cleavage involved in mRNA processing	Biological process	1.89023	0.0128758	down
									GO:0018107	peptidyl-threonine phosphorylation	Biological process	1.88965	0.0128929	down
									GO:0048468	cell development	Biological process	1.88934	0.0129021	down
									GO:0048646	anatomical structure formation involved in morphogenesis	Biological process	1.88164	0.0131329	down
									GO:1904018	positive regulation of vasculature development	Biological process	1.87667	0.0132841	down
									GO:0045595	regulation of cell differentiation	Biological process	1.87626	0.0132966	down
									GO:0048489	synaptic vesicle transport	Biological process	1.87518	0.0133296	down
									GO:0097480	establishment of synaptic vesicle localization	Biological process	1.87518	0.0133296	down
									GO:0006906	vesicle fusion	Biological process	1.87425	0.0133583	down
									GO:0023061	signal release	Biological process	1.87209	0.0134248	down
									GO:0032527	protein exit from endoplasmic reticulum	Biological process	1.86266	0.0137196	down
									GO:0030324	lung development	Biological process	1.86247	0.0137256	down
									GO:0050770	regulation of axonogenesis	Biological process	1.86247	0.0137256	down
									GO:0051224	negative regulation of protein transport	Biological process	1.86247	0.0137256	down
									GO:0043085	positive regulation of catalytic activity	Biological process	1.85657	0.0139133	down
									GO:0061077	chaperone-mediated protein folding	Biological process	1.84479	0.014296	down
									GO:0097191	extrinsic apoptotic signaling pathway	Biological process	1.83654	0.01457	down
									GO:0006004	fucose metabolic process	Biological process	1.83555	0.0146032	down
									GO:0001932	regulation of protein phosphorylation	Biological process	1.83151	0.0147397	down
									GO:0006886	intracellular protein transport	Biological process	1.83087	0.0147614	down
									GO:0005975	carbohydrate metabolic process	Biological process	1.82465	0.0149744	down
									GO:0060341	regulation of cellular localization	Biological process	1.82375	0.0150054	down
									GO:0005996	monosaccharide metabolic process	Biological process	1.82253	0.0150477	down
									GO:0030323	respiratory tube development	Biological process	1.81628	0.0152657	down
									GO:0090174	organelle membrane fusion	Biological process	1.81628	0.0152657	down
									GO:1904950	negative regulation of establishment of protein localization	Biological process	1.81628	0.0152657	down
									GO:0051345	positive regulation of hydrolase activity	Biological process	1.80677	0.0156039	down
									GO:0010769	regulation of cell morphogenesis involved in differentiation	Biological process	1.80529	0.0156571	down
									GO:0001704	formation of primary germ layer	Biological process	1.80513	0.015663	down
									GO:0051960	regulation of nervous system development	Biological process	1.80022	0.0158408	down
									GO:0051493	regulation of cytoskeleton organization	Biological process	1.79748	0.0159411	down
									GO:0001525	angiogenesis	Biological process	1.7973	0.0159479	down
									GO:0043408	regulation of MAPK cascade	Biological process	1.79211	0.0161395	down
									GO:0034333	adherens junction assembly	Biological process	1.79126	0.016171	down
									GO:0022411	cellular component disassembly	Biological process	1.78593	0.0163708	down
									GO:0071636	positive regulation of transforming growth factor beta production	Biological process	1.78451	0.0164245	down
									GO:2000026	regulation of multicellular organismal development	Biological process	1.78215	0.016514	down
									GO:0097479	synaptic vesicle localization	Biological process	1.77812	0.016668	down
									GO:0000422	autophagy of mitochondrion	Biological process	1.77395	0.0168287	down
									GO:0061726	mitochondrion disassembly	Biological process	1.77395	0.0168287	down
									GO:0007154	cell communication	Biological process	1.76808	0.0170577	down
									GO:0051641	cellular localization	Biological process	1.7565	0.0175187	down
									GO:1901655	cellular response to ketone	Biological process	1.74008	0.0181936	down
									GO:0009084	glutamine family amino acid biosynthetic process	Biological process	1.73667	0.0183372	down
									GO:0019318	hexose metabolic process	Biological process	1.73139	0.0185615	down
									GO:0050731	positive regulation of peptidyl-tyrosine phosphorylation	Biological process	1.7282	0.0186981	down
									GO:0006672	ceramide metabolic process	Biological process	1.72351	0.0189012	down
									GO:1900024	regulation of substrate adhesion-dependent cell spreading	Biological process	1.71066	0.0194689	down
									GO:0044093	positive regulation of molecular function	Biological process	1.70924	0.0195328	down
									GO:0001942	hair follicle development	Biological process	1.70718	0.0196255	down
									GO:0007219	Notch signaling pathway	Biological process	1.70703	0.0196323	down
									GO:0099504	synaptic vesicle cycle	Biological process	1.70033	0.0199377	down
									GO:0032940	secretion by cell	Biological process	1.69358	0.0202498	down
									GO:0042110	T cell activation	Biological process	1.69173	0.0203362	down
									GO:0060438	trachea development	Biological process	1.69167	0.0203389	down
									GO:1902236	negative regulation of endoplasmic reticulum stress-induced intrinsic apoptotic signaling pathway	Biological process	1.69167	0.0203389	down
									GO:0010771	negative regulation of cell morphogenesis involved in differentiation	Biological process	1.69108	0.0203669	down
									GO:0009888	tissue development	Biological process	1.6828	0.0207589	down
									GO:0031667	response to nutrient levels	Biological process	1.67954	0.0209149	down
									GO:0070887	cellular response to chemical stimulus	Biological process	1.67847	0.0209669	down
									GO:0022404	molting cycle process	Biological process	1.6752	0.0211252	down
									GO:0022405	hair cycle process	Biological process	1.6752	0.0211252	down
									GO:0031124	mRNA 3'-end processing	Biological process	1.6752	0.0211252	down
									GO:0098773	skin epidermis development	Biological process	1.6752	0.0211252	down
									GO:0042886	amide transport	Biological process	1.67419	0.0211744	down
									GO:0050730	regulation of peptidyl-tyrosine phosphorylation	Biological process	1.66818	0.0214693	down
									GO:0019725	cellular homeostasis	Biological process	1.66736	0.0215101	down
									GO:0033762	response to glucagon	Biological process	1.66478	0.0216379	down
									GO:0009611	response to wounding	Biological process	1.66251	0.0217517	down
									GO:0022604	regulation of cell morphogenesis	Biological process	1.66143	0.0218056	down
									GO:0048514	blood vessel morphogenesis	Biological process	1.65751	0.0220034	down
									GO:0023051	regulation of signaling	Biological process	1.6507	0.0223512	down
									GO:0070374	positive regulation of ERK1 and ERK2 cascade	Biological process	1.65062	0.0223551	down
									GO:0006491	N-glycan processing	Biological process	1.64922	0.0224275	down
									GO:0031290	retinal ganglion cell axon guidance	Biological process	1.64922	0.0224275	down
									GO:0035455	response to interferon-alpha	Biological process	1.64922	0.0224275	down
									GO:0035584	calcium-mediated signaling using intracellular calcium source	Biological process	1.64922	0.0224275	down
									GO:0097734	extracellular exosome biogenesis	Biological process	1.64922	0.0224275	down
									GO:0010662	regulation of striated muscle cell apoptotic process	Biological process	1.64264	0.02277	down
									GO:0061448	connective tissue development	Biological process	1.64192	0.0228074	down
									GO:0048666	neuron development	Biological process	1.63293	0.0232847	down
									GO:0015031	protein transport	Biological process	1.63047	0.0234171	down
									GO:0009100	glycoprotein metabolic process	Biological process	1.6292	0.0234853	down
									GO:0010941	regulation of cell death	Biological process	1.62915	0.023488	down
									GO:0018210	peptidyl-threonine modification	Biological process	1.62705	0.023602	down
									GO:0099003	vesicle-mediated transport in synapse	Biological process	1.62705	0.023602	down
									GO:0009749	response to glucose	Biological process	1.6255	0.0236867	down
									GO:0051239	regulation of multicellular organismal process	Biological process	1.62154	0.0239033	down
									GO:0006458	'de novo' protein folding	Biological process	1.62099	0.0239338	down
									GO:0032781	positive regulation of ATPase activity	Biological process	1.62099	0.0239338	down
									GO:0061178	regulation of insulin secretion involved in cellular response to glucose stimulus	Biological process	1.62099	0.0239338	down
									GO:0072073	kidney epithelium development	Biological process	1.61525	0.0242522	down
									GO:0071702	organic substance transport	Biological process	1.61385	0.0243305	down
									GO:0014020	primary neural tube formation	Biological process	1.61384	0.0243308	down
									GO:0003094	glomerular filtration	Biological process	1.60906	0.0246005	down
									GO:0010810	regulation of cell-substrate adhesion	Biological process	1.60587	0.0247817	down
									GO:0007268	chemical synaptic transmission	Biological process	1.60348	0.0249186	down
									GO:0098916	anterograde trans-synaptic signaling	Biological process	1.60348	0.0249186	down
									GO:0002011	morphogenesis of an epithelial sheet	Biological process	1.59982	0.0251292	down
									GO:0051893	regulation of focal adhesion assembly	Biological process	1.59982	0.0251292	down
									GO:0090109	regulation of cell-substrate junction assembly	Biological process	1.59982	0.0251292	down
									GO:0010646	regulation of cell communication	Biological process	1.5966	0.0253165	down
									GO:0010770	positive regulation of cell morphogenesis involved in differentiation	Biological process	1.59198	0.0255869	down
									GO:0006836	neurotransmitter transport	Biological process	1.59084	0.0256545	down
									GO:0099537	trans-synaptic signaling	Biological process	1.58903	0.0257615	down
									GO:0009746	response to hexose	Biological process	1.58653	0.0259102	down
									GO:0060541	respiratory system development	Biological process	1.58653	0.0259102	down
									GO:0042981	regulation of apoptotic process	Biological process	1.5855	0.0259719	down
									GO:0061024	membrane organization	Biological process	1.58527	0.0259852	down
									GO:0001568	blood vessel development	Biological process	1.58505	0.0259984	down
									GO:0099536	synaptic signaling	Biological process	1.58424	0.0260472	down
									GO:0010658	striated muscle cell apoptotic process	Biological process	1.57912	0.0263563	down
									GO:0046605	regulation of centrosome cycle	Biological process	1.57912	0.0263563	down
									GO:0006972	hyperosmotic response	Biological process	1.57096	0.0268558	down
									GO:0031440	regulation of mRNA 3'-end processing	Biological process	1.57096	0.0268558	down
									GO:0097205	renal filtration	Biological process	1.57096	0.0268558	down
									GO:0140112	extracellular vesicle biogenesis	Biological process	1.57096	0.0268558	down
									GO:0051650	establishment of vesicle localization	Biological process	1.56598	0.0271656	down
									GO:0033627	cell adhesion mediated by integrin	Biological process	1.55885	0.027615	down
									GO:0045321	leukocyte activation	Biological process	1.5481	0.0283072	down
									GO:0001505	regulation of neurotransmitter levels	Biological process	1.54571	0.0284638	down
									GO:0043067	regulation of programmed cell death	Biological process	1.5457	0.028464	down
									GO:0034284	response to monosaccharide	Biological process	1.53941	0.0288796	down
									GO:1903391	regulation of adherens junction organization	Biological process	1.53902	0.0289053	down
									GO:0033561	regulation of water loss via skin	Biological process	1.53475	0.0291912	down
									GO:0043457	regulation of cellular respiration	Biological process	1.53475	0.0291912	down
									GO:0072012	glomerulus vasculature development	Biological process	1.53475	0.0291912	down
									GO:1900117	regulation of execution phase of apoptosis	Biological process	1.53475	0.0291912	down
									GO:0060627	regulation of vesicle-mediated transport	Biological process	1.53445	0.029211	down
									GO:0090066	regulation of anatomical structure size	Biological process	1.52892	0.0295857	down
									GO:0015833	peptide transport	Biological process	1.52743	0.0296872	down
									GO:0048608	reproductive structure development	Biological process	1.52487	0.0298628	down
									GO:0070372	regulation of ERK1 and ERK2 cascade	Biological process	1.52424	0.0299062	down
									GO:0051128	regulation of cellular component organization	Biological process	1.5188	0.030283	down
									GO:0007162	negative regulation of cell adhesion	Biological process	1.51759	0.0303673	down
									GO:0001775	cell activation	Biological process	1.51658	0.0304381	down
									GO:0042129	regulation of T cell proliferation	Biological process	1.51392	0.0306255	down
									GO:0002064	epithelial cell development	Biological process	1.51195	0.0307647	down
									GO:0072593	reactive oxygen species metabolic process	Biological process	1.5097	0.0309246	down
									GO:0046903	secretion	Biological process	1.50969	0.0309252	down
									GO:0061458	reproductive system development	Biological process	1.50718	0.0311045	down
									GO:0009991	response to extracellular stimulus	Biological process	1.50697	0.0311194	down
									GO:0051253	negative regulation of RNA metabolic process	Biological process	1.50311	0.0313968	down
									GO:0070059	intrinsic apoptotic signaling pathway in response to endoplasmic reticulum stress	Biological process	1.50058	0.0315803	down
									GO:0001841	neural tube formation	Biological process	1.50055	0.0315828	down
									GO:0003309	type B pancreatic cell differentiation	Biological process	1.50025	0.0316044	down
									GO:0008053	mitochondrial fusion	Biological process	1.50025	0.0316044	down
									GO:0035556	intracellular signal transduction	Biological process	1.49438	0.0320345	down
									GO:0071705	nitrogen compound transport	Biological process	1.48965	0.0323856	down
									GO:0050768	negative regulation of neurogenesis	Biological process	1.48628	0.0326377	down
									GO:0010812	negative regulation of cell-substrate adhesion	Biological process	1.48195	0.0329648	down
									GO:0035773	insulin secretion involved in cellular response to glucose stimulus	Biological process	1.48195	0.0329648	down
									GO:0045669	positive regulation of osteoblast differentiation	Biological process	1.48195	0.0329648	down
									GO:0042327	positive regulation of phosphorylation	Biological process	1.48005	0.0331092	down
									GO:0030855	epithelial cell differentiation	Biological process	1.47914	0.0331787	down
									GO:0009952	anterior/posterior pattern specification	Biological process	1.47624	0.033401	down
									GO:0001944	vasculature development	Biological process	1.47487	0.0335065	down
									GO:0051648	vesicle localization	Biological process	1.4709	0.0338144	down
									GO:0036507	protein demannosylation	Biological process	1.46733	0.0340934	down
									GO:0036508	protein alpha-1,2-demannosylation	Biological process	1.46733	0.0340934	down
									GO:0045992	negative regulation of embryonic development	Biological process	1.46733	0.0340934	down
									GO:0061437	renal system vasculature development	Biological process	1.46733	0.0340934	down
									GO:0061440	kidney vasculature development	Biological process	1.46733	0.0340934	down
									GO:0070861	regulation of protein exit from endoplasmic reticulum	Biological process	1.46733	0.0340934	down
									GO:0031670	cellular response to nutrient	Biological process	1.46369	0.0343805	down
									GO:0051093	negative regulation of developmental process	Biological process	1.46129	0.0345705	down
									GO:1903008	organelle disassembly	Biological process	1.46098	0.0345958	down
									GO:0000904	cell morphogenesis involved in differentiation	Biological process	1.44666	0.0357557	down
									GO:0016239	positive regulation of macroautophagy	Biological process	1.44579	0.0358274	down
									GO:0007160	cell-matrix adhesion	Biological process	1.44153	0.0361799	down
									GO:2001233	regulation of apoptotic signaling pathway	Biological process	1.44125	0.0362034	down
									GO:0072358	cardiovascular system development	Biological process	1.44111	0.0362149	down
									GO:0030194	positive regulation of blood coagulation	Biological process	1.43585	0.0366562	down
									GO:0035883	enteroendocrine cell differentiation	Biological process	1.43585	0.0366562	down
									GO:0036152	phosphatidylethanolamine acyl-chain remodeling	Biological process	1.43585	0.0366562	down
									GO:1900048	positive regulation of hemostasis	Biological process	1.43585	0.0366562	down
									GO:0010811	positive regulation of cell-substrate adhesion	Biological process	1.4354	0.0366942	down
									GO:0042325	regulation of phosphorylation	Biological process	1.43423	0.0367938	down
									GO:0051094	positive regulation of developmental process	Biological process	1.42945	0.0372005	down
									GO:0016477	cell migration	Biological process	1.42662	0.0374441	down
									GO:0050789	regulation of biological process	Biological process	1.42378	0.0376893	down
									GO:1901701	cellular response to oxygen-containing compound	Biological process	1.42267	0.0377861	down
									GO:0030168	platelet activation	Biological process	1.42063	0.0379634	down
									GO:0030030	cell projection organization	Biological process	1.41771	0.0382198	down
									GO:0007015	actin filament organization	Biological process	1.41117	0.0387998	down
									GO:0050891	multicellular organismal water homeostasis	Biological process	1.41101	0.0388138	down
									GO:0006353	DNA-templated transcription, termination	Biological process	1.41045	0.0388646	down
									GO:0070371	ERK1 and ERK2 cascade	Biological process	1.40852	0.0390371	down
									GO:0065007	biological regulation	Biological process	1.40794	0.0390894	down
									GO:0031069	hair follicle morphogenesis	Biological process	1.40571	0.0392906	down
									GO:0036151	phosphatidylcholine acyl-chain remodeling	Biological process	1.40571	0.0392906	down
									GO:0050820	positive regulation of coagulation	Biological process	1.40571	0.0392906	down
									GO:0007613	memory	Biological process	1.39819	0.0399768	down
									GO:0051336	regulation of hydrolase activity	Biological process	1.39303	0.0404551	down
									GO:0007569	cell aging	Biological process	1.38608	0.041107	down
									GO:0016358	dendrite development	Biological process	1.38308	0.041392	down
									GO:0001934	positive regulation of protein phosphorylation	Biological process	1.38103	0.0415882	down
									GO:0048710	regulation of astrocyte differentiation	Biological process	1.37681	0.0419946	down
									GO:0071634	regulation of transforming growth factor beta production	Biological process	1.37681	0.0419946	down
									GO:0003002	regionalization	Biological process	1.37631	0.0420429	down
									GO:0023052	signaling	Biological process	1.37612	0.0420609	down
									GO:0042303	molting cycle	Biological process	1.37412	0.0422552	down
									GO:0042633	hair cycle	Biological process	1.37412	0.0422552	down
									GO:1902275	regulation of chromatin organization	Biological process	1.37195	0.0424673	down
									GO:1905475	regulation of protein localization to membrane	Biological process	1.37195	0.0424673	down
									GO:0032386	regulation of intracellular transport	Biological process	1.37014	0.0426442	down
									GO:0045184	establishment of protein localization	Biological process	1.36864	0.0427917	down
									GO:0006665	sphingolipid metabolic process	Biological process	1.36246	0.0434051	down
									GO:0008361	regulation of cell size	Biological process	1.36246	0.0434051	down
									GO:0000902	cell morphogenesis	Biological process	1.3563	0.0440247	down
									GO:0042592	homeostatic process	Biological process	1.35273	0.0443886	down
									GO:0009743	response to carbohydrate	Biological process	1.35093	0.0445728	down
									GO:0007043	cell-cell junction assembly	Biological process	1.35061	0.0446057	down
									GO:0035774	positive regulation of insulin secretion involved in cellular response to glucose stimulus	Biological process	1.34905	0.0447664	down
									GO:0070306	lens fiber cell differentiation	Biological process	1.34905	0.0447664	down
									GO:0071295	cellular response to vitamin	Biological process	1.34905	0.0447664	down
									GO:0071604	transforming growth factor beta production	Biological process	1.34905	0.0447664	down
									GO:0051961	negative regulation of nervous system development	Biological process	1.34711	0.0449667	down
									GO:0008015	blood circulation	Biological process	1.34702	0.0449759	down
									GO:0030104	water homeostasis	Biological process	1.34531	0.0451537	down
									GO:0006950	response to stress	Biological process	1.34383	0.0453071	down
									GO:0031399	regulation of protein modification process	Biological process	1.33757	0.0459649	down
									GO:0003013	circulatory system process	Biological process	1.32762	0.0470302	down
									GO:0007596	blood coagulation	Biological process	1.32638	0.0471652	down
									GO:0048167	regulation of synaptic plasticity	Biological process	1.32532	0.0472806	down
									GO:0010939	regulation of necrotic cell death	Biological process	1.32236	0.0476039	down
									GO:0048730	epidermis morphogenesis	Biological process	1.32236	0.0476039	down
									GO:0048821	erythrocyte development	Biological process	1.32236	0.0476039	down
									GO:1905476	negative regulation of protein localization to membrane	Biological process	1.32236	0.0476039	down
									GO:0007267	cell-cell signaling	Biological process	1.3207	0.0477863	down
									GO:0051607	defense response to virus	Biological process	1.31964	0.0479026	down
									GO:0040017	positive regulation of locomotion	Biological process	1.31803	0.048081	down
									GO:0006915	apoptotic process	Biological process	1.31636	0.0482663	down
									GO:0043534	blood vessel endothelial cell migration	Biological process	1.31623	0.0482806	down
									GO:0046328	regulation of JNK cascade	Biological process	1.31623	0.0482806	down
									GO:0070507	regulation of microtubule cytoskeleton organization	Biological process	1.31623	0.0482806	down
									GO:0031338	regulation of vesicle fusion	Biological process	1.31422	0.0485044	down
									GO:0038034	signal transduction in absence of ligand	Biological process	1.31422	0.0485044	down
									GO:0097192	extrinsic apoptotic signaling pathway in absence of ligand	Biological process	1.31422	0.0485044	down
									GO:1903507	negative regulation of nucleic acid-templated transcription	Biological process	1.3097	0.0490118	down
									GO:0051668	localization within membrane	Biological process	1.3052	0.0495226	down
									GO:0050900	leukocyte migration	Biological process	1.30519	0.0495228	down
									GO:1902679	negative regulation of RNA biosynthetic process	Biological process	1.30354	0.0497122	down
									GO:0043547	positive regulation of GTPase activity	Biological process	1.30262	0.0498177	down
									GO:0120036	plasma membrane bounded cell projection organization	Biological process	1.30239	0.0498442	down
									GO:0050794	regulation of cellular process	Biological process	1.30161	0.0499336	down
									GO:0098805	whole membrane	Cellular component	3.97167	0.000106742	down
									GO:0098588	bounding membrane of organelle	Cellular component	3.89628	0.000126977	down
									GO:0031410	cytoplasmic vesicle	Cellular component	3.44497	0.000358945	down
									GO:0097708	intracellular vesicle	Cellular component	3.43258	0.000369335	down
									GO:0012505	endomembrane system	Cellular component	3.42601	0.000374962	down
									GO:0031982	vesicle	Cellular component	2.89045	0.00128693	down
									GO:0055038	recycling endosome membrane	Cellular component	2.84257	0.00143692	down
									GO:0046658	anchored component of plasma membrane	Cellular component	2.65241	0.00222634	down
									GO:0032588	trans-Golgi network membrane	Cellular component	2.52469	0.00298754	down
									GO:0044424	intracellular part	Cellular component	2.23888	0.00576929	down
									GO:0044433	cytoplasmic vesicle part	Cellular component	2.23437	0.00582948	down
									GO:0031090	organelle membrane	Cellular component	2.15587	0.00698443	down
									GO:0005783	endoplasmic reticulum	Cellular component	2.10679	0.0078201	down
									GO:0005622	intracellular	Cellular component	2.06169	0.00867582	down
									GO:0044464	cell part	Cellular component	1.98132	0.0104396	down
									GO:0005845	mRNA cap binding complex	Cellular component	1.9612	0.0109344	down
									GO:0055037	recycling endosome	Cellular component	1.91431	0.0121811	down
									GO:0005623	cell	Cellular component	1.89966	0.0125991	down
									GO:0034518	RNA cap binding complex	Cellular component	1.84761	0.0142033	down
									GO:0044444	cytoplasmic part	Cellular component	1.83058	0.0147714	down
									GO:0030659	cytoplasmic vesicle membrane	Cellular component	1.82444	0.0149818	down
									GO:0005741	mitochondrial outer membrane	Cellular component	1.76639	0.0171242	down
									GO:0031362	anchored component of external side of plasma membrane	Cellular component	1.74863	0.0178389	down
									GO:0012506	vesicle membrane	Cellular component	1.72932	0.01865	down
									GO:0005849	mRNA cleavage factor complex	Cellular component	1.70359	0.0197884	down
									GO:0005721	pericentric heterochromatin	Cellular component	1.66109	0.0218227	down
									GO:0005794	Golgi apparatus	Cellular component	1.62984	0.0234508	down
									GO:0030667	secretory granule membrane	Cellular component	1.61439	0.0243001	down
									GO:0031224	intrinsic component of membrane	Cellular component	1.60094	0.0250645	down
									GO:0016020	membrane	Cellular component	1.58084	0.0262516	down
									GO:0005882	intermediate filament	Cellular component	1.56581	0.0271766	down
									GO:0016021	integral component of membrane	Cellular component	1.55167	0.0280755	down
									GO:0031233	intrinsic component of external side of plasma membrane	Cellular component	1.54648	0.0284131	down
									GO:0043226	organelle	Cellular component	1.54631	0.0284245	down
									GO:0031968	organelle outer membrane	Cellular component	1.53818	0.0289612	down
									GO:0030054	cell junction	Cellular component	1.52172	0.0300798	down
									GO:0019867	outer membrane	Cellular component	1.52009	0.0301929	down
									GO:0036477	somatodendritic compartment	Cellular component	1.49958	0.031653	down
									GO:0101003	ficolin-1-rich granule membrane	Cellular component	1.47965	0.0331396	down
									GO:0005737	cytoplasm	Cellular component	1.45901	0.0347531	down
									GO:0150034	distal axon	Cellular component	1.44682	0.0357421	down
									GO:0005925	focal adhesion	Cellular component	1.41466	0.0384892	down
									GO:0005924	cell-substrate adherens junction	Cellular component	1.39714	0.0400736	down
									GO:0044431	Golgi apparatus part	Cellular component	1.37631	0.0420427	down
									GO:0030055	cell-substrate junction	Cellular component	1.36844	0.0428119	down
									GO:0031226	intrinsic component of plasma membrane	Cellular component	1.36089	0.0435626	down
									GO:0048471	perinuclear region of cytoplasm	Cellular component	1.34191	0.0455079	down
									GO:0005768	endosome	Cellular component	1.32868	0.046916	down
									GO:0005886	plasma membrane	Cellular component	1.32611	0.0471943	down
									GO:0097458	neuron part	Cellular component	1.31792	0.0480924	down
									GO:0043195	terminal bouton	Cellular component	1.31456	0.0484668	down
									GO:0030867	rough endoplasmic reticulum membrane	Cellular component	1.30803	0.0492007	down
									GO:0001205	transcriptional activator activity, RNA polymerase II distal enhancer sequence-specific DNA binding	Molecular function	3.16085	0.000690474	down
									GO:0008047	enzyme activator activity	Molecular function	2.69439	0.00202121	down
									GO:0001671	ATPase activator activity	Molecular function	2.36388	0.00432634	down
									GO:0000976	transcription regulatory region sequence-specific DNA binding	Molecular function	2.32831	0.00469554	down
									GO:0001158	enhancer sequence-specific DNA binding	Molecular function	2.21425	0.00610587	down
									GO:1990837	sequence-specific double-stranded DNA binding	Molecular function	2.12151	0.00755945	down
									GO:0003705	transcription factor activity, RNA polymerase II distal enhancer sequence-specific binding	Molecular function	2.08483	0.00822556	down
									GO:0048487	beta-tubulin binding	Molecular function	2.01147	0.00973936	down
									GO:0008417	fucosyltransferase activity	Molecular function	1.96825	0.0107584	down
									GO:0035326	enhancer binding	Molecular function	1.96624	0.0108083	down
									GO:0044212	transcription regulatory region DNA binding	Molecular function	1.91497	0.0121627	down
									GO:0001067	regulatory region nucleic acid binding	Molecular function	1.91016	0.0122983	down
									GO:0060589	nucleoside-triphosphatase regulator activity	Molecular function	1.86249	0.013725	down
									GO:0000980	RNA polymerase II distal enhancer sequence-specific DNA binding	Molecular function	1.86185	0.013745	down
									GO:0072341	modified amino acid binding	Molecular function	1.86185	0.013745	down
									GO:0001786	phosphatidylserine binding	Molecular function	1.82856	0.0148403	down
									GO:0060590	ATPase regulator activity	Molecular function	1.80103	0.0158114	down
									GO:0000977	RNA polymerase II regulatory region sequence-specific DNA binding	Molecular function	1.764	0.0172185	down
									GO:0001012	RNA polymerase II regulatory region DNA binding	Molecular function	1.74816	0.0178583	down
									GO:0003690	double-stranded DNA binding	Molecular function	1.70264	0.0198315	down
									GO:0000149	SNARE binding	Molecular function	1.66265	0.0217447	down
									GO:0030296	protein tyrosine kinase activator activity	Molecular function	1.64834	0.022473	down
									GO:0042803	protein homodimerization activity	Molecular function	1.60321	0.0249339	down
									GO:0016247	channel regulator activity	Molecular function	1.59987	0.0251263	down
									GO:0017137	Rab GTPase binding	Molecular function	1.57629	0.0265281	down
									GO:0019905	syntaxin binding	Molecular function	1.55477	0.0278757	down
									GO:0015293	symporter activity	Molecular function	1.51711	0.0304009	down
									GO:0000983	transcription factor activity, RNA polymerase II core promoter sequence-specific DNA binding	Molecular function	1.49213	0.0322007	down
									GO:0030159	receptor signaling complex scaffold activity	Molecular function	1.45782	0.0348485	down
									GO:1901981	phosphatidylinositol phosphate binding	Molecular function	1.45053	0.035438	down
									GO:0043565	sequence-specific DNA binding	Molecular function	1.37859	0.0418225	down
									GO:0046875	ephrin receptor binding	Molecular function	1.36381	0.0432704	down
									GO:0005342	organic acid transmembrane transporter activity	Molecular function	1.34757	0.0449195	down
									GO:0046943	carboxylic acid transmembrane transporter activity	Molecular function	1.34757	0.0449195	down

## Sheet: Table S5
Table S5: GO annotation of the differentially expressed miRNA targets in PBMCs infected with HIV-1/HIV-2
Table S5.1: HIV-1 infected PBMCs								Table S5.2: HIV-2 infected PBMCs
GO.ID	Term	Ontology	Enrichment.Score	p-value	Targeted pathways modulated by up/down regulated miRNAs			GO.ID	Term	Ontology	Enrichment.Score	p-value	Targeted pathways modulated by up/down regulated miRNAs
GO:0007275	multicellular organism development	Biological process	14.79	1.62166e-15	up			GO:0007156	homophilic cell adhesion via plasma membrane adhesion molecules	Biological process	11.7868	1.63377e-12	up
GO:0048731	system development	Biological process	13.8483	1.418e-14	up			GO:0098742	cell-cell adhesion via plasma-membrane adhesion molecules	Biological process	9.14429	7.17311e-10	up
GO:0048856	anatomical structure development	Biological process	13.7567	1.75119e-14	up			GO:0007267	cell-cell signaling	Biological process	6.42214	3.78322e-07	up
GO:0007399	nervous system development	Biological process	13.2812	5.23353e-14	up			GO:0007399	nervous system development	Biological process	3.83688	0.000145585	up
GO:0032502	developmental process	Biological process	12.5565	2.7764e-13	up			GO:0098609	cell-cell adhesion	Biological process	3.39118	0.000406278	up
GO:0032501	multicellular organismal process	Biological process	9.68275	2.0761e-10	up			GO:0034250	positive regulation of cellular amide metabolic process	Biological process	3.08881	0.000815062	up
GO:0048522	positive regulation of cellular process	Biological process	9.38782	4.09428e-10	up			GO:0072202	cell differentiation involved in metanephros development	Biological process	2.97252	0.00106532	up
GO:0048518	positive regulation of biological process	Biological process	9.08404	8.24071e-10	up			GO:0046394	carboxylic acid biosynthetic process	Biological process	2.77016	0.00169763	up
GO:0007267	cell-cell signaling	Biological process	6.82716	1.48881e-07	up			GO:0016053	organic acid biosynthetic process	Biological process	2.76254	0.00172765	up
GO:0048513	animal organ development	Biological process	6.3987	3.99302e-07	up			GO:0007155	cell adhesion	Biological process	2.72615	0.00187867	up
GO:0030154	cell differentiation	Biological process	6.3817	4.15241e-07	up			GO:0022610	biological adhesion	Biological process	2.69501	0.00201831	up
GO:0022008	neurogenesis	Biological process	6.20215	6.27845e-07	up			GO:0050805	negative regulation of synaptic transmission	Biological process	2.59108	0.00256403	up
GO:0098609	cell-cell adhesion	Biological process	6.12735	7.45849e-07	up			GO:0008089	anterograde axonal transport	Biological process	2.49104	0.0032282	up
GO:0048699	generation of neurons	Biological process	5.97399	1.06171e-06	up			GO:0031328	positive regulation of cellular biosynthetic process	Biological process	2.46361	0.0034387	up
GO:0045595	regulation of cell differentiation	Biological process	5.83468	1.46324e-06	up			GO:1903047	mitotic cell cycle process	Biological process	2.45365	0.00351846	up
GO:0048869	cellular developmental process	Biological process	5.67507	2.11315e-06	up			GO:0048731	system development	Biological process	2.42624	0.00374762	up
GO:0098742	cell-cell adhesion via plasma-membrane adhesion molecules	Biological process	5.66629	2.1563e-06	up			GO:0060965	negative regulation of gene silencing by miRNA	Biological process	2.41977	0.00380388	up
GO:0010646	regulation of cell communication	Biological process	5.28459	5.19286e-06	up			GO:0097201	negative regulation of transcription from RNA polymerase II promoter in response to stress	Biological process	2.41977	0.00380388	up
GO:0023051	regulation of signaling	Biological process	5.23905	5.767e-06	up			GO:0099563	modification of synaptic structure	Biological process	2.41977	0.00380388	up
GO:0065009	regulation of molecular function	Biological process	5.17762	6.64318e-06	up			GO:1904953	Wnt signaling pathway involved in midbrain dopaminergic neuron differentiation	Biological process	2.41977	0.00380388	up
GO:0007417	central nervous system development	Biological process	5.12178	7.55483e-06	up			GO:0072210	metanephric nephron development	Biological process	2.39682	0.00401033	up
GO:0007155	cell adhesion	Biological process	5.10815	7.79556e-06	up			GO:0048814	regulation of dendrite morphogenesis	Biological process	2.38965	0.0040771	up
GO:0051049	regulation of transport	Biological process	5.08722	8.18045e-06	up			GO:0009891	positive regulation of biosynthetic process	Biological process	2.37358	0.00423073	up
GO:0022610	biological adhesion	Biological process	4.97319	1.06368e-05	up			GO:0003337	mesenchymal to epithelial transition involved in metanephros morphogenesis	Biological process	2.34945	0.00447254	up
GO:0023052	signaling	Biological process	4.79346	1.60895e-05	up			GO:0002064	epithelial cell development	Biological process	2.2995	0.00501766	up
GO:0007154	cell communication	Biological process	4.7336	1.84673e-05	up			GO:0035850	epithelial cell differentiation involved in kidney development	Biological process	2.28245	0.00521855	up
GO:0051173	positive regulation of nitrogen compound metabolic process	Biological process	4.5787	2.63813e-05	up			GO:0098930	axonal transport	Biological process	2.25562	0.00555108	up
GO:0009725	response to hormone	Biological process	4.45518	3.50603e-05	up			GO:0097327	response to antineoplastic agent	Biological process	2.24773	0.00565283	up
GO:0008361	regulation of cell size	Biological process	4.41672	3.83075e-05	up			GO:0031657	regulation of cyclin-dependent protein serine/threonine kinase activity involved in G1/S transition of mitotic cell cycle	Biological process	2.22479	0.00595946	up
GO:0060322	head development	Biological process	4.39113	4.06324e-05	up			GO:0050774	negative regulation of dendrite morphogenesis	Biological process	2.22479	0.00595946	up
GO:0045597	positive regulation of cell differentiation	Biological process	4.38073	4.16172e-05	up			GO:0060149	negative regulation of posttranscriptional gene silencing	Biological process	2.22479	0.00595946	up
GO:0031325	positive regulation of cellular metabolic process	Biological process	4.32108	4.77442e-05	up			GO:0060967	negative regulation of gene silencing by RNA	Biological process	2.22479	0.00595946	up
GO:0007156	homophilic cell adhesion via plasma membrane adhesion molecules	Biological process	4.28856	5.14566e-05	up			GO:1903798	regulation of production of miRNAs involved in gene silencing by miRNA	Biological process	2.22479	0.00595946	up
GO:0097479	synaptic vesicle localization	Biological process	4.14028	7.23974e-05	up			GO:0044283	small molecule biosynthetic process	Biological process	2.22091	0.006013	up
GO:0065008	regulation of biological quality	Biological process	4.12766	7.45317e-05	up			GO:0007389	pattern specification process	Biological process	2.21078	0.00615492	up
GO:0030182	neuron differentiation	Biological process	4.07342	8.44456e-05	up			GO:0048856	anatomical structure development	Biological process	2.17948	0.00661479	up
GO:0051179	localization	Biological process	4.01177	9.73254e-05	up			GO:0071071	regulation of phospholipid biosynthetic process	Biological process	2.16902	0.00677611	up
GO:0060341	regulation of cellular localization	Biological process	3.99235	0.000101777	up			GO:0072283	metanephric renal vesicle morphogenesis	Biological process	2.16902	0.00677611	up
GO:0009893	positive regulation of metabolic process	Biological process	3.9729	0.000106439	up			GO:1905314	semi-lunar valve development	Biological process	2.16902	0.00677611	up
GO:0099003	vesicle-mediated transport in synapse	Biological process	3.95329	0.000111355	up			GO:0023052	signaling	Biological process	2.11761	0.00762763	up
GO:0032879	regulation of localization	Biological process	3.90521	0.000124393	up			GO:0070920	regulation of production of small RNA involved in gene silencing by RNA	Biological process	2.11688	0.00764048	up
GO:0045944	positive regulation of transcription by RNA polymerase II	Biological process	3.90445	0.00012461	up			GO:1904948	midbrain dopaminergic neuron differentiation	Biological process	2.11688	0.00764048	up
GO:0007420	brain development	Biological process	3.90232	0.000125221	up			GO:0051301	cell division	Biological process	2.08891	0.00814867	up
GO:0010604	positive regulation of macromolecule metabolic process	Biological process	3.87089	0.00013462	up			GO:0048146	positive regulation of fibroblast proliferation	Biological process	2.0844	0.00823377	up
GO:0099504	synaptic vesicle cycle	Biological process	3.82471	0.000149722	up			GO:0090342	regulation of cell aging	Biological process	2.0844	0.00823377	up
GO:0050793	regulation of developmental process	Biological process	3.81621	0.000152684	up			GO:0007154	cell communication	Biological process	2.08434	0.00823485	up
GO:0044093	positive regulation of molecular function	Biological process	3.77872	0.000166447	up			GO:0000278	mitotic cell cycle	Biological process	2.07721	0.00837126	up
GO:0045935	positive regulation of nucleobase-containing compound metabolic process	Biological process	3.77872	0.000166447	up			GO:0046854	phosphatidylinositol phosphorylation	Biological process	2.07483	0.00841719	up
GO:0051130	positive regulation of cellular component organization	Biological process	3.7599	0.000173819	up			GO:0006206	pyrimidine nucleobase metabolic process	Biological process	2.06794	0.00855179	up
GO:0032870	cellular response to hormone stimulus	Biological process	3.72527	0.000188246	up			GO:0032502	developmental process	Biological process	2.06262	0.00865716	up
GO:0006357	regulation of transcription by RNA polymerase II	Biological process	3.66877	0.000214402	up			GO:0090183	regulation of kidney development	Biological process	2.06203	0.00866899	up
GO:0048489	synaptic vesicle transport	Biological process	3.61831	0.000240817	up			GO:0008088	axo-dendritic transport	Biological process	2.04013	0.00911747	up
GO:0097480	establishment of synaptic vesicle localization	Biological process	3.61831	0.000240817	up			GO:0061005	cell differentiation involved in kidney development	Biological process	2.04013	0.00911747	up
GO:0098693	regulation of synaptic vesicle cycle	Biological process	3.57658	0.000265109	up			GO:0006103	2-oxoglutarate metabolic process	Biological process	2.02185	0.00950926	up
GO:0002694	regulation of leukocyte activation	Biological process	3.52861	0.000296065	up			GO:0072077	renal vesicle morphogenesis	Biological process	2.02185	0.00950926	up
GO:0050772	positive regulation of axonogenesis	Biological process	3.49761	0.000317975	up			GO:0060964	regulation of gene silencing by miRNA	Biological process	2.00341	0.00992189	up
GO:0050789	regulation of biological process	Biological process	3.4505	0.000354409	up			GO:0006732	coenzyme metabolic process	Biological process	1.99644	0.0100823	up
GO:0051254	positive regulation of RNA metabolic process	Biological process	3.42949	0.000371974	up			GO:0046890	regulation of lipid biosynthetic process	Biological process	1.99609	0.0100905	up
GO:0009966	regulation of signal transduction	Biological process	3.42349	0.00037715	up			GO:0007275	multicellular organism development	Biological process	1.98174	0.0104295	up
GO:0023061	signal release	Biological process	3.42331	0.000377307	up			GO:0060231	mesenchymal to epithelial transition	Biological process	1.97831	0.0105121	up
GO:0051249	regulation of lymphocyte activation	Biological process	3.39695	0.000400916	up			GO:0072087	renal vesicle development	Biological process	1.97831	0.0105121	up
GO:0010770	positive regulation of cell morphogenesis involved in differentiation	Biological process	3.39592	0.000401869	up			GO:0032387	negative regulation of intracellular transport	Biological process	1.95681	0.0110457	up
GO:0042127	regulation of cell proliferation	Biological process	3.3829	0.000414091	up			GO:0060147	regulation of posttranscriptional gene silencing	Biological process	1.94908	0.0112439	up
GO:0033148	positive regulation of intracellular estrogen receptor signaling pathway	Biological process	3.35011	0.00044657	up			GO:0060966	regulation of gene silencing by RNA	Biological process	1.94908	0.0112439	up
GO:0006836	neurotransmitter transport	Biological process	3.34509	0.000451767	up			GO:0060065	uterus development	Biological process	1.93706	0.0115597	up
GO:0045893	positive regulation of transcription, DNA-templated	Biological process	3.31496	0.000484213	up			GO:0031325	positive regulation of cellular metabolic process	Biological process	1.93421	0.0116355	up
GO:1903508	positive regulation of nucleic acid-templated transcription	Biological process	3.31496	0.000484213	up			GO:0042177	negative regulation of protein catabolic process	Biological process	1.9228	0.0119455	up
GO:0010557	positive regulation of macromolecule biosynthetic process	Biological process	3.30735	0.000492771	up			GO:0046834	lipid phosphorylation	Biological process	1.90986	0.0123065	up
GO:2000026	regulation of multicellular organismal development	Biological process	3.30705	0.000493115	up			GO:0046578	regulation of Ras protein signal transduction	Biological process	1.90584	0.012421	up
GO:0051239	regulation of multicellular organismal process	Biological process	3.30521	0.00049521	up			GO:0009068	aspartate family amino acid catabolic process	Biological process	1.89787	0.0126511	up
GO:1902680	positive regulation of RNA biosynthetic process	Biological process	3.30224	0.000498611	up			GO:0021895	cerebral cortex neuron differentiation	Biological process	1.89787	0.0126511	up
GO:0018298	protein-chromophore linkage	Biological process	3.29417	0.000507961	up			GO:1901607	alpha-amino acid biosynthetic process	Biological process	1.87969	0.013192	up
GO:0050767	regulation of neurogenesis	Biological process	3.2911	0.00051156	up			GO:0046889	positive regulation of lipid biosynthetic process	Biological process	1.86128	0.0137631	up
GO:0006464	cellular protein modification process	Biological process	3.28641	0.000517116	up			GO:0072215	regulation of metanephros development	Biological process	1.86057	0.0137856	up
GO:0036211	protein modification process	Biological process	3.28641	0.000517116	up			GO:1904888	cranial skeletal system development	Biological process	1.84321	0.0143481	up
GO:0007268	chemical synaptic transmission	Biological process	3.27209	0.000534455	up			GO:0045727	positive regulation of translation	Biological process	1.83506	0.0146199	up
GO:0098916	anterograde trans-synaptic signaling	Biological process	3.27209	0.000534455	up			GO:0046324	regulation of glucose import	Biological process	1.82545	0.014947	up
GO:0060284	regulation of cell development	Biological process	3.23314	0.000584599	up			GO:0060969	negative regulation of gene silencing	Biological process	1.82499	0.0149626	up
GO:0031328	positive regulation of cellular biosynthetic process	Biological process	3.22639	0.000593757	up			GO:0003002	regionalization	Biological process	1.80019	0.0158421	up
GO:0051094	positive regulation of developmental process	Biological process	3.21825	0.000604997	up			GO:0006735	NADH regeneration	Biological process	1.79099	0.0161813	up
GO:0099537	trans-synaptic signaling	Biological process	3.21626	0.000607771	up			GO:0061621	canonical glycolysis	Biological process	1.79099	0.0161813	up
GO:0007610	behavior	Biological process	3.21042	0.000615993	up			GO:0061718	glucose catabolic process to pyruvate	Biological process	1.79099	0.0161813	up
GO:0008283	cell proliferation	Biological process	3.2009	0.000629648	up			GO:0060998	regulation of dendritic spine development	Biological process	1.79084	0.0161868	up
GO:0006366	transcription by RNA polymerase II	Biological process	3.19889	0.000632577	up			GO:0045834	positive regulation of lipid metabolic process	Biological process	1.78768	0.0163051	up
GO:0099536	synaptic signaling	Biological process	3.19781	0.000634147	up			GO:0050804	modulation of chemical synaptic transmission	Biological process	1.78733	0.0163181	up
GO:0050863	regulation of T cell activation	Biological process	3.18291	0.000656281	up			GO:0099177	regulation of trans-synaptic signaling	Biological process	1.78733	0.0163181	up
GO:0050865	regulation of cell activation	Biological process	3.17748	0.000664542	up			GO:0045165	cell fate commitment	Biological process	1.78215	0.0165141	up
GO:0009891	positive regulation of biosynthetic process	Biological process	3.16914	0.000677426	up			GO:0008637	apoptotic mitochondrial changes	Biological process	1.77612	0.0167447	up
GO:0046928	regulation of neurotransmitter secretion	Biological process	3.16314	0.00068685	up			GO:0035270	endocrine system development	Biological process	1.77612	0.0167447	up
GO:0009653	anatomical structure morphogenesis	Biological process	3.13348	0.000735398	up			GO:0007346	regulation of mitotic cell cycle	Biological process	1.77562	0.016764	up
GO:0060627	regulation of vesicle-mediated transport	Biological process	3.13152	0.000738722	up			GO:0061615	glycolytic process through fructose-6-phosphate	Biological process	1.75843	0.0174409	up
GO:0030072	peptide hormone secretion	Biological process	3.12911	0.000742828	up			GO:0061620	glycolytic process through glucose-6-phosphate	Biological process	1.75843	0.0174409	up
GO:0051960	regulation of nervous system development	Biological process	3.11998	0.000758609	up			GO:0072273	metanephric nephron morphogenesis	Biological process	1.75843	0.0174409	up
GO:0007166	cell surface receptor signaling pathway	Biological process	3.10523	0.000784828	up			GO:0090344	negative regulation of cell aging	Biological process	1.75843	0.0174409	up
GO:0017157	regulation of exocytosis	Biological process	3.10206	0.000790571	up			GO:0009855	determination of bilateral symmetry	Biological process	1.75336	0.0176459	up
GO:0051128	regulation of cellular component organization	Biological process	3.09969	0.000794892	up			GO:0009799	specification of symmetry	Biological process	1.74214	0.0181076	up
GO:1903305	regulation of regulated secretory pathway	Biological process	3.09757	0.000798777	up			GO:0031644	regulation of neurological system process	Biological process	1.74108	0.0181519	up
GO:1902803	regulation of synaptic vesicle transport	Biological process	3.08437	0.000823427	up			GO:2000171	negative regulation of dendrite development	Biological process	1.72721	0.0187409	up
GO:0050804	modulation of chemical synaptic transmission	Biological process	3.08151	0.00082887	up			GO:0010605	negative regulation of macromolecule metabolic process	Biological process	1.72715	0.0187434	up
GO:0099177	regulation of trans-synaptic signaling	Biological process	3.08151	0.00082887	up			GO:0010646	regulation of cell communication	Biological process	1.71484	0.0192821	up
GO:0016079	synaptic vesicle exocytosis	Biological process	3.08027	0.000831237	up			GO:0048568	embryonic organ development	Biological process	1.71343	0.0193451	up
GO:0051050	positive regulation of transport	Biological process	3.0791	0.000833485	up			GO:0009895	negative regulation of catabolic process	Biological process	1.70998	0.0194993	up
GO:0031175	neuron projection development	Biological process	3.07338	0.000844547	up			GO:1903725	regulation of phospholipid metabolic process	Biological process	1.69371	0.0202439	up
GO:1901700	response to oxygen-containing compound	Biological process	3.06086	0.000869239	up			GO:0048565	digestive tract development	Biological process	1.68763	0.020529	up
GO:0010769	regulation of cell morphogenesis involved in differentiation	Biological process	3.06038	0.000870204	up			GO:0060968	regulation of gene silencing	Biological process	1.68763	0.020529	up
GO:0042592	homeostatic process	Biological process	3.05468	0.000881701	up			GO:0045861	negative regulation of proteolysis	Biological process	1.68232	0.0207818	up
GO:0043085	positive regulation of catalytic activity	Biological process	3.03186	0.000929274	up			GO:0048523	negative regulation of cellular process	Biological process	1.67824	0.0209776	up
GO:0032535	regulation of cellular component size	Biological process	3.02054	0.000953807	up			GO:0048813	dendrite morphogenesis	Biological process	1.67704	0.021036	up
GO:0045921	positive regulation of exocytosis	Biological process	3.00801	0.000981736	up			GO:0000082	G1/S transition of mitotic cell cycle	Biological process	1.66843	0.0214571	up
GO:0065007	biological regulation	Biological process	2.99315	0.0010159	up			GO:1902230	negative regulation of intrinsic apoptotic signaling pathway in response to DNA damage	Biological process	1.66839	0.0214588	up
GO:0060560	developmental growth involved in morphogenesis	Biological process	2.99184	0.00101897	up			GO:0006090	pyruvate metabolic process	Biological process	1.66654	0.0215506	up
GO:0018146	keratan sulfate biosynthetic process	Biological process	2.97363	0.0010626	up			GO:0050773	regulation of dendrite development	Biological process	1.65614	0.0220729	up
GO:0051588	regulation of neurotransmitter transport	Biological process	2.9711	0.0010688	up			GO:0006094	gluconeogenesis	Biological process	1.64853	0.0224632	up
GO:0017156	calcium ion regulated exocytosis	Biological process	2.96714	0.0010786	up			GO:0006099	tricarboxylic acid cycle	Biological process	1.64063	0.0228755	up
GO:0006884	cell volume homeostasis	Biological process	2.93733	0.00115523	up			GO:1900739	regulation of protein insertion into mitochondrial membrane involved in apoptotic signaling pathway	Biological process	1.64063	0.0228755	up
GO:0016338	calcium-independent cell-cell adhesion via plasma membrane cell-adhesion molecules	Biological process	2.93733	0.00115523	up			GO:1900740	positive regulation of protein insertion into mitochondrial membrane involved in apoptotic signaling pathway	Biological process	1.64063	0.0228755	up
GO:0006812	cation transport	Biological process	2.89957	0.00126017	up			GO:0034762	regulation of transmembrane transport	Biological process	1.63414	0.0232199	up
GO:0032386	regulation of intracellular transport	Biological process	2.88595	0.00130031	up			GO:0010827	regulation of glucose transmembrane transport	Biological process	1.63393	0.0232313	up
GO:0032418	lysosome localization	Biological process	2.87257	0.00134101	up			GO:0071702	organic substance transport	Biological process	1.6336	0.023249	up
GO:0051962	positive regulation of nervous system development	Biological process	2.84579	0.00142631	up			GO:0046323	glucose import	Biological process	1.61954	0.0240135	up
GO:0017158	regulation of calcium ion-dependent exocytosis	Biological process	2.8217	0.00150766	up			GO:0046902	regulation of mitochondrial membrane permeability	Biological process	1.61954	0.0240135	up
GO:1900181	negative regulation of protein localization to nucleus	Biological process	2.81656	0.00152561	up			GO:0048024	regulation of mRNA splicing, via spliceosome	Biological process	1.61954	0.0240135	up
GO:0031468	nuclear envelope reassembly	Biological process	2.81045	0.00154721	up			GO:0023051	regulation of signaling	Biological process	1.61912	0.0240371	up
GO:0042110	T cell activation	Biological process	2.7977	0.00159332	up			GO:0006007	glucose catabolic process	Biological process	1.61386	0.0243296	up
GO:0009887	animal organ morphogenesis	Biological process	2.79586	0.00160006	up			GO:0045736	negative regulation of cyclin-dependent protein serine/threonine kinase activity	Biological process	1.61386	0.0243296	up
GO:0042475	odontogenesis of dentin-containing tooth	Biological process	2.78718	0.00163237	up			GO:0051726	regulation of cell cycle	Biological process	1.60719	0.0247062	up
GO:0010628	positive regulation of gene expression	Biological process	2.78716	0.00163246	up			GO:0019319	hexose biosynthetic process	Biological process	1.60537	0.0248099	up
GO:0008089	anterograde axonal transport	Biological process	2.76526	0.00171687	up			GO:0019216	regulation of lipid metabolic process	Biological process	1.60122	0.0250485	up
GO:0061614	pri-miRNA transcription by RNA polymerase II	Biological process	2.76526	0.00171687	up			GO:0046486	glycerolipid metabolic process	Biological process	1.59905	0.0251739	up
GO:0050770	regulation of axonogenesis	Biological process	2.76282	0.00172657	up			GO:0008652	cellular amino acid biosynthetic process	Biological process	1.59141	0.0256205	up
GO:0038083	peptidyl-tyrosine autophosphorylation	Biological process	2.75696	0.00175	up			GO:0060548	negative regulation of cell death	Biological process	1.59068	0.0256634	up
GO:0021700	developmental maturation	Biological process	2.74331	0.0018059	up			GO:0001844	protein insertion into mitochondrial membrane involved in apoptotic signaling pathway	Biological process	1.58803	0.0258207	up
GO:0071695	anatomical structure maturation	Biological process	2.73075	0.00185888	up			GO:1903311	regulation of mRNA metabolic process	Biological process	1.58258	0.0261468	up
GO:0048167	regulation of synaptic plasticity	Biological process	2.72732	0.00187361	up			GO:0022402	cell cycle process	Biological process	1.58227	0.0261656	up
GO:2001044	regulation of integrin-mediated signaling pathway	Biological process	2.72536	0.00188208	up			GO:0043066	negative regulation of apoptotic process	Biological process	1.58128	0.026225	up
GO:2000300	regulation of synaptic vesicle exocytosis	Biological process	2.70283	0.00198229	up			GO:0034404	nucleobase-containing small molecule biosynthetic process	Biological process	1.56902	0.0269761	up
GO:0001890	placenta development	Biological process	2.6932	0.00202674	up			GO:0055123	digestive system development	Biological process	1.56666	0.0271229	up
GO:0048468	cell development	Biological process	2.68247	0.00207746	up			GO:0043085	positive regulation of catalytic activity	Biological process	1.56617	0.0271539	up
GO:1902893	regulation of pri-miRNA transcription by RNA polymerase II	Biological process	2.67246	0.00212588	up			GO:0051172	negative regulation of nitrogen compound metabolic process	Biological process	1.56436	0.027267	up
GO:0050790	regulation of catalytic activity	Biological process	2.65401	0.00221815	up			GO:0003338	metanephros morphogenesis	Biological process	1.56308	0.0273479	up
GO:0010959	regulation of metal ion transport	Biological process	2.65341	0.00222122	up			GO:0019433	triglyceride catabolic process	Biological process	1.56308	0.0273479	up
GO:0031346	positive regulation of cell projection organization	Biological process	2.64082	0.00228654	up			GO:1904030	negative regulation of cyclin-dependent protein kinase activity	Biological process	1.56308	0.0273479	up
GO:0042063	gliogenesis	Biological process	2.63314	0.00232735	up			GO:0032269	negative regulation of cellular protein metabolic process	Biological process	1.55504	0.0278585	up
GO:0010720	positive regulation of cell development	Biological process	2.63078	0.00234	up			GO:0044843	cell cycle G1/S phase transition	Biological process	1.54478	0.0285248	up
GO:0048666	neuron development	Biological process	2.62683	0.00236138	up			GO:0006101	citrate metabolic process	Biological process	1.53894	0.0289108	up
GO:0071375	cellular response to peptide hormone stimulus	Biological process	2.61962	0.00240093	up			GO:0007616	long-term memory	Biological process	1.53894	0.0289108	up
GO:0006810	transport	Biological process	2.60993	0.00245508	up			GO:0072330	monocarboxylic acid biosynthetic process	Biological process	1.53858	0.0289346	up
GO:0030155	regulation of cell adhesion	Biological process	2.5962	0.00253394	up			GO:0043069	negative regulation of programmed cell death	Biological process	1.53794	0.0289773	up
GO:0009991	response to extracellular stimulus	Biological process	2.59407	0.00254644	up			GO:0007215	glutamate receptor signaling pathway	Biological process	1.53754	0.0290038	up
GO:0050769	positive regulation of neurogenesis	Biological process	2.5905	0.00256743	up			GO:0046364	monosaccharide biosynthetic process	Biological process	1.52455	0.0298849	up
GO:0001892	embryonic placenta development	Biological process	2.58342	0.00260963	up			GO:0016051	carbohydrate biosynthetic process	Biological process	1.52454	0.0298854	up
GO:0009790	embryo development	Biological process	2.58086	0.00262504	up			GO:0046488	phosphatidylinositol metabolic process	Biological process	1.52454	0.0298854	up
GO:1903307	positive regulation of regulated secretory pathway	Biological process	2.56634	0.00271432	up			GO:0001662	behavioral fear response	Biological process	1.51558	0.0305085	up
GO:0016266	O-glycan processing	Biological process	2.56222	0.0027402	up			GO:0002209	behavioral defense response	Biological process	1.51558	0.0305085	up
GO:0021527	spinal cord association neuron differentiation	Biological process	2.56117	0.00274683	up			GO:0051204	protein insertion into mitochondrial membrane	Biological process	1.51558	0.0305085	up
GO:0006887	exocytosis	Biological process	2.54924	0.0028233	up			GO:0048145	regulation of fibroblast proliferation	Biological process	1.51173	0.03078	up
GO:0048598	embryonic morphogenesis	Biological process	2.54531	0.00284899	up			GO:0090559	regulation of membrane permeability	Biological process	1.51173	0.03078	up
GO:0007269	neurotransmitter secretion	Biological process	2.52959	0.00295397	up			GO:0000079	regulation of cyclin-dependent protein serine/threonine kinase activity	Biological process	1.49909	0.0316892	up
GO:0099643	signal release from synapse	Biological process	2.52959	0.00295397	up			GO:0048144	fibroblast proliferation	Biological process	1.49909	0.0316892	up
GO:0050878	regulation of body fluid levels	Biological process	2.51903	0.00302669	up			GO:0009892	negative regulation of metabolic process	Biological process	1.49589	0.0319237	up
GO:0046879	hormone secretion	Biological process	2.51237	0.00307348	up			GO:0003179	heart valve morphogenesis	Biological process	1.49295	0.0321406	up
GO:0043412	macromolecule modification	Biological process	2.49576	0.0031933	up			GO:0006084	acetyl-CoA metabolic process	Biological process	1.49295	0.0321406	up
GO:0042339	keratan sulfate metabolic process	Biological process	2.49394	0.00320669	up			GO:0009260	ribonucleotide biosynthetic process	Biological process	1.49008	0.0323531	up
GO:0044057	regulation of system process	Biological process	2.48418	0.00327963	up			GO:0048519	negative regulation of biological process	Biological process	1.48916	0.0324222	up
GO:0046777	protein autophosphorylation	Biological process	2.4835	0.00328477	up			GO:0010821	regulation of mitochondrion organization	Biological process	1.48871	0.0324557	up
GO:1901701	cellular response to oxygen-containing compound	Biological process	2.48239	0.00329313	up			GO:0001656	metanephros development	Biological process	1.48662	0.0326123	up
GO:0009719	response to endogenous stimulus	Biological process	2.48136	0.00330097	up			GO:0010564	regulation of cell cycle process	Biological process	1.47734	0.0333165	up
GO:0006468	protein phosphorylation	Biological process	2.46959	0.00339162	up			GO:0031324	negative regulation of cellular metabolic process	Biological process	1.4761	0.0334116	up
GO:0090066	regulation of anatomical structure size	Biological process	2.46376	0.00343749	up			GO:0044772	mitotic cell cycle phase transition	Biological process	1.47572	0.0334412	up
GO:0120035	regulation of plasma membrane bounded cell projection organization	Biological process	2.46373	0.0034377	up			GO:0060996	dendritic spine development	Biological process	1.47432	0.0335494	up
GO:0048583	regulation of response to stimulus	Biological process	2.45226	0.00352975	up			GO:0048583	regulation of response to stimulus	Biological process	1.4733	0.033628	up
GO:0031952	regulation of protein autophosphorylation	Biological process	2.44669	0.00357525	up			GO:0042596	fear response	Biological process	1.471	0.0338063	up
GO:0051641	cellular localization	Biological process	2.4432	0.00360416	up			GO:0061001	regulation of dendritic spine morphogenesis	Biological process	1.471	0.0338063	up
GO:0097503	sialylation	Biological process	2.42973	0.00371767	up			GO:0071542	dopaminergic neuron differentiation	Biological process	1.471	0.0338063	up
GO:0010001	glial cell differentiation	Biological process	2.41957	0.00380569	up			GO:1902229	regulation of intrinsic apoptotic signaling pathway in response to DNA damage	Biological process	1.471	0.0338063	up
GO:0048568	embryonic organ development	Biological process	2.41385	0.00385612	up			GO:0046390	ribose phosphate biosynthetic process	Biological process	1.46652	0.0341572	up
GO:0010975	regulation of neuron projection development	Biological process	2.41022	0.00388848	up			GO:0051186	cofactor metabolic process	Biological process	1.46326	0.0344145	up
GO:0048812	neuron projection morphogenesis	Biological process	2.40615	0.0039251	up			GO:0043154	negative regulation of cysteine-type endopeptidase activity involved in apoptotic process	Biological process	1.46218	0.0345004	up
GO:1901653	cellular response to peptide	Biological process	2.40427	0.00394215	up			GO:0031330	negative regulation of cellular catabolic process	Biological process	1.46081	0.0346087	up
GO:0048878	chemical homeostasis	Biological process	2.39246	0.0040508	up			GO:0015849	organic acid transport	Biological process	1.4607	0.0346182	up
GO:0046649	lymphocyte activation	Biological process	2.3838	0.00413242	up			GO:0046942	carboxylic acid transport	Biological process	1.4607	0.0346182	up
GO:0010647	positive regulation of cell communication	Biological process	2.3795	0.00417353	up			GO:0051897	positive regulation of protein kinase B signaling	Biological process	1.45779	0.0348508	up
GO:0045055	regulated exocytosis	Biological process	2.37535	0.00421356	up			GO:0019752	carboxylic acid metabolic process	Biological process	1.45764	0.0348625	up
GO:0007265	Ras protein signal transduction	Biological process	2.37181	0.00424801	up			GO:0009893	positive regulation of metabolic process	Biological process	1.45009	0.0354738	up
GO:2001141	regulation of RNA biosynthetic process	Biological process	2.36808	0.00428465	up			GO:0072350	tricarboxylic acid metabolic process	Biological process	1.44971	0.0355051	up
GO:0010976	positive regulation of neuron projection development	Biological process	2.36477	0.0043175	up			GO:1901030	positive regulation of mitochondrial outer membrane permeabilization involved in apoptotic signaling pathway	Biological process	1.44971	0.0355051	up
GO:0120039	plasma membrane bounded cell projection morphogenesis	Biological process	2.36325	0.00433258	up			GO:0048015	phosphatidylinositol-mediated signaling	Biological process	1.4492	0.0355468	up
GO:0031399	regulation of protein modification process	Biological process	2.35719	0.00439353	up			GO:0071407	cellular response to organic cyclic compound	Biological process	1.44682	0.0357424	up
GO:0030900	forebrain development	Biological process	2.35552	0.00441046	up			GO:0030855	epithelial cell differentiation	Biological process	1.44197	0.0361438	up
GO:0061564	axon development	Biological process	2.35497	0.00441603	up			GO:0009201	ribonucleoside triphosphate biosynthetic process	Biological process	1.44068	0.0362508	up
GO:0007169	transmembrane receptor protein tyrosine kinase signaling pathway	Biological process	2.35033	0.00446349	up			GO:1904029	regulation of cyclin-dependent protein kinase activity	Biological process	1.43837	0.0364441	up
GO:0040007	growth	Biological process	2.34232	0.00454649	up			GO:0043488	regulation of mRNA stability	Biological process	1.43224	0.0369628	up
GO:0051234	establishment of localization	Biological process	2.34003	0.00457054	up			GO:0046661	male sex differentiation	Biological process	1.43224	0.0369628	up
GO:1903506	regulation of nucleic acid-templated transcription	Biological process	2.33652	0.00460766	up			GO:0006734	NADH metabolic process	Biological process	1.42903	0.0372363	up
GO:0031667	response to nutrient levels	Biological process	2.33488	0.00462504	up			GO:0030901	midbrain development	Biological process	1.4267	0.0374367	up
GO:0048858	cell projection morphogenesis	Biological process	2.33214	0.00465432	up			GO:0048017	inositol lipid-mediated signaling	Biological process	1.42386	0.0376829	up
GO:0015816	glycine transport	Biological process	2.32715	0.00470816	up			GO:0010629	negative regulation of gene expression	Biological process	1.41838	0.0381607	up
GO:0042308	negative regulation of protein import into nucleus	Biological process	2.32715	0.00470816	up			GO:0007049	cell cycle	Biological process	1.41585	0.0383839	up
GO:1902337	regulation of apoptotic process involved in morphogenesis	Biological process	2.32715	0.00470816	up			GO:0003170	heart valve development	Biological process	1.40894	0.0389994	up
GO:1904590	negative regulation of protein import	Biological process	2.32715	0.00470816	up			GO:0014911	positive regulation of smooth muscle cell migration	Biological process	1.40894	0.0389994	up
GO:0023056	positive regulation of signaling	Biological process	2.32245	0.00475941	up			GO:0015804	neutral amino acid transport	Biological process	1.40894	0.0389994	up
GO:0043269	regulation of ion transport	Biological process	2.32242	0.00475975	up			GO:0046461	neutral lipid catabolic process	Biological process	1.40894	0.0389994	up
GO:0006811	ion transport	Biological process	2.32095	0.00477584	up			GO:0046464	acylglycerol catabolic process	Biological process	1.40894	0.0389994	up
GO:0006023	aminoglycan biosynthetic process	Biological process	2.31991	0.0047873	up			GO:0051248	negative regulation of protein metabolic process	Biological process	1.40205	0.0396234	up
GO:0061082	myeloid leukocyte cytokine production	Biological process	2.3197	0.0047896	up			GO:0055086	nucleobase-containing small molecule metabolic process	Biological process	1.4006	0.0397558	up
GO:0016049	cell growth	Biological process	2.31718	0.0048175	up			GO:0007519	skeletal muscle tissue development	Biological process	1.39101	0.0406438	up
GO:0032743	positive regulation of interleukin-2 production	Biological process	2.30674	0.00493472	up			GO:0050807	regulation of synapse organization	Biological process	1.39101	0.0406438	up
GO:0016192	vesicle-mediated transport	Biological process	2.30292	0.00497828	up			GO:0009112	nucleobase metabolic process	Biological process	1.38941	0.0407937	up
GO:0031344	regulation of cell projection organization	Biological process	2.30202	0.00498859	up			GO:0047496	vesicle transport along microtubule	Biological process	1.38941	0.0407937	up
GO:0007626	locomotory behavior	Biological process	2.30147	0.0049949	up			GO:0010557	positive regulation of macromolecule biosynthetic process	Biological process	1.38352	0.0413503	up
GO:0042476	odontogenesis	Biological process	2.29505	0.0050693	up			GO:0009166	nucleotide catabolic process	Biological process	1.38296	0.0414042	up
GO:0010033	response to organic substance	Biological process	2.29311	0.00509198	up			GO:0062013	positive regulation of small molecule metabolic process	Biological process	1.38296	0.0414042	up
GO:0006816	calcium ion transport	Biological process	2.28188	0.00522537	up			GO:0009108	coenzyme biosynthetic process	Biological process	1.381	0.0415909	up
GO:0007389	pattern specification process	Biological process	2.28057	0.00524114	up			GO:0006096	glycolytic process	Biological process	1.37053	0.0426055	up
GO:0033145	positive regulation of intracellular steroid hormone receptor signaling pathway	Biological process	2.27755	0.00527774	up			GO:0035196	production of miRNAs involved in gene silencing by miRNA	Biological process	1.3704	0.0426187	up
GO:0046903	secretion	Biological process	2.27063	0.0053625	up			GO:0010822	positive regulation of mitochondrion organization	Biological process	1.36705	0.0429491	up
GO:0048523	negative regulation of cellular process	Biological process	2.2649	0.00543371	up			GO:0043487	regulation of RNA stability	Biological process	1.36705	0.0429491	up
GO:0061337	cardiac conduction	Biological process	2.26262	0.00546237	up			GO:0006757	ATP generation from ADP	Biological process	1.35972	0.0436801	up
GO:0010831	positive regulation of myotube differentiation	Biological process	2.25387	0.00557359	up			GO:0006836	neurotransmitter transport	Biological process	1.35561	0.0440947	up
GO:0030001	metal ion transport	Biological process	2.25024	0.00562033	up			GO:0071548	response to dexamethasone	Biological process	1.3519	0.0444737	up
GO:0018212	peptidyl-tyrosine modification	Biological process	2.24938	0.00563144	up			GO:0072528	pyrimidine-containing compound biosynthetic process	Biological process	1.3519	0.0444737	up
GO:0051240	positive regulation of multicellular organismal process	Biological process	2.24256	0.00572062	up			GO:1903727	positive regulation of phospholipid metabolic process	Biological process	1.3519	0.0444737	up
GO:0070887	cellular response to chemical stimulus	Biological process	2.24194	0.00572874	up			GO:0019362	pyridine nucleotide metabolic process	Biological process	1.35138	0.0445262	up
GO:0050794	regulation of cellular process	Biological process	2.23732	0.00579006	up			GO:0046496	nicotinamide nucleotide metabolic process	Biological process	1.35138	0.0445262	up
GO:0009914	hormone transport	Biological process	2.23722	0.00579137	up			GO:1901137	carbohydrate derivative biosynthetic process	Biological process	1.3505	0.0446171	up
GO:0002279	mast cell activation involved in immune response	Biological process	2.23692	0.00579542	up			GO:0001101	response to acid chemical	Biological process	1.34976	0.0446935	up
GO:0043303	mast cell degranulation	Biological process	2.23692	0.00579542	up			GO:0009142	nucleoside triphosphate biosynthetic process	Biological process	1.34364	0.0453269	up
GO:0051252	regulation of RNA metabolic process	Biological process	2.2352	0.00581833	up			GO:0021953	central nervous system neuron differentiation	Biological process	1.34364	0.0453269	up
GO:0019219	regulation of nucleobase-containing compound metabolic process	Biological process	2.23173	0.00586499	up			GO:1901292	nucleoside phosphate catabolic process	Biological process	1.33596	0.0461356	up
GO:0006355	regulation of transcription, DNA-templated	Biological process	2.22318	0.00598169	up			GO:0031018	endocrine pancreas development	Biological process	1.33387	0.0463583	up
GO:0035270	endocrine system development	Biological process	2.22122	0.00600876	up			GO:1901990	regulation of mitotic cell cycle phase transition	Biological process	1.33194	0.0465649	up
GO:0016101	diterpenoid metabolic process	Biological process	2.22062	0.00601705	up			GO:0007050	cell cycle arrest	Biological process	1.3308	0.0466874	up
GO:0048821	erythrocyte development	Biological process	2.22008	0.00602446	up			GO:0060538	skeletal muscle organ development	Biological process	1.32834	0.0469524	up
GO:1990778	protein localization to cell periphery	Biological process	2.21728	0.0060635	up			GO:0006637	acyl-CoA metabolic process	Biological process	1.32804	0.0469847	up
GO:0032990	cell part morphogenesis	Biological process	2.21672	0.00607132	up			GO:0035383	thioester metabolic process	Biological process	1.32804	0.0469847	up
GO:1902895	positive regulation of pri-miRNA transcription by RNA polymerase II	Biological process	2.21665	0.00607232	up			GO:0042866	pyruvate biosynthetic process	Biological process	1.32804	0.0469847	up
GO:0009967	positive regulation of signal transduction	Biological process	2.20231	0.00627614	up			GO:0019637	organophosphate metabolic process	Biological process	1.32785	0.0470059	up
GO:0050867	positive regulation of cell activation	Biological process	2.19554	0.00637474	up			GO:0044255	cellular lipid metabolic process	Biological process	1.3266	0.0471413	up
GO:0006024	glycosaminoglycan biosynthetic process	Biological process	2.1896	0.00646247	up			GO:0043491	protein kinase B signaling	Biological process	1.3186	0.0480172	up
GO:0009583	detection of light stimulus	Biological process	2.18272	0.00656568	up			GO:0090407	organophosphate biosynthetic process	Biological process	1.31826	0.0480554	up
GO:0007044	cell-substrate junction assembly	Biological process	2.17327	0.00671011	up			GO:0032526	response to retinoic acid	Biological process	1.31774	0.0481129	up
GO:0010771	negative regulation of cell morphogenesis involved in differentiation	Biological process	2.17327	0.00671011	up			GO:0000381	regulation of alternative mRNA splicing, via spliceosome	Biological process	1.31631	0.0482717	up
GO:0048589	developmental growth	Biological process	2.17296	0.00671486	up			GO:0032011	ARF protein signal transduction	Biological process	1.31631	0.0482717	up
GO:0098930	axonal transport	Biological process	2.1718	0.00673291	up			GO:0032012	regulation of ARF protein signal transduction	Biological process	1.31631	0.0482717	up
GO:0019883	antigen processing and presentation of endogenous antigen	Biological process	2.1574	0.00695978	up			GO:0043551	regulation of phosphatidylinositol 3-kinase activity	Biological process	1.31631	0.0482717	up
GO:0045619	regulation of lymphocyte differentiation	Biological process	2.15663	0.00697223	up			GO:0048701	embryonic cranial skeleton morphogenesis	Biological process	1.31631	0.0482717	up
GO:0099531	presynaptic process involved in chemical synaptic transmission	Biological process	2.15663	0.00697223	up			GO:2000772	regulation of cellular senescence	Biological process	1.31631	0.0482717	up
GO:0034199	activation of protein kinase A activity	Biological process	2.15379	0.00701789	up			GO:0044770	cell cycle phase transition	Biological process	1.31446	0.0484778	up
GO:0030032	lamellipodium assembly	Biological process	2.14994	0.00708041	up			GO:0072524	pyridine-containing compound metabolic process	Biological process	1.31327	0.04861	up
GO:0006865	amino acid transport	Biological process	2.13774	0.00728211	up			GO:2000045	regulation of G1/S transition of mitotic cell cycle	Biological process	1.31327	0.04861	up
GO:0045664	regulation of neuron differentiation	Biological process	2.13705	0.0072937	up			GO:0009161	ribonucleoside monophosphate metabolic process	Biological process	1.31326	0.0486118	up
GO:0007264	small GTPase mediated signal transduction	Biological process	2.12639	0.00747505	up			GO:0000122	negative regulation of transcription by RNA polymerase II	Biological process	1.30847	0.0491506	up
GO:0009792	embryo development ending in birth or egg hatching	Biological process	2.12639	0.00747505	up			GO:0046031	ADP metabolic process	Biological process	1.30755	0.0492545	up
GO:1903037	regulation of leukocyte cell-cell adhesion	Biological process	2.1206	0.00757535	up			GO:0050803	regulation of synapse structure or activity	Biological process	1.30583	0.0494509	up
GO:1904062	regulation of cation transmembrane transport	Biological process	2.1206	0.00757535	up			GO:0031226	intrinsic component of plasma membrane	Cellular component	3.28965	0.000513274	up
GO:0097186	amelogenesis	Biological process	2.11988	0.00758789	up			GO:0005887	integral component of plasma membrane	Cellular component	2.82438	0.00149839	up
GO:0006721	terpenoid metabolic process	Biological process	2.11235	0.00772064	up			GO:0120111	neuron projection cytoplasm	Cellular component	2.68352	0.00207244	up
GO:0002448	mast cell mediated immunity	Biological process	2.10889	0.00778237	up			GO:0044459	plasma membrane part	Cellular component	2.65826	0.00219656	up
GO:0007409	axonogenesis	Biological process	2.10045	0.00793509	up			GO:0031981	nuclear lumen	Cellular component	2.52215	0.00300504	up
GO:0018108	peptidyl-tyrosine phosphorylation	Biological process	2.09541	0.0080277	up			GO:0005654	nucleoplasm	Cellular component	2.14816	0.00710955	up
GO:0030203	glycosaminoglycan metabolic process	Biological process	2.0945	0.00804449	up			GO:0034705	potassium channel complex	Cellular component	2.10036	0.00793669	up
GO:0051648	vesicle localization	Biological process	2.08725	0.00818002	up			GO:0019898	extrinsic component of membrane	Cellular component	2.08351	0.00825075	up
GO:0012501	programmed cell death	Biological process	2.08649	0.00819423	up			GO:0014069	postsynaptic density	Cellular component	2.02327	0.00947819	up
GO:0022604	regulation of cell morphogenesis	Biological process	2.08573	0.00820863	up			GO:0044428	nuclear part	Cellular component	2.01356	0.00969248	up
GO:0043588	skin development	Biological process	2.07659	0.00838327	up			GO:0099572	postsynaptic specialization	Cellular component	2.00569	0.00986976	up
GO:0008285	negative regulation of cell proliferation	Biological process	2.05461	0.00881844	up			GO:0032279	asymmetric synapse	Cellular component	1.9797	0.0104786	up
GO:0043009	chordate embryonic development	Biological process	2.05427	0.00882529	up			GO:0098984	neuron to neuron synapse	Cellular component	1.95414	0.0111136	up
GO:0046580	negative regulation of Ras protein signal transduction	Biological process	2.04808	0.00895192	up			GO:1990234	transferase complex	Cellular component	1.93418	0.0116365	up
GO:0001932	regulation of protein phosphorylation	Biological process	2.04505	0.00901461	up			GO:0031974	membrane-enclosed lumen	Cellular component	1.90593	0.0124186	up
GO:0001501	skeletal system development	Biological process	2.04229	0.0090721	up			GO:0043233	organelle lumen	Cellular component	1.90593	0.0124186	up
GO:0001775	cell activation	Biological process	2.04225	0.00907304	up			GO:0070013	intracellular organelle lumen	Cellular component	1.90593	0.0124186	up
GO:0015804	neutral amino acid transport	Biological process	2.04183	0.00908168	up			GO:0043679	axon terminus	Cellular component	1.78084	0.0165638	up
GO:0043067	regulation of programmed cell death	Biological process	2.04104	0.00909832	up			GO:0097458	neuron part	Cellular component	1.73783	0.0182882	up
GO:0034109	homotypic cell-cell adhesion	Biological process	2.03895	0.0091422	up			GO:0033267	axon part	Cellular component	1.64878	0.0224501	up
GO:0043087	regulation of GTPase activity	Biological process	2.03856	0.00915042	up			GO:0045202	synapse	Cellular component	1.64608	0.0225903	up
GO:0009299	mRNA transcription	Biological process	2.02881	0.00935809	up			GO:0012505	endomembrane system	Cellular component	1.6382	0.0230036	up
GO:0060669	embryonic placenta morphogenesis	Biological process	2.02881	0.00935809	up			GO:0061695	transferase complex, transferring phosphorus-containing groups	Cellular component	1.63708	0.0230633	up
GO:0043434	response to peptide hormone	Biological process	2.02447	0.00945216	up			GO:0044306	neuron projection terminus	Cellular component	1.60757	0.0246851	up
GO:0006493	protein O-linked glycosylation	Biological process	2.02287	0.00948692	up			GO:0098794	postsynapse	Cellular component	1.56926	0.0269615	up
GO:0007167	enzyme linked receptor protein signaling pathway	Biological process	2.02094	0.00952932	up			GO:0030424	axon	Cellular component	1.56057	0.0275059	up
GO:0045576	mast cell activation	Biological process	2.01429	0.00967631	up			GO:1902554	serine/threonine protein kinase complex	Cellular component	1.52346	0.02996	up
GO:0051656	establishment of organelle localization	Biological process	2.01205	0.00972626	up			GO:0044444	cytoplasmic part	Cellular component	1.51401	0.0306188	up
GO:0032940	secretion by cell	Biological process	2.00988	0.00977515	up			GO:0098793	presynapse	Cellular component	1.50334	0.0313802	up
GO:0008298	intracellular mRNA localization	Biological process	2.00778	0.00982236	up			GO:0043005	neuron projection	Cellular component	1.48135	0.0330107	up
GO:0045086	positive regulation of interleukin-2 biosynthetic process	Biological process	2.00778	0.00982236	up			GO:0044456	synapse part	Cellular component	1.47714	0.0333316	up
GO:0060536	cartilage morphogenesis	Biological process	2.00778	0.00982236	up			GO:0016020	membrane	Cellular component	1.44484	0.0359053	up
GO:0060965	negative regulation of gene silencing by miRNA	Biological process	2.00778	0.00982236	up			GO:0008076	voltage-gated potassium channel complex	Cellular component	1.43634	0.0366154	up
GO:1904748	regulation of apoptotic process involved in development	Biological process	2.00778	0.00982236	up			GO:0001726	ruffle	Cellular component	1.38204	0.0414913	up
GO:2001053	regulation of mesenchymal cell apoptotic process	Biological process	2.00778	0.00982236	up			GO:0070820	tertiary granule	Cellular component	1.38204	0.0414913	up
GO:0002696	positive regulation of leukocyte activation	Biological process	2.00296	0.00993216	up			GO:0000307	cyclin-dependent protein kinase holoenzyme complex	Cellular component	1.37953	0.0417319	up
GO:0030858	positive regulation of epithelial cell differentiation	Biological process	1.99794	0.0100476	up			GO:1904115	axon cytoplasm	Cellular component	1.37953	0.0417319	up
GO:0035115	embryonic forelimb morphogenesis	Biological process	1.98413	0.0103721	up			GO:0030672	synaptic vesicle membrane	Cellular component	1.36782	0.0428727	up
GO:0072659	protein localization to plasma membrane	Biological process	1.9792	0.0104905	up			GO:0099501	exocytic vesicle membrane	Cellular component	1.36782	0.0428727	up
GO:0001959	regulation of cytokine-mediated signaling pathway	Biological process	1.97825	0.0105135	up			GO:1902911	protein kinase complex	Cellular component	1.3569	0.0439645	up
GO:0006022	aminoglycan metabolic process	Biological process	1.97825	0.0105135	up			GO:0045211	postsynaptic membrane	Cellular component	1.34829	0.0448449	up
GO:0010648	negative regulation of cell communication	Biological process	1.97463	0.0106016	up			GO:0044425	membrane part	Cellular component	1.32917	0.0468633	up
GO:0000902	cell morphogenesis	Biological process	1.96968	0.0107231	up			GO:0005509	calcium ion binding	Molecular function	6.14547	7.15371e-07	up
GO:0045892	negative regulation of transcription, DNA-templated	Biological process	1.96821	0.0107595	up			GO:0015459	potassium channel regulator activity	Molecular function	4.36385	4.32662e-05	up
GO:0045859	regulation of protein kinase activity	Biological process	1.96641	0.0108041	up			GO:0008266	poly(U) RNA binding	Molecular function	3.35797	0.000438562	up
GO:0001558	regulation of cell growth	Biological process	1.96628	0.0108073	up			GO:0016247	channel regulator activity	Molecular function	3.14231	0.00072059	up
GO:0007602	phototransduction	Biological process	1.9617	0.010922	up			GO:0008187	poly-pyrimidine tract binding	Molecular function	3.10621	0.000783042	up
GO:0009584	detection of visible light	Biological process	1.9617	0.010922	up			GO:0099106	ion channel regulator activity	Molecular function	3.00847	0.000980683	up
GO:1902105	regulation of leukocyte differentiation	Biological process	1.9593	0.0109824	up			GO:0046934	phosphatidylinositol-4,5-bisphosphate 3-kinase activity	Molecular function	2.67189	0.00212868	up
GO:0051640	organelle localization	Biological process	1.95349	0.0111303	up			GO:0052813	phosphatidylinositol bisphosphate kinase activity	Molecular function	2.6032	0.00249344	up
GO:0010817	regulation of hormone levels	Biological process	1.95087	0.0111977	up			GO:0035004	phosphatidylinositol 3-kinase activity	Molecular function	2.49578	0.00319313	up
GO:0045666	positive regulation of neuron differentiation	Biological process	1.94636	0.0113147	up			GO:0035613	RNA stem-loop binding	Molecular function	2.20767	0.00619914	up
GO:0000188	inactivation of MAPK activity	Biological process	1.94294	0.0114041	up			GO:0019899	enzyme binding	Molecular function	2.10619	0.0078308	up
GO:0045860	positive regulation of protein kinase activity	Biological process	1.94061	0.0114655	up			GO:0031683	G-protein beta/gamma-subunit complex binding	Molecular function	1.96141	0.0109292	up
GO:0042981	regulation of apoptotic process	Biological process	1.93878	0.0115138	up			GO:0098772	molecular function regulator	Molecular function	1.95169	0.0111766	up
GO:0034220	ion transmembrane transport	Biological process	1.93858	0.0115192	up			GO:0035091	phosphatidylinositol binding	Molecular function	1.92304	0.0119387	up
GO:0023057	negative regulation of signaling	Biological process	1.93668	0.0115695	up			GO:0008375	acetylglucosaminyltransferase activity	Molecular function	1.91324	0.0122112	up
GO:0051046	regulation of secretion	Biological process	1.93658	0.0115722	up			GO:0070717	poly-purine tract binding	Molecular function	1.84381	0.014328	up
GO:0002682	regulation of immune system process	Biological process	1.93162	0.0117052	up			GO:0005102	signaling receptor binding	Molecular function	1.81966	0.0151475	up
GO:0022407	regulation of cell-cell adhesion	Biological process	1.92907	0.0117742	up			GO:0035198	miRNA binding	Molecular function	1.80828	0.0155497	up
GO:0003002	regionalization	Biological process	1.92824	0.0117967	up			GO:0030371	translation repressor activity	Molecular function	1.77432	0.0168144	up
GO:0010721	negative regulation of cell development	Biological process	1.91525	0.0121549	up			GO:0005543	phospholipid binding	Molecular function	1.76574	0.0171497	up
GO:0051489	regulation of filopodium assembly	Biological process	1.91377	0.0121965	up			GO:0051020	GTPase binding	Molecular function	1.75511	0.0175746	up
GO:0010591	regulation of lamellipodium assembly	Biological process	1.91258	0.0122298	up			GO:0030234	enzyme regulator activity	Molecular function	1.71931	0.0190847	up
GO:0001701	in utero embryonic development	Biological process	1.91235	0.0122362	up			GO:0005267	potassium channel activity	Molecular function	1.70214	0.0198544	up
GO:0021537	telencephalon development	Biological process	1.90883	0.0123358	up			GO:0051721	protein phosphatase 2A binding	Molecular function	1.68069	0.0208596	up
GO:0050730	regulation of peptidyl-tyrosine phosphorylation	Biological process	1.90883	0.0123358	up			GO:0005251	delayed rectifier potassium channel activity	Molecular function	1.65191	0.0222892	up
GO:0061515	myeloid cell development	Biological process	1.90302	0.012502	up			GO:0043167	ion binding	Molecular function	1.64097	0.0228576	up
GO:0007159	leukocyte cell-cell adhesion	Biological process	1.88978	0.012889	up			GO:0005488	binding	Molecular function	1.60702	0.024716	up
GO:0007599	hemostasis	Biological process	1.88944	0.0128991	up			GO:0003727	single-stranded RNA binding	Molecular function	1.58263	0.0261438	up
GO:0034330	cell junction organization	Biological process	1.88658	0.0129843	up			GO:0008289	lipid binding	Molecular function	1.58224	0.0261676	up
GO:0051650	establishment of vesicle localization	Biological process	1.87764	0.0132543	up			GO:0001205	transcriptional activator activity, RNA polymerase II distal enhancer sequence-specific DNA binding	Molecular function	1.54677	0.0283944	up
GO:0051174	regulation of phosphorus metabolic process	Biological process	1.87643	0.0132914	up			GO:0061980	regulatory RNA binding	Molecular function	1.54677	0.0283944	up
GO:0031643	positive regulation of myelination	Biological process	1.87447	0.0133514	up			GO:1901981	phosphatidylinositol phosphate binding	Molecular function	1.51978	0.0302149	up
GO:0034497	protein localization to phagophore assembly site	Biological process	1.87447	0.0133514	up			GO:0015175	neutral amino acid transmembrane transporter activity	Molecular function	1.49936	0.0316694	up
GO:0061029	eyelid development in camera-type eye	Biological process	1.87447	0.0133514	up			GO:0008200	ion channel inhibitor activity	Molecular function	1.47677	0.0333602	up
GO:0071872	cellular response to epinephrine stimulus	Biological process	1.87447	0.0133514	up			GO:0005109	frizzled binding	Molecular function	1.45487	0.0350855	up
GO:0072044	collecting duct development	Biological process	1.87447	0.0133514	up			GO:0016248	channel inhibitor activity	Molecular function	1.45487	0.0350855	up
GO:0097152	mesenchymal cell apoptotic process	Biological process	1.87447	0.0133514	up			GO:0031267	small GTPase binding	Molecular function	1.40735	0.0391427	up
GO:0018193	peptidyl-amino acid modification	Biological process	1.87158	0.0134407	up			GO:0005249	voltage-gated potassium channel activity	Molecular function	1.40464	0.0393873	up
GO:0007584	response to nutrient	Biological process	1.87137	0.0134471	up			GO:0015079	potassium ion transmembrane transporter activity	Molecular function	1.35597	0.0440584	up
GO:0050817	coagulation	Biological process	1.87077	0.0134659	up			GO:1902936	phosphatidylinositol bisphosphate binding	Molecular function	1.34872	0.0448005	up
GO:0008284	positive regulation of cell proliferation	Biological process	1.87048	0.0134746	up			GO:0042887	amide transmembrane transporter activity	Molecular function	1.33603	0.0461283	up
GO:0045321	leukocyte activation	Biological process	1.86832	0.0135418	up
GO:0030030	cell projection organization	Biological process	1.86339	0.0136967	up
GO:0006359	regulation of transcription by RNA polymerase III	Biological process	1.86181	0.0137465	up
GO:0007628	adult walking behavior	Biological process	1.86181	0.0137465	up
GO:0031954	positive regulation of protein autophosphorylation	Biological process	1.86181	0.0137465	up
GO:0043242	negative regulation of protein complex disassembly	Biological process	1.85736	0.0138881	up
GO:0051155	positive regulation of striated muscle cell differentiation	Biological process	1.85736	0.0138881	up
GO:1901264	carbohydrate derivative transport	Biological process	1.85736	0.0138881	up
GO:0051251	positive regulation of lymphocyte activation	Biological process	1.85322	0.0140209	up
GO:0070727	cellular macromolecule localization	Biological process	1.85281	0.0140342	up
GO:0051591	response to cAMP	Biological process	1.85209	0.0140577	up
GO:0051171	regulation of nitrogen compound metabolic process	Biological process	1.84858	0.0141716	up
GO:0003091	renal water homeostasis	Biological process	1.84419	0.0143156	up
GO:0007611	learning or memory	Biological process	1.84058	0.0144352	up
GO:0043270	positive regulation of ion transport	Biological process	1.84058	0.0144352	up
GO:0071310	cellular response to organic substance	Biological process	1.84019	0.0144481	up
GO:0071305	cellular response to vitamin D	Biological process	1.83705	0.0145531	up
GO:0098655	cation transmembrane transport	Biological process	1.82743	0.0148788	up
GO:0014074	response to purine-containing compound	Biological process	1.82467	0.0149736	up
GO:0009311	oligosaccharide metabolic process	Biological process	1.82083	0.0151066	up
GO:0031323	regulation of cellular metabolic process	Biological process	1.82074	0.0151098	up
GO:0051247	positive regulation of protein metabolic process	Biological process	1.81914	0.0151655	up
GO:0098660	inorganic ion transmembrane transport	Biological process	1.81813	0.0152009	up
GO:0009968	negative regulation of signal transduction	Biological process	1.81374	0.0153555	up
GO:0010803	regulation of tumor necrosis factor-mediated signaling pathway	Biological process	1.8127	0.0153923	up
GO:0042325	regulation of phosphorylation	Biological process	1.81102	0.0154517	up
GO:0033043	regulation of organelle organization	Biological process	1.8024	0.0157615	up
GO:0071495	cellular response to endogenous stimulus	Biological process	1.80217	0.0157701	up
GO:0019220	regulation of phosphate metabolic process	Biological process	1.79884	0.0158914	up
GO:0048709	oligodendrocyte differentiation	Biological process	1.79592	0.0159985	up
GO:1901019	regulation of calcium ion transmembrane transporter activity	Biological process	1.79592	0.0159985	up
GO:0060041	retina development in camera-type eye	Biological process	1.79304	0.0161049	up
GO:0006720	isoprenoid metabolic process	Biological process	1.79291	0.01611	up
GO:0000122	negative regulation of transcription by RNA polymerase II	Biological process	1.78783	0.0162992	up
GO:0048608	reproductive structure development	Biological process	1.78556	0.0163848	up
GO:0048732	gland development	Biological process	1.78556	0.0163848	up
GO:0010644	cell communication by electrical coupling	Biological process	1.78503	0.0164046	up
GO:0090659	walking behavior	Biological process	1.78503	0.0164046	up
GO:0048667	cell morphogenesis involved in neuron differentiation	Biological process	1.78396	0.0164454	up
GO:0048771	tissue remodeling	Biological process	1.78067	0.0165702	up
GO:0007596	blood coagulation	Biological process	1.77807	0.0166698	up
GO:0070588	calcium ion transmembrane transport	Biological process	1.77692	0.0167138	up
GO:0022603	regulation of anatomical structure morphogenesis	Biological process	1.77591	0.016753	up
GO:0008104	protein localization	Biological process	1.77546	0.0167702	up
GO:2001257	regulation of cation channel activity	Biological process	1.77316	0.0168593	up
GO:0001960	negative regulation of cytokine-mediated signaling pathway	Biological process	1.77244	0.0168875	up
GO:0060759	regulation of response to cytokine stimulus	Biological process	1.76397	0.0172197	up
GO:0060047	heart contraction	Biological process	1.76187	0.0173031	up
GO:0009888	tissue development	Biological process	1.76016	0.0173715	up
GO:0001523	retinoid metabolic process	Biological process	1.75824	0.0174487	up
GO:0035461	vitamin transmembrane transport	Biological process	1.75466	0.0175932	up
GO:0006915	apoptotic process	Biological process	1.74968	0.0177958	up
GO:0010804	negative regulation of tumor necrosis factor-mediated signaling pathway	Biological process	1.7462	0.0179391	up
GO:0043153	entrainment of circadian clock by photoperiod	Biological process	1.7462	0.0179391	up
GO:0050868	negative regulation of T cell activation	Biological process	1.74412	0.0180253	up
GO:0034329	cell junction assembly	Biological process	1.74365	0.0180445	up
GO:0050890	cognition	Biological process	1.74176	0.0181232	up
GO:0030073	insulin secretion	Biological process	1.73853	0.0182587	up
GO:0061458	reproductive system development	Biological process	1.73767	0.0182949	up
GO:0051153	regulation of striated muscle cell differentiation	Biological process	1.73585	0.0183719	up
GO:0032774	RNA biosynthetic process	Biological process	1.73358	0.0184678	up
GO:0050870	positive regulation of T cell activation	Biological process	1.72903	0.0186627	up
GO:0120036	plasma membrane bounded cell projection organization	Biological process	1.72499	0.0188371	up
GO:0050854	regulation of antigen receptor-mediated signaling pathway	Biological process	1.72242	0.0189487	up
GO:0051058	negative regulation of small GTPase mediated signal transduction	Biological process	1.72242	0.0189487	up
GO:0051961	negative regulation of nervous system development	Biological process	1.72184	0.0189739	up
GO:0006919	activation of cysteine-type endopeptidase activity involved in apoptotic process	Biological process	1.72133	0.0189962	up
GO:0014070	response to organic cyclic compound	Biological process	1.71607	0.0192279	up
GO:0090276	regulation of peptide hormone secretion	Biological process	1.71498	0.0192759	up
GO:0035116	embryonic hindlimb morphogenesis	Biological process	1.71227	0.0193967	up
GO:0071295	cellular response to vitamin	Biological process	1.71227	0.0193967	up
GO:0030855	epithelial cell differentiation	Biological process	1.7037	0.0197832	up
GO:0070838	divalent metal ion transport	Biological process	1.70239	0.0198429	up
GO:0003015	heart process	Biological process	1.70211	0.019856	up
GO:0046683	response to organophosphorus	Biological process	1.702	0.0198608	up
GO:0032270	positive regulation of cellular protein metabolic process	Biological process	1.69125	0.0203585	up
GO:0098662	inorganic cation transmembrane transport	Biological process	1.68505	0.0206514	up
GO:0001974	blood vessel remodeling	Biological process	1.6847	0.0206679	up
GO:0045744	negative regulation of G-protein coupled receptor protein signaling pathway	Biological process	1.6847	0.0206679	up
GO:0051972	regulation of telomerase activity	Biological process	1.6847	0.0206679	up
GO:0071774	response to fibroblast growth factor	Biological process	1.68434	0.0206852	up
GO:0051338	regulation of transferase activity	Biological process	1.68366	0.0207174	up
GO:0008219	cell death	Biological process	1.68306	0.0207463	up
GO:0097659	nucleic acid-templated transcription	Biological process	1.68073	0.0208578	up
GO:0030534	adult behavior	Biological process	1.6775	0.0210136	up
GO:0050891	multicellular organismal water homeostasis	Biological process	1.67577	0.0210974	up
GO:0008088	axo-dendritic transport	Biological process	1.67395	0.0211862	up
GO:0070527	platelet aggregation	Biological process	1.67395	0.0211862	up
GO:0007173	epidermal growth factor receptor signaling pathway	Biological process	1.67266	0.0212491	up
GO:0051250	negative regulation of lymphocyte activation	Biological process	1.67266	0.0212491	up
GO:0031668	cellular response to extracellular stimulus	Biological process	1.67225	0.0212692	up
GO:0080090	regulation of primary metabolic process	Biological process	1.67046	0.0213572	up
GO:0048519	negative regulation of biological process	Biological process	1.66861	0.0214484	up
GO:0021543	pallium development	Biological process	1.66678	0.0215389	up
GO:0048534	hematopoietic or lymphoid organ development	Biological process	1.66632	0.0215614	up
GO:0021516	dorsal spinal cord development	Biological process	1.66141	0.0218067	up
GO:0050858	negative regulation of antigen receptor-mediated signaling pathway	Biological process	1.66141	0.0218067	up
GO:0051253	negative regulation of RNA metabolic process	Biological process	1.65138	0.0223163	up
GO:0045216	cell-cell junction organization	Biological process	1.65118	0.0223266	up
GO:0045618	positive regulation of keratinocyte differentiation	Biological process	1.64618	0.0225848	up
GO:0050711	negative regulation of interleukin-1 secretion	Biological process	1.64618	0.0225848	up
GO:0060149	negative regulation of posttranscriptional gene silencing	Biological process	1.64618	0.0225848	up
GO:0060967	negative regulation of gene silencing by RNA	Biological process	1.64618	0.0225848	up
GO:1902187	negative regulation of viral release from host cell	Biological process	1.64618	0.0225848	up
GO:1903798	regulation of production of miRNAs involved in gene silencing by miRNA	Biological process	1.64618	0.0225848	up
GO:0003016	respiratory system process	Biological process	1.64321	0.0227398	up
GO:0048384	retinoic acid receptor signaling pathway	Biological process	1.64321	0.0227398	up
GO:0008544	epidermis development	Biological process	1.64265	0.0227695	up
GO:0072511	divalent inorganic cation transport	Biological process	1.64265	0.0227695	up
GO:0003014	renal system process	Biological process	1.63939	0.0229407	up
GO:0042177	negative regulation of protein catabolic process	Biological process	1.63939	0.0229407	up
GO:0032989	cellular component morphogenesis	Biological process	1.63842	0.0229923	up
GO:0006351	transcription, DNA-templated	Biological process	1.63409	0.0232227	up
GO:0034260	negative regulation of GTPase activity	Biological process	1.63244	0.0233111	up
GO:0002695	negative regulation of leukocyte activation	Biological process	1.63098	0.0233897	up
GO:0010562	positive regulation of phosphorus metabolic process	Biological process	1.63086	0.0233958	up
GO:0045937	positive regulation of phosphate metabolic process	Biological process	1.63086	0.0233958	up
GO:1903507	negative regulation of nucleic acid-templated transcription	Biological process	1.62258	0.0238462	up
GO:1903169	regulation of calcium ion transmembrane transport	Biological process	1.6223	0.0238616	up
GO:0033036	macromolecule localization	Biological process	1.62043	0.0239646	up
GO:0031401	positive regulation of protein modification process	Biological process	1.61835	0.0240799	up
GO:0033500	carbohydrate homeostasis	Biological process	1.61755	0.0241242	up
GO:0042593	glucose homeostasis	Biological process	1.61755	0.0241242	up
GO:0048469	cell maturation	Biological process	1.61574	0.024225	up
GO:0030100	regulation of endocytosis	Biological process	1.613	0.0243779	up
GO:0043547	positive regulation of GTPase activity	Biological process	1.61189	0.0244403	up
GO:0071705	nitrogen compound transport	Biological process	1.61142	0.0244671	up
GO:0090596	sensory organ morphogenesis	Biological process	1.60749	0.0246896	up
GO:0021766	hippocampus development	Biological process	1.60626	0.0247594	up
GO:0032943	mononuclear cell proliferation	Biological process	1.60623	0.0247611	up
GO:1902679	negative regulation of RNA biosynthetic process	Biological process	1.60472	0.0248472	up
GO:0048736	appendage development	Biological process	1.60338	0.0249243	up
GO:0060173	limb development	Biological process	1.60338	0.0249243	up
GO:0061028	establishment of endothelial barrier	Biological process	1.59847	0.0252072	up
GO:0071377	cellular response to glucagon stimulus	Biological process	1.59847	0.0252072	up
GO:0060348	bone development	Biological process	1.59343	0.0255019	up
GO:0016310	phosphorylation	Biological process	1.59335	0.0255064	up
GO:0035556	intracellular signal transduction	Biological process	1.59311	0.0255204	up
GO:0043549	regulation of kinase activity	Biological process	1.59259	0.0255509	up
GO:0051924	regulation of calcium ion transport	Biological process	1.59205	0.0255829	up
GO:1903530	regulation of secretion by cell	Biological process	1.59125	0.0256303	up
GO:0015807	L-amino acid transport	Biological process	1.59058	0.0256696	up
GO:0007026	negative regulation of microtubule depolymerization	Biological process	1.58208	0.0261773	up
GO:0032925	regulation of activin receptor signaling pathway	Biological process	1.58208	0.0261773	up
GO:0043576	regulation of respiratory gaseous exchange	Biological process	1.58208	0.0261773	up
GO:0045956	positive regulation of calcium ion-dependent exocytosis	Biological process	1.58208	0.0261773	up
GO:0048260	positive regulation of receptor-mediated endocytosis	Biological process	1.58198	0.0261829	up
GO:0060711	labyrinthine layer development	Biological process	1.58198	0.0261829	up
GO:0001836	release of cytochrome c from mitochondria	Biological process	1.58137	0.0262196	up
GO:0060761	negative regulation of response to cytokine stimulus	Biological process	1.58137	0.0262196	up
GO:1903391	regulation of adherens junction organization	Biological process	1.58137	0.0262196	up
GO:0002376	immune system process	Biological process	1.579	0.0263635	up
GO:0007272	ensheathment of neurons	Biological process	1.57792	0.0264289	up
GO:0008366	axon ensheathment	Biological process	1.57792	0.0264289	up
GO:0010941	regulation of cell death	Biological process	1.57776	0.0264384	up
GO:0003401	axis elongation	Biological process	1.57759	0.0264492	up
GO:0010765	positive regulation of sodium ion transport	Biological process	1.57759	0.0264492	up
GO:0014013	regulation of gliogenesis	Biological process	1.57753	0.0264526	up
GO:0043010	camera-type eye development	Biological process	1.57081	0.0268654	up
GO:0021536	diencephalon development	Biological process	1.56792	0.0270447	up
GO:0000904	cell morphogenesis involved in differentiation	Biological process	1.5657	0.0271829	up
GO:0035637	multicellular organismal signaling	Biological process	1.56313	0.0273442	up
GO:1901652	response to peptide	Biological process	1.55726	0.0277163	up
GO:0042058	regulation of epidermal growth factor receptor signaling pathway	Biological process	1.55458	0.0278879	up
GO:0008015	blood circulation	Biological process	1.55419	0.0279131	up
GO:0009611	response to wounding	Biological process	1.55134	0.0280968	up
GO:0008016	regulation of heart contraction	Biological process	1.54911	0.0282415	up
GO:0032868	response to insulin	Biological process	1.54835	0.0282908	up
GO:0045787	positive regulation of cell cycle	Biological process	1.54821	0.0283001	up
GO:0034613	cellular protein localization	Biological process	1.54773	0.0283317	up
GO:0035855	megakaryocyte development	Biological process	1.54739	0.0283538	up
GO:0044065	regulation of respiratory system process	Biological process	1.54739	0.0283538	up
GO:0071871	response to epinephrine	Biological process	1.54739	0.0283538	up
GO:1900151	regulation of nuclear-transcribed mRNA catabolic process, deadenylation-dependent decay	Biological process	1.54739	0.0283538	up
GO:1900153	positive regulation of nuclear-transcribed mRNA catabolic process, deadenylation-dependent decay	Biological process	1.54739	0.0283538	up
GO:0001934	positive regulation of protein phosphorylation	Biological process	1.54458	0.0285377	up
GO:0007019	microtubule depolymerization	Biological process	1.54321	0.0286278	up
GO:0044267	cellular protein metabolic process	Biological process	1.53773	0.0289916	up
GO:0046847	filopodium assembly	Biological process	1.53716	0.0290293	up
GO:0048588	developmental cell growth	Biological process	1.53622	0.0290923	up
GO:0001933	negative regulation of protein phosphorylation	Biological process	1.53439	0.0292151	up
GO:0061097	regulation of protein tyrosine kinase activity	Biological process	1.5305	0.0294781	up
GO:2000177	regulation of neural precursor cell proliferation	Biological process	1.5305	0.0294781	up
GO:0007162	negative regulation of cell adhesion	Biological process	1.52905	0.0295769	up
GO:0016043	cellular component organization	Biological process	1.52629	0.0297653	up
GO:0048013	ephrin receptor signaling pathway	Biological process	1.51985	0.03021	up
GO:0032869	cellular response to insulin stimulus	Biological process	1.51917	0.0302572	up
GO:0050670	regulation of lymphocyte proliferation	Biological process	1.51917	0.0302572	up
GO:0009954	proximal/distal pattern formation	Biological process	1.51515	0.0305386	up
GO:0035587	purinergic receptor signaling pathway	Biological process	1.51515	0.0305386	up
GO:0071526	semaphorin-plexin signaling pathway	Biological process	1.51515	0.0305386	up
GO:2000273	positive regulation of signaling receptor activity	Biological process	1.51515	0.0305386	up
GO:0070663	regulation of leukocyte proliferation	Biological process	1.51503	0.030547	up
GO:0070661	leukocyte proliferation	Biological process	1.51247	0.0307275	up
GO:0032412	regulation of ion transmembrane transporter activity	Biological process	1.51049	0.0308678	up
GO:0030104	water homeostasis	Biological process	1.50988	0.0309112	up
GO:0002092	positive regulation of receptor internalization	Biological process	1.50767	0.0310692	up
GO:0003071	renal system process involved in regulation of systemic arterial blood pressure	Biological process	1.50767	0.0310692	up
GO:0031646	positive regulation of neurological system process	Biological process	1.50767	0.0310692	up
GO:0060632	regulation of microtubule-based movement	Biological process	1.50767	0.0310692	up
GO:0060969	negative regulation of gene silencing	Biological process	1.50767	0.0310692	up
GO:0071800	podosome assembly	Biological process	1.50767	0.0310692	up
GO:0095500	acetylcholine receptor signaling pathway	Biological process	1.50767	0.0310692	up
GO:1903831	signal transduction involved in cellular response to ammonium ion	Biological process	1.50767	0.0310692	up
GO:1905144	response to acetylcholine	Biological process	1.50767	0.0310692	up
GO:1905145	cellular response to acetylcholine	Biological process	1.50767	0.0310692	up
GO:0061351	neural precursor cell proliferation	Biological process	1.50608	0.0311832	up
GO:0003013	circulatory system process	Biological process	1.50167	0.0315016	up
GO:0032944	regulation of mononuclear cell proliferation	Biological process	1.49759	0.0317989	up
GO:1903522	regulation of blood circulation	Biological process	1.49691	0.0318486	up
GO:0070059	intrinsic apoptotic signaling pathway in response to endoplasmic reticulum stress	Biological process	1.49426	0.0320432	up
GO:1903039	positive regulation of leukocyte cell-cell adhesion	Biological process	1.49183	0.032223	up
GO:0022409	positive regulation of cell-cell adhesion	Biological process	1.49103	0.0322829	up
GO:0042327	positive regulation of phosphorylation	Biological process	1.4908	0.0322998	up
GO:0035136	forelimb morphogenesis	Biological process	1.49014	0.0323488	up
GO:0060429	epithelium development	Biological process	1.48764	0.0325359	up
GO:0042326	negative regulation of phosphorylation	Biological process	1.48658	0.0326151	up
GO:0001942	hair follicle development	Biological process	1.48588	0.0326682	up
GO:1903706	regulation of hemopoiesis	Biological process	1.48468	0.0327585	up
GO:0033674	positive regulation of kinase activity	Biological process	1.48359	0.0328406	up
GO:0002262	myeloid cell homeostasis	Biological process	1.47983	0.0331262	up
GO:0019722	calcium-mediated signaling	Biological process	1.47076	0.033825	up
GO:0009581	detection of external stimulus	Biological process	1.46971	0.0339069	up
GO:0030099	myeloid cell differentiation	Biological process	1.46261	0.0344658	up
GO:0002475	antigen processing and presentation via MHC class Ib	Biological process	1.4615	0.0345544	up
GO:0007084	mitotic nuclear envelope reassembly	Biological process	1.4615	0.0345544	up
GO:0009629	response to gravity	Biological process	1.4615	0.0345544	up
GO:0010960	magnesium ion homeostasis	Biological process	1.4615	0.0345544	up
GO:0035878	nail development	Biological process	1.4615	0.0345544	up
GO:0045792	negative regulation of cell size	Biological process	1.4615	0.0345544	up
GO:0060371	regulation of atrial cardiac muscle cell membrane depolarization	Biological process	1.4615	0.0345544	up
GO:1903011	negative regulation of bone development	Biological process	1.4615	0.0345544	up
GO:2000480	negative regulation of cAMP-dependent protein kinase activity	Biological process	1.4615	0.0345544	up
GO:2001054	negative regulation of mesenchymal cell apoptotic process	Biological process	1.4615	0.0345544	up
GO:0030097	hemopoiesis	Biological process	1.45991	0.0346805	up
GO:0008344	adult locomotory behavior	Biological process	1.45833	0.0348075	up
GO:0050848	regulation of calcium-mediated signaling	Biological process	1.45833	0.0348075	up
GO:1901879	regulation of protein depolymerization	Biological process	1.45833	0.0348075	up
GO:0017085	response to insecticide	Biological process	1.45694	0.0349187	up
GO:0048490	anterograde synaptic vesicle transport	Biological process	1.45694	0.0349187	up
GO:0051446	positive regulation of meiotic cell cycle	Biological process	1.45694	0.0349187	up
GO:0070920	regulation of production of small RNA involved in gene silencing by RNA	Biological process	1.45694	0.0349187	up
GO:0090201	negative regulation of release of cytochrome c from mitochondria	Biological process	1.45694	0.0349187	up
GO:0099514	synaptic vesicle cytoskeletal transport	Biological process	1.45694	0.0349187	up
GO:0099517	synaptic vesicle transport along microtubule	Biological process	1.45694	0.0349187	up
GO:0018345	protein palmitoylation	Biological process	1.45568	0.03502	up
GO:0031111	negative regulation of microtubule polymerization or depolymerization	Biological process	1.45568	0.03502	up
GO:0032633	interleukin-4 production	Biological process	1.45568	0.03502	up
GO:0044091	membrane biogenesis	Biological process	1.45568	0.03502	up
GO:0060674	placenta blood vessel development	Biological process	1.45568	0.03502	up
GO:1902742	apoptotic process involved in development	Biological process	1.45568	0.03502	up
GO:0050768	negative regulation of neurogenesis	Biological process	1.45379	0.0351732	up
GO:0010812	negative regulation of cell-substrate adhesion	Biological process	1.45263	0.0352673	up
GO:0015800	acidic amino acid transport	Biological process	1.45263	0.0352673	up
GO:0071277	cellular response to calcium ion	Biological process	1.45263	0.0352673	up
GO:1901184	regulation of ERBB signaling pathway	Biological process	1.45207	0.0353129	up
GO:0051347	positive regulation of transferase activity	Biological process	1.4471	0.0357194	up
GO:1903827	regulation of cellular protein localization	Biological process	1.44552	0.0358492	up
GO:0019725	cellular homeostasis	Biological process	1.44324	0.0360383	up
GO:0021515	cell differentiation in spinal cord	Biological process	1.44067	0.0362518	up
GO:0014047	glutamate secretion	Biological process	1.43915	0.0363793	up
GO:0090382	phagosome maturation	Biological process	1.43915	0.0363793	up
GO:0009648	photoperiodism	Biological process	1.43774	0.036497	up
GO:0015012	heparan sulfate proteoglycan biosynthetic process	Biological process	1.43774	0.036497	up
GO:0030878	thyroid gland development	Biological process	1.43774	0.036497	up
GO:0046651	lymphocyte proliferation	Biological process	1.43546	0.0366897	up
GO:0009416	response to light stimulus	Biological process	1.43178	0.0370019	up
GO:0007613	memory	Biological process	1.42614	0.0374853	up
GO:0033209	tumor necrosis factor-mediated signaling pathway	Biological process	1.42503	0.0375811	up
GO:0061387	regulation of extent of cell growth	Biological process	1.42141	0.0378961	up
GO:0045934	negative regulation of nucleobase-containing compound metabolic process	Biological process	1.42088	0.0379423	up
GO:0022404	molting cycle process	Biological process	1.42013	0.0380072	up
GO:0022405	hair cycle process	Biological process	1.42013	0.0380072	up
GO:0033273	response to vitamin	Biological process	1.42013	0.0380072	up
GO:0098773	skin epidermis development	Biological process	1.42013	0.0380072	up
GO:0019221	cytokine-mediated signaling pathway	Biological process	1.41885	0.0381195	up
GO:1990138	neuron projection extension	Biological process	1.41743	0.0382449	up
GO:0033157	regulation of intracellular protein transport	Biological process	1.41731	0.0382548	up
GO:0045807	positive regulation of endocytosis	Biological process	1.4166	0.0383175	up
GO:0060255	regulation of macromolecule metabolic process	Biological process	1.41564	0.0384023	up
GO:0010830	regulation of myotube differentiation	Biological process	1.41221	0.0387072	up
GO:0031670	cellular response to nutrient	Biological process	1.41221	0.0387072	up
GO:0061138	morphogenesis of a branching epithelium	Biological process	1.39814	0.0399814	up
GO:0072089	stem cell proliferation	Biological process	1.39754	0.0400364	up
GO:0036465	synaptic vesicle recycling	Biological process	1.39668	0.0401167	up
GO:0022898	regulation of transmembrane transporter activity	Biological process	1.3947	0.0402998	up
GO:2000278	regulation of DNA biosynthetic process	Biological process	1.39136	0.0406106	up
GO:0009582	detection of abiotic stimulus	Biological process	1.39071	0.0406718	up
GO:0050671	positive regulation of lymphocyte proliferation	Biological process	1.39071	0.0406718	up
GO:0021762	substantia nigra development	Biological process	1.39012	0.0407272	up
GO:0021983	pituitary gland development	Biological process	1.39012	0.0407272	up
GO:0051445	regulation of meiotic cell cycle	Biological process	1.39012	0.0407272	up
GO:0097581	lamellipodium organization	Biological process	1.38954	0.040781	up
GO:1901888	regulation of cell junction assembly	Biological process	1.38954	0.040781	up
GO:0072359	circulatory system development	Biological process	1.38339	0.0413632	up
GO:0034765	regulation of ion transmembrane transport	Biological process	1.38064	0.0416252	up
GO:0035264	multicellular organism growth	Biological process	1.37888	0.0417944	up
GO:0055085	transmembrane transport	Biological process	1.37442	0.0422256	up
GO:0019318	hexose metabolic process	Biological process	1.37441	0.0422271	up
GO:0010224	response to UV-B	Biological process	1.37377	0.0422892	up
GO:0010592	positive regulation of lamellipodium assembly	Biological process	1.37377	0.0422892	up
GO:0045076	regulation of interleukin-2 biosynthetic process	Biological process	1.37377	0.0422892	up
GO:0045655	regulation of monocyte differentiation	Biological process	1.37377	0.0422892	up
GO:0050860	negative regulation of T cell receptor signaling pathway	Biological process	1.37377	0.0422892	up
GO:0031669	cellular response to nutrient levels	Biological process	1.37347	0.0423183	up
GO:0050771	negative regulation of axonogenesis	Biological process	1.37296	0.0423681	up
GO:0072091	regulation of stem cell proliferation	Biological process	1.37296	0.0423681	up
GO:1901880	negative regulation of protein depolymerization	Biological process	1.37296	0.0423681	up
GO:0032692	negative regulation of interleukin-1 production	Biological process	1.3719	0.0424715	up
GO:0060314	regulation of ryanodine-sensitive calcium-release channel activity	Biological process	1.3719	0.0424715	up
GO:0019222	regulation of metabolic process	Biological process	1.37081	0.0425787	up
GO:0038127	ERBB signaling pathway	Biological process	1.36995	0.0426629	up
GO:1903038	negative regulation of leukocyte cell-cell adhesion	Biological process	1.36949	0.0427085	up
GO:0002768	immune response-regulating cell surface receptor signaling pathway	Biological process	1.36751	0.0429028	up
GO:0034762	regulation of transmembrane transport	Biological process	1.36678	0.042975	up
GO:0051348	negative regulation of transferase activity	Biological process	1.36607	0.043046	up
GO:0033993	response to lipid	Biological process	1.36555	0.0430974	up
GO:0032946	positive regulation of mononuclear cell proliferation	Biological process	1.36524	0.0431281	up
GO:0006885	regulation of pH	Biological process	1.36192	0.0434593	up
GO:0021761	limbic system development	Biological process	1.36192	0.0434593	up
GO:0051149	positive regulation of muscle cell differentiation	Biological process	1.36192	0.0434593	up
GO:0072332	intrinsic apoptotic signaling pathway by p53 class mediator	Biological process	1.35636	0.044019	up
GO:0007565	female pregnancy	Biological process	1.35575	0.0440813	up
GO:0048146	positive regulation of fibroblast proliferation	Biological process	1.35412	0.0442463	up
GO:0048646	anatomical structure formation involved in morphogenesis	Biological process	1.35384	0.0442751	up
GO:0042060	wound healing	Biological process	1.35207	0.0444557	up
GO:1901699	cellular response to nitrogen compound	Biological process	1.35037	0.0446305	up
GO:0051129	negative regulation of cellular component organization	Biological process	1.34946	0.0447238	up
GO:0003093	regulation of glomerular filtration	Biological process	1.34773	0.0449024	up
GO:0006600	creatine metabolic process	Biological process	1.34773	0.0449024	up
GO:0019042	viral latency	Biological process	1.34773	0.0449024	up
GO:0021521	ventral spinal cord interneuron specification	Biological process	1.34773	0.0449024	up
GO:0046689	response to mercury ion	Biological process	1.34773	0.0449024	up
GO:0060573	cell fate specification involved in pattern specification	Biological process	1.34773	0.0449024	up
GO:0061081	positive regulation of myeloid leukocyte cytokine production involved in immune response	Biological process	1.34773	0.0449024	up
GO:0071803	positive regulation of podosome assembly	Biological process	1.34773	0.0449024	up
GO:0097104	postsynaptic membrane assembly	Biological process	1.34773	0.0449024	up
GO:0002707	negative regulation of lymphocyte mediated immunity	Biological process	1.34488	0.0451978	up
GO:0019076	viral release from host cell	Biological process	1.34488	0.0451978	up
GO:0031641	regulation of myelination	Biological process	1.34488	0.0451978	up
GO:0035890	exit from host	Biological process	1.34488	0.0451978	up
GO:0035891	exit from host cell	Biological process	1.34488	0.0451978	up
GO:0052126	movement in host environment	Biological process	1.34488	0.0451978	up
GO:0052192	movement in environment of other organism involved in symbiotic interaction	Biological process	1.34488	0.0451978	up
GO:0098751	bone cell development	Biological process	1.34488	0.0451978	up
GO:0048512	circadian behavior	Biological process	1.34295	0.0453994	up
GO:0042552	myelination	Biological process	1.34195	0.0455039	up
GO:0048545	response to steroid hormone	Biological process	1.33948	0.0457633	up
GO:0048562	embryonic organ morphogenesis	Biological process	1.33897	0.0458172	up
GO:0019538	protein metabolic process	Biological process	1.3376	0.0459619	up
GO:0051261	protein depolymerization	Biological process	1.33306	0.0464448	up
GO:0002520	immune system development	Biological process	1.33131	0.0466329	up
GO:0044344	cellular response to fibroblast growth factor stimulus	Biological process	1.33076	0.0466923	up
GO:0048584	positive regulation of response to stimulus	Biological process	1.3296	0.0468163	up
GO:1904064	positive regulation of cation transmembrane transport	Biological process	1.32687	0.0471124	up
GO:0007045	cell-substrate adherens junction assembly	Biological process	1.32595	0.0472116	up
GO:0048041	focal adhesion assembly	Biological process	1.32595	0.0472116	up
GO:0070664	negative regulation of leukocyte proliferation	Biological process	1.32595	0.0472116	up
GO:0032409	regulation of transporter activity	Biological process	1.32526	0.0472863	up
GO:0034333	adherens junction assembly	Biological process	1.32396	0.047429	up
GO:0071248	cellular response to metal ion	Biological process	1.32388	0.0474372	up
GO:1903510	mucopolysaccharide metabolic process	Biological process	1.31493	0.048425	up
GO:0051893	regulation of focal adhesion assembly	Biological process	1.31295	0.0486459	up
GO:0090109	regulation of cell-substrate junction assembly	Biological process	1.31295	0.0486459	up
GO:0097190	apoptotic signaling pathway	Biological process	1.31022	0.0489532	up
GO:0009649	entrainment of circadian clock	Biological process	1.3098	0.049	up
GO:0031114	regulation of microtubule depolymerization	Biological process	1.3098	0.049	up
GO:0032673	regulation of interleukin-4 production	Biological process	1.3098	0.049	up
GO:0048668	collateral sprouting	Biological process	1.3098	0.049	up
GO:0090383	phagosome acidification	Biological process	1.3098	0.049	up
GO:0071702	organic substance transport	Biological process	1.30878	0.0491155	up
GO:0044260	cellular macromolecule metabolic process	Biological process	1.30842	0.0491568	up
GO:0097458	neuron part	Cellular component	8.31073	4.88954e-09	up
GO:0044459	plasma membrane part	Cellular component	7.88615	1.29973e-08	up
GO:0043005	neuron projection	Cellular component	6.56943	2.69507e-07	up
GO:0005886	plasma membrane	Cellular component	6.31261	4.8684e-07	up
GO:0071944	cell periphery	Cellular component	6.08455	8.2309e-07	up
GO:0033267	axon part	Cellular component	5.9958	1.00971e-06	up
GO:0045202	synapse	Cellular component	5.62762	2.35713e-06	up
GO:0150034	distal axon	Cellular component	5.35625	4.40301e-06	up
GO:0030424	axon	Cellular component	5.34469	4.5218e-06	up
GO:0044425	membrane part	Cellular component	5.23952	5.76072e-06	up
GO:0044463	cell projection part	Cellular component	4.96927	1.07332e-05	up
GO:0120038	plasma membrane bounded cell projection part	Cellular component	4.96927	1.07332e-05	up
GO:0043679	axon terminus	Cellular component	4.88171	1.31309e-05	up
GO:0098588	bounding membrane of organelle	Cellular component	4.58482	2.60121e-05	up
GO:0030425	dendrite	Cellular component	4.52376	2.99394e-05	up
GO:0097447	dendritic tree	Cellular component	4.49905	3.16922e-05	up
GO:0098793	presynapse	Cellular component	4.44418	3.59604e-05	up
GO:0044306	neuron projection terminus	Cellular component	4.42726	3.73886e-05	up
GO:0036477	somatodendritic compartment	Cellular component	4.38523	4.11877e-05	up
GO:0030054	cell junction	Cellular component	4.31822	4.80596e-05	up
GO:0043195	terminal bouton	Cellular component	4.23191	5.8626e-05	up
GO:0030125	clathrin vesicle coat	Cellular component	3.99468	0.000101233	up
GO:0044456	synapse part	Cellular component	3.81685	0.000152459	up
GO:0042995	cell projection	Cellular component	3.81416	0.000153403	up
GO:0120025	plasma membrane bounded cell projection	Cellular component	3.7141	0.000193153	up
GO:0005623	cell	Cellular component	3.61078	0.000245033	up
GO:0016020	membrane	Cellular component	3.60239	0.000249812	up
GO:0031226	intrinsic component of plasma membrane	Cellular component	3.4441	0.000359662	up
GO:0044464	cell part	Cellular component	3.43288	0.000369084	up
GO:0030666	endocytic vesicle membrane	Cellular component	3.38208	0.000414875	up
GO:0005887	integral component of plasma membrane	Cellular component	3.34617	0.000450638	up
GO:0005794	Golgi apparatus	Cellular component	3.34211	0.000454878	up
GO:0030128	clathrin coat of endocytic vesicle	Cellular component	3.30556	0.000494808	up
GO:0098805	whole membrane	Cellular component	3.21178	0.000614071	up
GO:0030665	clathrin-coated vesicle membrane	Cellular component	3.15126	0.000705894	up
GO:0012505	endomembrane system	Cellular component	3.10361	0.000787753	up
GO:0012506	vesicle membrane	Cellular component	2.89681	0.00126822	up
GO:0098590	plasma membrane region	Cellular component	2.8772	0.00132677	up
GO:0031410	cytoplasmic vesicle	Cellular component	2.8603	0.00137943	up
GO:0030659	cytoplasmic vesicle membrane	Cellular component	2.85514	0.00139593	up
GO:0097708	intracellular vesicle	Cellular component	2.83225	0.00147147	up
GO:0044297	cell body	Cellular component	2.7115	0.00194314	up
GO:0031224	intrinsic component of membrane	Cellular component	2.67986	0.00208996	up
GO:0031253	cell projection membrane	Cellular component	2.67671	0.0021052	up
GO:0005667	transcription factor complex	Cellular component	2.61869	0.00240607	up
GO:0098797	plasma membrane protein complex	Cellular component	2.60581	0.00247848	up
GO:0001518	voltage-gated sodium channel complex	Cellular component	2.57053	0.00268828	up
GO:0030122	AP-2 adaptor complex	Cellular component	2.57053	0.00268828	up
GO:0043025	neuronal cell body	Cellular component	2.46868	0.00339876	up
GO:0048786	presynaptic active zone	Cellular component	2.42339	0.00377232	up
GO:0005829	cytosol	Cellular component	2.40623	0.00392438	up
GO:0030669	clathrin-coated endocytic vesicle membrane	Cellular component	2.38817	0.00409099	up
GO:0030662	coated vesicle membrane	Cellular component	2.32986	0.0046789	up
GO:0030658	transport vesicle membrane	Cellular component	2.27257	0.00533865	up
GO:0016021	integral component of membrane	Cellular component	2.25811	0.00551931	up
GO:0031090	organelle membrane	Cellular component	2.23605	0.00580691	up
GO:0034706	sodium channel complex	Cellular component	2.22695	0.00592996	up
GO:0097381	photoreceptor disc membrane	Cellular component	2.22695	0.00592996	up
GO:0045334	clathrin-coated endocytic vesicle	Cellular component	2.21885	0.0060416	up
GO:0098552	side of membrane	Cellular component	2.18732	0.00649649	up
GO:0001917	photoreceptor inner segment	Cellular component	2.18532	0.00652653	up
GO:0030139	endocytic vesicle	Cellular component	2.18034	0.0066017	up
GO:0030670	phagocytic vesicle membrane	Cellular component	2.14982	0.00708236	up
GO:0090575	RNA polymerase II transcription factor complex	Cellular component	2.14807	0.00711095	up
GO:0030120	vesicle coat	Cellular component	2.1386	0.00726782	up
GO:0000792	heterochromatin	Cellular component	2.10177	0.00791094	up
GO:0019005	SCF ubiquitin ligase complex	Cellular component	2.08268	0.00826646	up
GO:0044431	Golgi apparatus part	Cellular component	2.05163	0.00887915	up
GO:0005768	endosome	Cellular component	2.02749	0.00938668	up
GO:0030118	clathrin coat	Cellular component	2.0024	0.00994497	up
GO:0001772	immunological synapse	Cellular component	1.99522	0.0101107	up
GO:0015629	actin cytoskeleton	Cellular component	1.99329	0.0101558	up
GO:0044433	cytoplasmic vesicle part	Cellular component	1.96803	0.010764	up
GO:0014704	intercalated disc	Cellular component	1.94538	0.0113402	up
GO:0030132	clathrin coat of coated pit	Cellular component	1.94336	0.011393	up
GO:0045335	phagocytic vesicle	Cellular component	1.94034	0.0114726	up
GO:0044444	cytoplasmic part	Cellular component	1.92202	0.0119668	up
GO:0031982	vesicle	Cellular component	1.92077	0.0120013	up
GO:0009986	cell surface	Cellular component	1.91558	0.0121458	up
GO:0045095	keratin filament	Cellular component	1.86892	0.0135231	up
GO:0031461	cullin-RING ubiquitin ligase complex	Cellular component	1.84741	0.0142098	up
GO:0042734	presynaptic membrane	Cellular component	1.83605	0.0145864	up
GO:0030672	synaptic vesicle membrane	Cellular component	1.83209	0.01472	up
GO:0099501	exocytic vesicle membrane	Cellular component	1.83209	0.01472	up
GO:0070382	exocytic vesicle	Cellular component	1.7969	0.0159626	up
GO:0036452	ESCRT complex	Cellular component	1.79467	0.0160446	up
GO:0098796	membrane protein complex	Cellular component	1.76042	0.0173612	up
GO:0031234	extrinsic component of cytoplasmic side of plasma membrane	Cellular component	1.75293	0.0176631	up
GO:0044304	main axon	Cellular component	1.73343	0.0184742	up
GO:0031941	filamentous actin	Cellular component	1.72665	0.0187651	up
GO:0030133	transport vesicle	Cellular component	1.69518	0.0201754	up
GO:0042629	mast cell granule	Cellular component	1.66972	0.0213936	up
GO:0010008	endosome membrane	Cellular component	1.66756	0.0215003	up
GO:0005796	Golgi lumen	Cellular component	1.65827	0.021965	up
GO:0000323	lytic vacuole	Cellular component	1.65537	0.0221122	up
GO:0005764	lysosome	Cellular component	1.65537	0.0221122	up
GO:0060077	inhibitory synapse	Cellular component	1.65325	0.0222202	up
GO:0030131	clathrin adaptor complex	Cellular component	1.65259	0.0222542	up
GO:0030119	AP-type membrane coat adaptor complex	Cellular component	1.64374	0.0227124	up
GO:0097060	synaptic membrane	Cellular component	1.63747	0.0230425	up
GO:0008021	synaptic vesicle	Cellular component	1.62348	0.0237969	up
GO:0044798	nuclear transcription factor complex	Cellular component	1.61402	0.0243211	up
GO:0060170	ciliary membrane	Cellular component	1.6045	0.0248598	up
GO:0030863	cortical cytoskeleton	Cellular component	1.59328	0.0255105	up
GO:0005905	clathrin-coated pit	Cellular component	1.56243	0.0273883	up
GO:0005737	cytoplasm	Cellular component	1.55556	0.0278251	up
GO:0030673	axolemma	Cellular component	1.55433	0.0279041	up
GO:0042613	MHC class II protein complex	Cellular component	1.55433	0.0279041	up
GO:0000151	ubiquitin ligase complex	Cellular component	1.54601	0.0284441	up
GO:0120111	neuron projection cytoplasm	Cellular component	1.5225	0.0300265	up
GO:0030117	membrane coat	Cellular component	1.49803	0.0317662	up
GO:0048475	coated membrane	Cellular component	1.49803	0.0317662	up
GO:0005911	cell-cell junction	Cellular component	1.49204	0.0322074	up
GO:0000813	ESCRT I complex	Cellular component	1.46703	0.0341166	up
GO:0001527	microfibril	Cellular component	1.46703	0.0341166	up
GO:0098936	intrinsic component of postsynaptic membrane	Cellular component	1.46703	0.0341166	up
GO:0099055	integral component of postsynaptic membrane	Cellular component	1.46703	0.0341166	up
GO:0099240	intrinsic component of synaptic membrane	Cellular component	1.46703	0.0341166	up
GO:0099699	integral component of synaptic membrane	Cellular component	1.46703	0.0341166	up
GO:0031463	Cul3-RING ubiquitin ligase complex	Cellular component	1.44573	0.0358315	up
GO:0030137	COPI-coated vesicle	Cellular component	1.44566	0.0358373	up
GO:0042611	MHC protein complex	Cellular component	1.44566	0.0358373	up
GO:0034703	cation channel complex	Cellular component	1.43321	0.0368803	up
GO:0000139	Golgi membrane	Cellular component	1.42425	0.0376484	up
GO:0005881	cytoplasmic microtubule	Cellular component	1.42371	0.0376956	up
GO:0099738	cell cortex region	Cellular component	1.40784	0.0390981	up
GO:0005884	actin filament	Cellular component	1.40564	0.0392975	up
GO:0043209	myelin sheath	Cellular component	1.40376	0.0394673	up
GO:0030055	cell-substrate junction	Cellular component	1.38817	0.0409101	up
GO:0030426	growth cone	Cellular component	1.38708	0.0410124	up
GO:0031256	leading edge membrane	Cellular component	1.38101	0.0415901	up
GO:0035371	microtubule plus-end	Cellular component	1.38047	0.0416422	up
GO:1990752	microtubule end	Cellular component	1.3797	0.041716	up
GO:0009898	cytoplasmic side of plasma membrane	Cellular component	1.37688	0.0419879	up
GO:0044448	cell cortex part	Cellular component	1.35858	0.0437946	up
GO:0032279	asymmetric synapse	Cellular component	1.35742	0.0439113	up
GO:0016442	RISC complex	Cellular component	1.35315	0.0443455	up
GO:0031332	RNAi effector complex	Cellular component	1.35315	0.0443455	up
GO:0098562	cytoplasmic side of membrane	Cellular component	1.35294	0.044367	up
GO:0005856	cytoskeleton	Cellular component	1.34909	0.0447624	up
GO:0019898	extrinsic component of membrane	Cellular component	1.34501	0.045185	up
GO:0044424	intracellular part	Cellular component	1.31512	0.0484043	up
GO:0016327	apicolateral plasma membrane	Cellular component	1.30357	0.0497087	up
GO:0098984	neuron to neuron synapse	Cellular component	1.30253	0.0498281	up
GO:0000977	RNA polymerase II regulatory region sequence-specific DNA binding	Molecular function	7.31017	4.89589e-08	up
GO:0044212	transcription regulatory region DNA binding	Molecular function	7.257	5.53355e-08	up
GO:0001067	regulatory region nucleic acid binding	Molecular function	7.23089	5.87633e-08	up
GO:0001012	RNA polymerase II regulatory region DNA binding	Molecular function	7.21896	6.04009e-08	up
GO:0000981	RNA polymerase II transcription factor activity, sequence-specific DNA binding	Molecular function	7.01694	9.61736e-08	up
GO:0000976	transcription regulatory region sequence-specific DNA binding	Molecular function	6.79968	1.58607e-07	up
GO:1990837	sequence-specific double-stranded DNA binding	Molecular function	6.12237	7.54453e-07	up
GO:0000987	proximal promoter sequence-specific DNA binding	Molecular function	5.27745	5.27898e-06	up
GO:0043565	sequence-specific DNA binding	Molecular function	5.24811	5.64797e-06	up
GO:0003690	double-stranded DNA binding	Molecular function	5.15082	7.06615e-06	up
GO:0000978	RNA polymerase II proximal promoter sequence-specific DNA binding	Molecular function	5.13123	7.39222e-06	up
GO:0001228	transcriptional activator activity, RNA polymerase II transcription regulatory region sequence-specific DNA binding	Molecular function	4.50744	3.10855e-05	up
GO:0000982	transcription factor activity, RNA polymerase II proximal promoter sequence-specific DNA binding	Molecular function	4.27579	5.29919e-05	up
GO:0140110	transcription regulator activity	Molecular function	3.88367	0.000130716	up
GO:0003700	DNA binding transcription factor activity	Molecular function	3.7836	0.00016459	up
GO:0008020	G-protein coupled photoreceptor activity	Molecular function	3.71465	0.000192908	up
GO:0001077	transcriptional activator activity, RNA polymerase II proximal promoter sequence-specific DNA binding	Molecular function	3.5829	0.000261278	up
GO:0009881	photoreceptor activity	Molecular function	3.30671	0.0004935	up
GO:0005326	neurotransmitter transporter activity	Molecular function	3.26046	0.000548961	up
GO:0046875	ephrin receptor binding	Molecular function	3.21657	0.000607335	up
GO:0016918	retinal binding	Molecular function	3.131	0.000739604	up
GO:0015294	solute:cation symporter activity	Molecular function	3.1037	0.000787594	up
GO:0008324	cation transmembrane transporter activity	Molecular function	3.00704	0.000983928	up
GO:0005515	protein binding	Molecular function	2.95198	0.00111692	up
GO:0022890	inorganic cation transmembrane transporter activity	Molecular function	2.92641	0.00118465	up
GO:0001205	transcriptional activator activity, RNA polymerase II distal enhancer sequence-specific DNA binding	Molecular function	2.59576	0.0025365	up
GO:0046873	metal ion transmembrane transporter activity	Molecular function	2.53229	0.00293566	up
GO:0035591	signaling adaptor activity	Molecular function	2.52146	0.00300982	up
GO:0015077	monovalent inorganic cation transmembrane transporter activity	Molecular function	2.5085	0.00310098	up
GO:0005501	retinoid binding	Molecular function	2.50836	0.00310195	up
GO:0003705	transcription factor activity, RNA polymerase II distal enhancer sequence-specific binding	Molecular function	2.46123	0.00345758	up
GO:0005416	amino acid:cation symporter activity	Molecular function	2.44134	0.00361955	up
GO:0008373	sialyltransferase activity	Molecular function	2.44134	0.00361955	up
GO:0019840	isoprenoid binding	Molecular function	2.42473	0.0037607	up
GO:0005509	calcium ion binding	Molecular function	2.41549	0.00384162	up
GO:0015081	sodium ion transmembrane transporter activity	Molecular function	2.33793	0.00459271	up
GO:0003779	actin binding	Molecular function	2.17203	0.00672934	up
GO:0019900	kinase binding	Molecular function	2.17025	0.00675688	up
GO:0047485	protein N-terminus binding	Molecular function	2.13385	0.00734759	up
GO:0003713	transcription coactivator activity	Molecular function	2.06535	0.00860307	up
GO:0000989	transcription factor activity, transcription factor binding	Molecular function	2.05815	0.00874675	up
GO:0030295	protein kinase activator activity	Molecular function	2.05659	0.00877826	up
GO:0060090	molecular adaptor activity	Molecular function	2.04357	0.0090454	up
GO:0005070	SH3/SH2 adaptor activity	Molecular function	2.02988	0.00933518	up
GO:0005247	voltage-gated chloride channel activity	Molecular function	2.01592	0.00964015	up
GO:0030548	acetylcholine receptor regulator activity	Molecular function	2.01592	0.00964015	up
GO:0099602	neurotransmitter receptor regulator activity	Molecular function	2.01592	0.00964015	up
GO:0000988	transcription factor activity, protein binding	Molecular function	1.98761	0.0102894	up
GO:0019899	enzyme binding	Molecular function	1.96944	0.010729	up
GO:0051015	actin filament binding	Molecular function	1.94776	0.0112782	up
GO:0030296	protein tyrosine kinase activator activity	Molecular function	1.94418	0.0113716	up
GO:0005328	neurotransmitter:sodium symporter activity	Molecular function	1.87252	0.0134116	up
GO:0015175	neutral amino acid transmembrane transporter activity	Molecular function	1.85607	0.0139294	up
GO:0031683	G-protein beta/gamma-subunit complex binding	Molecular function	1.84641	0.0142425	up
GO:0008092	cytoskeletal protein binding	Molecular function	1.82552	0.0149445	up
GO:0042605	peptide antigen binding	Molecular function	1.7956	0.0160105	up
GO:0031625	ubiquitin protein ligase binding	Molecular function	1.78905	0.0162537	up
GO:0001227	transcriptional repressor activity, RNA polymerase II transcription regulatory region sequence-specific DNA binding	Molecular function	1.78604	0.0163667	up
GO:0044325	ion channel binding	Molecular function	1.78365	0.0164568	up
GO:0015075	ion transmembrane transporter activity	Molecular function	1.78195	0.0165214	up
GO:0030546	receptor activator activity	Molecular function	1.7625	0.0172781	up
GO:0051020	GTPase binding	Molecular function	1.76105	0.0173361	up
GO:0015171	amino acid transmembrane transporter activity	Molecular function	1.75695	0.0175006	up
GO:0019209	kinase activator activity	Molecular function	1.75695	0.0175006	up
GO:0005272	sodium channel activity	Molecular function	1.75159	0.0177178	up
GO:0015318	inorganic molecular entity transmembrane transporter activity	Molecular function	1.7406	0.0181718	up
GO:0015293	symporter activity	Molecular function	1.7268	0.0187587	up
GO:0030234	enzyme regulator activity	Molecular function	1.68988	0.0204229	up
GO:0017137	Rab GTPase binding	Molecular function	1.68818	0.0205032	up
GO:0019901	protein kinase binding	Molecular function	1.67626	0.0210737	up
GO:0015932	nucleobase-containing compound transmembrane transporter activity	Molecular function	1.66749	0.0215037	up
GO:0022857	transmembrane transporter activity	Molecular function	1.66252	0.0217512	up
GO:0030695	GTPase regulator activity	Molecular function	1.65888	0.021934	up
GO:0005343	organic acid:sodium symporter activity	Molecular function	1.65348	0.0222085	up
GO:0001190	transcriptional activator activity, RNA polymerase II transcription factor binding	Molecular function	1.64694	0.0225455	up
GO:0031267	small GTPase binding	Molecular function	1.62729	0.023589	up
GO:0050839	cell adhesion molecule binding	Molecular function	1.62168	0.0238959	up
GO:0005244	voltage-gated ion channel activity	Molecular function	1.6091	0.0245983	up
GO:0022832	voltage-gated channel activity	Molecular function	1.6091	0.0245983	up
GO:0003730	mRNA 3'-UTR binding	Molecular function	1.60477	0.0248443	up
GO:0005248	voltage-gated sodium channel activity	Molecular function	1.59101	0.0256443	up
GO:0070412	R-SMAD binding	Molecular function	1.59101	0.0256443	up
GO:0015370	solute:sodium symporter activity	Molecular function	1.5829	0.0261276	up
GO:0017016	Ras GTPase binding	Molecular function	1.57829	0.0264066	up
GO:0017160	Ral GTPase binding	Molecular function	1.55496	0.0278639	up
GO:0023026	MHC class II protein complex binding	Molecular function	1.55496	0.0278639	up
GO:0098772	molecular function regulator	Molecular function	1.53685	0.0290501	up
GO:0044389	ubiquitin-like protein ligase binding	Molecular function	1.53643	0.0290782	up
GO:0003712	transcription cofactor activity	Molecular function	1.52789	0.0296557	up
GO:0022839	ion gated channel activity	Molecular function	1.5247	0.0298747	up
GO:0030674	protein binding, bridging	Molecular function	1.5152	0.0305353	up
GO:0003707	steroid hormone receptor activity	Molecular function	1.5072	0.0311029	up
GO:0005488	binding	Molecular function	1.49933	0.0316715	up
GO:0022836	gated channel activity	Molecular function	1.47566	0.0334453	up
GO:0005351	carbohydrate:proton symporter activity	Molecular function	1.46752	0.0340786	up
GO:0016208	AMP binding	Molecular function	1.46752	0.0340786	up
GO:0019203	carbohydrate phosphatase activity	Molecular function	1.46752	0.0340786	up
GO:0043121	neurotrophin binding	Molecular function	1.46752	0.0340786	up
GO:0050308	sugar-phosphatase activity	Molecular function	1.46752	0.0340786	up
GO:0043539	protein serine/threonine kinase activator activity	Molecular function	1.46551	0.0342363	up
GO:0005283	amino acid:sodium symporter activity	Molecular function	1.46437	0.0343263	up
GO:0055106	ubiquitin-protein transferase regulator activity	Molecular function	1.46437	0.0343263	up
GO:0005261	cation channel activity	Molecular function	1.4642	0.0343403	up
GO:0015295	solute:proton symporter activity	Molecular function	1.44639	0.0357773	up
GO:0030371	translation repressor activity	Molecular function	1.44639	0.0357773	up
GO:0030547	receptor inhibitor activity	Molecular function	1.44639	0.0357773	up
GO:0090482	vitamin transmembrane transporter activity	Molecular function	1.44639	0.0357773	up
GO:0050840	extracellular matrix binding	Molecular function	1.40835	0.0390528	up
GO:0005096	GTPase activator activity	Molecular function	1.39795	0.039999	up
GO:0005102	signaling receptor binding	Molecular function	1.38761	0.0409632	up
GO:0008308	voltage-gated anion channel activity	Molecular function	1.38107	0.0415848	up
GO:0030507	spectrin binding	Molecular function	1.38041	0.0416475	up
GO:0043325	phosphatidylinositol-3,4-bisphosphate binding	Molecular function	1.38041	0.0416475	up
GO:0005516	calmodulin binding	Molecular function	1.37539	0.0421319	up
GO:0008047	enzyme activator activity	Molecular function	1.36683	0.0429707	up
GO:0045182	translation regulator activity	Molecular function	1.36565	0.0430875	up
GO:0001784	phosphotyrosine residue binding	Molecular function	1.35443	0.0442155	up
GO:0004532	exoribonuclease activity	Molecular function	1.35443	0.0442155	up
GO:0045309	protein phosphorylated amino acid binding	Molecular function	1.3535	0.0443103	up
GO:0005215	transporter activity	Molecular function	1.35115	0.0445503	up
GO:0060589	nucleoside-triphosphatase regulator activity	Molecular function	1.32935	0.0468433	up
GO:0001158	enhancer sequence-specific DNA binding	Molecular function	1.31152	0.0488067	up
GO:0046332	SMAD binding	Molecular function	1.30495	0.0495502	up
GO:0001133	RNA polymerase II transcription factor activity, sequence-specific transcription regulatory region DNA binding	Molecular function	1.30415	0.0496417	up
GO:0038191	neuropilin binding	Molecular function	1.30415	0.0496417	up
GO:0000979	RNA polymerase II core promoter sequence-specific DNA binding	Molecular function	1.30261	0.0498185	up
GO:1901505	carbohydrate derivative transmembrane transporter activity	Molecular function	1.30261	0.0498185	up
GO:1901981	phosphatidylinositol phosphate binding	Molecular function	1.30195	0.0498945	up
GO:0051173	positive regulation of nitrogen compound metabolic process	Biological process	10.9163	1.21243e-11	down
GO:0031325	positive regulation of cellular metabolic process	Biological process	10.4168	3.83018e-11	down
GO:0010557	positive regulation of macromolecule biosynthetic process	Biological process	10.005	9.88466e-11	down
GO:0010604	positive regulation of macromolecule metabolic process	Biological process	9.94803	1.12711e-10	down
GO:0031328	positive regulation of cellular biosynthetic process	Biological process	9.72823	1.86968e-10	down
GO:0009893	positive regulation of metabolic process	Biological process	9.42356	3.77087e-10	down
GO:0009891	positive regulation of biosynthetic process	Biological process	9.20447	6.24498e-10	down
GO:0051254	positive regulation of RNA metabolic process	Biological process	9.03729	9.17717e-10	down
GO:0006357	regulation of transcription by RNA polymerase II	Biological process	8.86033	1.37935e-09	down
GO:0045893	positive regulation of transcription, DNA-templated	Biological process	8.55264	2.80128e-09	down
GO:1903508	positive regulation of nucleic acid-templated transcription	Biological process	8.55264	2.80128e-09	down
GO:1902680	positive regulation of RNA biosynthetic process	Biological process	8.53351	2.92745e-09	down
GO:0048522	positive regulation of cellular process	Biological process	8.32626	4.71777e-09	down
GO:0010628	positive regulation of gene expression	Biological process	8.10001	7.94302e-09	down
GO:0048518	positive regulation of biological process	Biological process	7.83844	1.45064e-08	down
GO:0006366	transcription by RNA polymerase II	Biological process	7.76907	1.70189e-08	down
GO:0031323	regulation of cellular metabolic process	Biological process	7.4922	3.21957e-08	down
GO:0061138	morphogenesis of a branching epithelium	Biological process	7.34078	4.56267e-08	down
GO:0035295	tube development	Biological process	7.11821	7.61711e-08	down
GO:0051252	regulation of RNA metabolic process	Biological process	7.07013	8.50879e-08	down
GO:0045935	positive regulation of nucleobase-containing compound metabolic process	Biological process	6.98571	1.03346e-07	down
GO:0048754	branching morphogenesis of an epithelial tube	Biological process	6.95021	1.12147e-07	down
GO:2000112	regulation of cellular macromolecule biosynthetic process	Biological process	6.88064	1.31631e-07	down
GO:0040007	growth	Biological process	6.87418	1.33603e-07	down
GO:0051171	regulation of nitrogen compound metabolic process	Biological process	6.79213	1.61388e-07	down
GO:0060255	regulation of macromolecule metabolic process	Biological process	6.66559	2.15978e-07	down
GO:0001763	morphogenesis of a branching structure	Biological process	6.65259	2.22542e-07	down
GO:0010556	regulation of macromolecule biosynthetic process	Biological process	6.62492	2.37181e-07	down
GO:0045944	positive regulation of transcription by RNA polymerase II	Biological process	6.6232	2.38121e-07	down
GO:0051247	positive regulation of protein metabolic process	Biological process	6.5058	3.12035e-07	down
GO:0048729	tissue morphogenesis	Biological process	6.50211	3.14698e-07	down
GO:0009790	embryo development	Biological process	6.49082	3.22983e-07	down
GO:0048856	anatomical structure development	Biological process	6.45526	3.50544e-07	down
GO:0007275	multicellular organism development	Biological process	6.42338	3.77242e-07	down
GO:0007399	nervous system development	Biological process	6.36631	4.30218e-07	down
GO:0048731	system development	Biological process	6.34229	4.54685e-07	down
GO:0080090	regulation of primary metabolic process	Biological process	6.33924	4.57892e-07	down
GO:0009653	anatomical structure morphogenesis	Biological process	6.30137	4.99611e-07	down
GO:0001932	regulation of protein phosphorylation	Biological process	6.2984	5.03032e-07	down
GO:0060562	epithelial tube morphogenesis	Biological process	6.26785	5.39698e-07	down
GO:0040008	regulation of growth	Biological process	6.25468	5.56319e-07	down
GO:0048598	embryonic morphogenesis	Biological process	6.21721	6.06436e-07	down
GO:0045859	regulation of protein kinase activity	Biological process	6.19323	6.40876e-07	down
GO:0051338	regulation of transferase activity	Biological process	6.18971	6.46092e-07	down
GO:0032270	positive regulation of cellular protein metabolic process	Biological process	6.16418	6.85197e-07	down
GO:0031326	regulation of cellular biosynthetic process	Biological process	6.07172	8.47776e-07	down
GO:0019219	regulation of nucleobase-containing compound metabolic process	Biological process	6.06214	8.66676e-07	down
GO:0006355	regulation of transcription, DNA-templated	Biological process	6.02673	9.4031e-07	down
GO:0007049	cell cycle	Biological process	6.01321	9.70031e-07	down
GO:0035239	tube morphogenesis	Biological process	6.01167	9.73494e-07	down
GO:1903506	regulation of nucleic acid-templated transcription	Biological process	5.97844	1.05088e-06	down
GO:0042325	regulation of phosphorylation	Biological process	5.97194	1.06674e-06	down
GO:0031399	regulation of protein modification process	Biological process	5.9167	1.21143e-06	down
GO:0009889	regulation of biosynthetic process	Biological process	5.91222	1.22398e-06	down
GO:2001141	regulation of RNA biosynthetic process	Biological process	5.89892	1.26207e-06	down
GO:0030182	neuron differentiation	Biological process	5.87025	1.34819e-06	down
GO:2000027	regulation of organ morphogenesis	Biological process	5.80573	1.56411e-06	down
GO:0044260	cellular macromolecule metabolic process	Biological process	5.7952	1.60251e-06	down
GO:0050793	regulation of developmental process	Biological process	5.74775	1.7875e-06	down
GO:0002009	morphogenesis of an epithelium	Biological process	5.73593	1.83684e-06	down
GO:0051726	regulation of cell cycle	Biological process	5.72338	1.89068e-06	down
GO:0043549	regulation of kinase activity	Biological process	5.70062	1.99241e-06	down
GO:0019222	regulation of metabolic process	Biological process	5.6902	2.04078e-06	down
GO:0003002	regionalization	Biological process	5.67374	2.11965e-06	down
GO:0048468	cell development	Biological process	5.67218	2.12725e-06	down
GO:0006464	cellular protein modification process	Biological process	5.64386	2.27062e-06	down
GO:0036211	protein modification process	Biological process	5.64386	2.27062e-06	down
GO:0032268	regulation of cellular protein metabolic process	Biological process	5.63965	2.29273e-06	down
GO:2000026	regulation of multicellular organismal development	Biological process	5.5617	2.74346e-06	down
GO:0032502	developmental process	Biological process	5.54528	2.84919e-06	down
GO:0007389	pattern specification process	Biological process	5.48451	3.27709e-06	down
GO:0045165	cell fate commitment	Biological process	5.38127	4.15656e-06	down
GO:0010646	regulation of cell communication	Biological process	5.35688	4.3966e-06	down
GO:0006915	apoptotic process	Biological process	5.23275	5.85125e-06	down
GO:0045595	regulation of cell differentiation	Biological process	5.2282	5.91292e-06	down
GO:0007167	enzyme linked receptor protein signaling pathway	Biological process	5.20774	6.19808e-06	down
GO:0043412	macromolecule modification	Biological process	5.20611	6.22139e-06	down
GO:0009954	proximal/distal pattern formation	Biological process	5.19434	6.39238e-06	down
GO:0009887	animal organ morphogenesis	Biological process	5.18449	6.53893e-06	down
GO:0023051	regulation of signaling	Biological process	5.16078	6.90582e-06	down
GO:0060429	epithelium development	Biological process	5.11647	7.64761e-06	down
GO:0006351	transcription, DNA-templated	Biological process	5.10427	7.8656e-06	down
GO:0048519	negative regulation of biological process	Biological process	5.10312	7.88644e-06	down
GO:0097659	nucleic acid-templated transcription	Biological process	5.09859	7.96908e-06	down
GO:0023056	positive regulation of signaling	Biological process	5.06998	8.5118e-06	down
GO:0002064	epithelial cell development	Biological process	5.05907	8.72834e-06	down
GO:0010468	regulation of gene expression	Biological process	5.05048	8.90258e-06	down
GO:0048589	developmental growth	Biological process	5.04503	9.01519e-06	down
GO:0060284	regulation of cell development	Biological process	4.97779	1.05247e-05	down
GO:0045665	negative regulation of neuron differentiation	Biological process	4.97673	1.05503e-05	down
GO:0032774	RNA biosynthetic process	Biological process	4.95625	1.106e-05	down
GO:0043009	chordate embryonic development	Biological process	4.95607	1.10643e-05	down
GO:0048699	generation of neurons	Biological process	4.95402	1.11168e-05	down
GO:0010647	positive regulation of cell communication	Biological process	4.95316	1.11389e-05	down
GO:0051239	regulation of multicellular organismal process	Biological process	4.95119	1.11895e-05	down
GO:0051246	regulation of protein metabolic process	Biological process	4.95061	1.12044e-05	down
GO:0009966	regulation of signal transduction	Biological process	4.898	1.26475e-05	down
GO:0006468	protein phosphorylation	Biological process	4.82151	1.50831e-05	down
GO:0051094	positive regulation of developmental process	Biological process	4.80739	1.55814e-05	down
GO:0016310	phosphorylation	Biological process	4.79697	1.59599e-05	down
GO:0048523	negative regulation of cellular process	Biological process	4.79328	1.6096e-05	down
GO:0034654	nucleobase-containing compound biosynthetic process	Biological process	4.78909	1.62521e-05	down
GO:0008284	positive regulation of cell proliferation	Biological process	4.78469	1.64176e-05	down
GO:0009967	positive regulation of signal transduction	Biological process	4.75926	1.74077e-05	down
GO:0051347	positive regulation of transferase activity	Biological process	4.73414	1.84442e-05	down
GO:0001658	branching involved in ureteric bud morphogenesis	Biological process	4.7161	1.92265e-05	down
GO:0035270	endocrine system development	Biological process	4.65813	2.19719e-05	down
GO:0048608	reproductive structure development	Biological process	4.64417	2.26897e-05	down
GO:0071900	regulation of protein serine/threonine kinase activity	Biological process	4.63919	2.29515e-05	down
GO:0071902	positive regulation of protein serine/threonine kinase activity	Biological process	4.6254	2.36917e-05	down
GO:0044843	cell cycle G1/S phase transition	Biological process	4.58873	2.57791e-05	down
GO:0061458	reproductive system development	Biological process	4.56838	2.70161e-05	down
GO:0009792	embryo development ending in birth or egg hatching	Biological process	4.55761	2.76943e-05	down
GO:0008283	cell proliferation	Biological process	4.5472	2.83659e-05	down
GO:0022402	cell cycle process	Biological process	4.53616	2.90966e-05	down
GO:1901362	organic cyclic compound biosynthetic process	Biological process	4.52716	2.9706e-05	down
GO:0046323	glucose import	Biological process	4.52431	2.9901e-05	down
GO:2000113	negative regulation of cellular macromolecule biosynthetic process	Biological process	4.5084	3.10171e-05	down
GO:0031401	positive regulation of protein modification process	Biological process	4.50705	3.11134e-05	down
GO:0051174	regulation of phosphorus metabolic process	Biological process	4.48173	3.29815e-05	down
GO:0034645	cellular macromolecule biosynthetic process	Biological process	4.47505	3.34928e-05	down
GO:0045892	negative regulation of transcription, DNA-templated	Biological process	4.46824	3.40218e-05	down
GO:1901699	cellular response to nitrogen compound	Biological process	4.4556	3.50265e-05	down
GO:0048562	embryonic organ morphogenesis	Biological process	4.43101	3.70668e-05	down
GO:0000082	G1/S transition of mitotic cell cycle	Biological process	4.42946	3.71997e-05	down
GO:0018130	heterocycle biosynthetic process	Biological process	4.42491	3.75914e-05	down
GO:0071310	cellular response to organic substance	Biological process	4.42385	3.76832e-05	down
GO:1903507	negative regulation of nucleic acid-templated transcription	Biological process	4.41277	3.86575e-05	down
GO:0008219	cell death	Biological process	4.40333	3.95062e-05	down
GO:0016070	RNA metabolic process	Biological process	4.39936	3.98697e-05	down
GO:1902679	negative regulation of RNA biosynthetic process	Biological process	4.38455	4.1252e-05	down
GO:0045664	regulation of neuron differentiation	Biological process	4.37941	4.17435e-05	down
GO:0070887	cellular response to chemical stimulus	Biological process	4.37271	4.23929e-05	down
GO:0048568	embryonic organ development	Biological process	4.37266	4.23971e-05	down
GO:0044249	cellular biosynthetic process	Biological process	4.36884	4.2772e-05	down
GO:0019438	aromatic compound biosynthetic process	Biological process	4.36253	4.33983e-05	down
GO:0010558	negative regulation of macromolecule biosynthetic process	Biological process	4.36166	4.34851e-05	down
GO:0030278	regulation of ossification	Biological process	4.36015	4.36366e-05	down
GO:0007169	transmembrane receptor protein tyrosine kinase signaling pathway	Biological process	4.35418	4.42404e-05	down
GO:0060675	ureteric bud morphogenesis	Biological process	4.31847	4.80321e-05	down
GO:0045582	positive regulation of T cell differentiation	Biological process	4.31241	4.87064e-05	down
GO:0072078	nephron tubule morphogenesis	Biological process	4.31241	4.87064e-05	down
GO:0019220	regulation of phosphate metabolic process	Biological process	4.29881	5.02561e-05	down
GO:0060993	kidney morphogenesis	Biological process	4.29441	5.07683e-05	down
GO:0070848	response to growth factor	Biological process	4.28231	5.22029e-05	down
GO:0010033	response to organic substance	Biological process	4.27842	5.26719e-05	down
GO:0000122	negative regulation of transcription by RNA polymerase II	Biological process	4.26349	5.45147e-05	down
GO:0120036	plasma membrane bounded cell projection organization	Biological process	4.26167	5.47428e-05	down
GO:0051128	regulation of cellular component organization	Biological process	4.25994	5.49618e-05	down
GO:0090304	nucleic acid metabolic process	Biological process	4.2572	5.53099e-05	down
GO:0043410	positive regulation of MAPK cascade	Biological process	4.25471	5.56276e-05	down
GO:0000289	nuclear-transcribed mRNA poly(A) tail shortening	Biological process	4.25465	5.56354e-05	down
GO:0006928	movement of cell or subcellular component	Biological process	4.24758	5.65489e-05	down
GO:0022008	neurogenesis	Biological process	4.24478	5.69147e-05	down
GO:0072171	mesonephric tubule morphogenesis	Biological process	4.24427	5.69807e-05	down
GO:0007267	cell-cell signaling	Biological process	4.24149	5.73475e-05	down
GO:0030030	cell projection organization	Biological process	4.22581	5.94555e-05	down
GO:0051179	localization	Biological process	4.22038	6.02033e-05	down
GO:0007166	cell surface receptor signaling pathway	Biological process	4.20482	6.23996e-05	down
GO:0001934	positive regulation of protein phosphorylation	Biological process	4.19811	6.33712e-05	down
GO:0009059	macromolecule biosynthetic process	Biological process	4.18312	6.55968e-05	down
GO:0072088	nephron epithelium morphogenesis	Biological process	4.17721	6.64949e-05	down
GO:0022603	regulation of anatomical structure morphogenesis	Biological process	4.17396	6.69949e-05	down
GO:0046324	regulation of glucose import	Biological process	4.17171	6.73426e-05	down
GO:0007265	Ras protein signal transduction	Biological process	4.16197	6.88696e-05	down
GO:0007548	sex differentiation	Biological process	4.14713	7.12645e-05	down
GO:0051172	negative regulation of nitrogen compound metabolic process	Biological process	4.12982	7.41626e-05	down
GO:0048638	regulation of developmental growth	Biological process	4.12652	7.47272e-05	down
GO:0030154	cell differentiation	Biological process	4.1137	7.6966e-05	down
GO:0051253	negative regulation of RNA metabolic process	Biological process	4.10541	7.84493e-05	down
GO:0012501	programmed cell death	Biological process	4.104	7.8705e-05	down
GO:0048583	regulation of response to stimulus	Biological process	4.09259	8.07998e-05	down
GO:0051093	negative regulation of developmental process	Biological process	4.09152	8.09998e-05	down
GO:0023057	negative regulation of signaling	Biological process	4.06736	8.56335e-05	down
GO:0061333	renal tubule morphogenesis	Biological process	4.04722	8.96975e-05	down
GO:0072028	nephron morphogenesis	Biological process	4.04722	8.96975e-05	down
GO:0044271	cellular nitrogen compound biosynthetic process	Biological process	4.04291	9.05928e-05	down
GO:0009952	anterior/posterior pattern specification	Biological process	4.03849	9.15182e-05	down
GO:0045860	positive regulation of protein kinase activity	Biological process	4.03699	9.18363e-05	down
GO:0033036	macromolecule localization	Biological process	4.02955	9.34226e-05	down
GO:0048585	negative regulation of response to stimulus	Biological process	4.02786	9.37859e-05	down
GO:1901576	organic substance biosynthetic process	Biological process	4.0204	9.54111e-05	down
GO:0042327	positive regulation of phosphorylation	Biological process	4.0059	9.86503e-05	down
GO:0010827	regulation of glucose transmembrane transport	Biological process	3.98408	0.000103733	down
GO:0006139	nucleobase-containing compound metabolic process	Biological process	3.96641	0.000108041	down
GO:0051216	cartilage development	Biological process	3.96498	0.000108398	down
GO:2000145	regulation of cell motility	Biological process	3.96365	0.000108731	down
GO:1904659	glucose transmembrane transport	Biological process	3.96048	0.000109528	down
GO:0009719	response to endogenous stimulus	Biological process	3.95456	0.000111031	down
GO:1902533	positive regulation of intracellular signal transduction	Biological process	3.9531	0.000111404	down
GO:0045792	negative regulation of cell size	Biological process	3.95137	0.000111848	down
GO:0030155	regulation of cell adhesion	Biological process	3.9424	0.000114182	down
GO:0010648	negative regulation of cell communication	Biological process	3.92837	0.000117931	down
GO:0009968	negative regulation of signal transduction	Biological process	3.91143	0.000122622	down
GO:0060425	lung morphogenesis	Biological process	3.90814	0.000123555	down
GO:0009058	biosynthetic process	Biological process	3.90228	0.000125232	down
GO:0010605	negative regulation of macromolecule metabolic process	Biological process	3.88791	0.000129446	down
GO:0010464	regulation of mesenchymal cell proliferation	Biological process	3.88293	0.000130939	down
GO:0048869	cellular developmental process	Biological process	3.86637	0.00013603	down
GO:0031324	negative regulation of cellular metabolic process	Biological process	3.86466	0.000136567	down
GO:0030334	regulation of cell migration	Biological process	3.86002	0.000138033	down
GO:0048736	appendage development	Biological process	3.83767	0.000145323	down
GO:0060173	limb development	Biological process	3.83767	0.000145323	down
GO:0048646	anatomical structure formation involved in morphogenesis	Biological process	3.82971	0.000148009	down
GO:0048645	animal organ formation	Biological process	3.81849	0.000151882	down
GO:0120035	regulation of plasma membrane bounded cell projection organization	Biological process	3.80432	0.000156922	down
GO:0045927	positive regulation of growth	Biological process	3.80392	0.000157066	down
GO:0040012	regulation of locomotion	Biological process	3.80042	0.000158338	down
GO:0019538	protein metabolic process	Biological process	3.79883	0.000158916	down
GO:0001501	skeletal system development	Biological process	3.79861	0.000158996	down
GO:0033674	positive regulation of kinase activity	Biological process	3.77015	0.000169766	down
GO:0009890	negative regulation of biosynthetic process	Biological process	3.75761	0.000174741	down
GO:0003158	endothelium development	Biological process	3.74214	0.000181075	down
GO:0048706	embryonic skeletal system development	Biological process	3.74214	0.000181075	down
GO:0072080	nephron tubule development	Biological process	3.73703	0.00018322	down
GO:0043170	macromolecule metabolic process	Biological process	3.7368	0.000183317	down
GO:0050767	regulation of neurogenesis	Biological process	3.73657	0.000183415	down
GO:0071702	organic substance transport	Biological process	3.72749	0.000187287	down
GO:0009888	tissue development	Biological process	3.71751	0.000191643	down
GO:0010810	regulation of cell-substrate adhesion	Biological process	3.71272	0.000193769	down
GO:0051301	cell division	Biological process	3.71166	0.000194241	down
GO:0042981	regulation of apoptotic process	Biological process	3.71051	0.000194754	down
GO:0060439	trachea morphogenesis	Biological process	3.70877	0.000195535	down
GO:0040011	locomotion	Biological process	3.70651	0.000196557	down
GO:0048584	positive regulation of response to stimulus	Biological process	3.70111	0.000199016	down
GO:0010721	negative regulation of cell development	Biological process	3.69939	0.000199805	down
GO:0098727	maintenance of cell number	Biological process	3.69773	0.000200573	down
GO:0006807	nitrogen compound metabolic process	Biological process	3.68182	0.000208057	down
GO:0060389	pathway-restricted SMAD protein phosphorylation	Biological process	3.68162	0.000208151	down
GO:0010629	negative regulation of gene expression	Biological process	3.67124	0.000213189	down
GO:0061448	connective tissue development	Biological process	3.67107	0.000213271	down
GO:0001568	blood vessel development	Biological process	3.67029	0.000213654	down
GO:0000278	mitotic cell cycle	Biological process	3.66762	0.000214971	down
GO:0008645	hexose transmembrane transport	Biological process	3.66716	0.0002152	down
GO:0045667	regulation of osteoblast differentiation	Biological process	3.66716	0.0002152	down
GO:0043281	regulation of cysteine-type endopeptidase activity involved in apoptotic process	Biological process	3.66687	0.000215344	down
GO:0030168	platelet activation	Biological process	3.65895	0.000219304	down
GO:1905330	regulation of morphogenesis of an epithelium	Biological process	3.65522	0.000221198	down
GO:0008643	carbohydrate transport	Biological process	3.65014	0.0002238	down
GO:0051241	negative regulation of multicellular organismal process	Biological process	3.64326	0.000227374	down
GO:0051961	negative regulation of nervous system development	Biological process	3.64206	0.000228002	down
GO:1904948	midbrain dopaminergic neuron differentiation	Biological process	3.64152	0.000228287	down
GO:0031327	negative regulation of cellular biosynthetic process	Biological process	3.64053	0.000228807	down
GO:0001655	urogenital system development	Biological process	3.6381	0.000230092	down
GO:0042060	wound healing	Biological process	3.6351	0.000231685	down
GO:0045597	positive regulation of cell differentiation	Biological process	3.63377	0.000232397	down
GO:0061326	renal tubule development	Biological process	3.63078	0.000234002	down
GO:0045621	positive regulation of lymphocyte differentiation	Biological process	3.62921	0.000234848	down
GO:0051270	regulation of cellular component movement	Biological process	3.62895	0.000234991	down
GO:0045596	negative regulation of cell differentiation	Biological process	3.62459	0.00023736	down
GO:0031344	regulation of cell projection organization	Biological process	3.62081	0.000239438	down
GO:0044267	cellular protein metabolic process	Biological process	3.62028	0.000239731	down
GO:0098609	cell-cell adhesion	Biological process	3.6201	0.00023983	down
GO:1904888	cranial skeletal system development	Biological process	3.61551	0.000242378	down
GO:0003401	axis elongation	Biological process	3.61224	0.000244206	down
GO:0034694	response to prostaglandin	Biological process	3.61224	0.000244206	down
GO:0016331	morphogenesis of embryonic epithelium	Biological process	3.6102	0.000245357	down
GO:0072359	circulatory system development	Biological process	3.6079	0.000246658	down
GO:0008584	male gonad development	Biological process	3.60575	0.000247886	down
GO:0072006	nephron development	Biological process	3.60575	0.000247886	down
GO:0060560	developmental growth involved in morphogenesis	Biological process	3.60293	0.0002495	down
GO:0072001	renal system development	Biological process	3.58681	0.000258936	down
GO:0046661	male sex differentiation	Biological process	3.58264	0.000261432	down
GO:0021871	forebrain regionalization	Biological process	3.58084	0.000262517	down
GO:0034695	response to prostaglandin E	Biological process	3.58084	0.000262517	down
GO:0015749	monosaccharide transmembrane transport	Biological process	3.57477	0.000266213	down
GO:0043406	positive regulation of MAP kinase activity	Biological process	3.57295	0.000267329	down
GO:0006793	phosphorus metabolic process	Biological process	3.57261	0.000267544	down
GO:0016049	cell growth	Biological process	3.57138	0.000268302	down
GO:0043067	regulation of programmed cell death	Biological process	3.56585	0.000271741	down
GO:0046546	development of primary male sexual characteristics	Biological process	3.56448	0.000272599	down
GO:0045934	negative regulation of nucleobase-containing compound metabolic process	Biological process	3.55508	0.000278563	down
GO:0045926	negative regulation of growth	Biological process	3.5514	0.000280932	down
GO:0010463	mesenchymal cell proliferation	Biological process	3.54538	0.00028485	down
GO:0000904	cell morphogenesis involved in differentiation	Biological process	3.54372	0.000285944	down
GO:0016477	cell migration	Biological process	3.5361	0.000291004	down
GO:0007599	hemostasis	Biological process	3.53135	0.000294204	down
GO:0045580	regulation of T cell differentiation	Biological process	3.52243	0.000300313	down
GO:0071363	cellular response to growth factor stimulus	Biological process	3.5207	0.000301512	down
GO:0071559	response to transforming growth factor beta	Biological process	3.51412	0.000306112	down
GO:0060412	ventricular septum morphogenesis	Biological process	3.50807	0.000310407	down
GO:0050817	coagulation	Biological process	3.50728	0.000310971	down
GO:0010811	positive regulation of cell-substrate adhesion	Biological process	3.49983	0.000316352	down
GO:0060536	cartilage morphogenesis	Biological process	3.49531	0.000319664	down
GO:0099563	modification of synaptic structure	Biological process	3.49531	0.000319664	down
GO:0048513	animal organ development	Biological process	3.49337	0.000321089	down
GO:0048663	neuron fate commitment	Biological process	3.48766	0.000325343	down
GO:0071359	cellular response to dsRNA	Biological process	3.48766	0.000325343	down
GO:0034250	positive regulation of cellular amide metabolic process	Biological process	3.48341	0.000328545	down
GO:0051960	regulation of nervous system development	Biological process	3.47908	0.000331836	down
GO:0001657	ureteric bud development	Biological process	3.47781	0.000332803	down
GO:0048640	negative regulation of developmental growth	Biological process	3.47781	0.000332803	down
GO:0050768	negative regulation of neurogenesis	Biological process	3.47585	0.000334307	down
GO:0010941	regulation of cell death	Biological process	3.47407	0.00033568	down
GO:0000902	cell morphogenesis	Biological process	3.46327	0.000344136	down
GO:1902531	regulation of intracellular signal transduction	Biological process	3.45622	0.000349765	down
GO:0032879	regulation of localization	Biological process	3.4438	0.000359916	down
GO:0042127	regulation of cell proliferation	Biological process	3.44172	0.000361639	down
GO:0051240	positive regulation of multicellular organismal process	Biological process	3.44101	0.000362232	down
GO:0022612	gland morphogenesis	Biological process	3.44089	0.000362333	down
GO:0034219	carbohydrate transmembrane transport	Biological process	3.44089	0.000362333	down
GO:0006796	phosphate-containing compound metabolic process	Biological process	3.43414	0.000368014	down
GO:0009892	negative regulation of metabolic process	Biological process	3.43379	0.000368311	down
GO:0044238	primary metabolic process	Biological process	3.43253	0.000369377	down
GO:0046483	heterocycle metabolic process	Biological process	3.43015	0.000371407	down
GO:0072163	mesonephric epithelium development	Biological process	3.42845	0.00037286	down
GO:0072164	mesonephric tubule development	Biological process	3.42845	0.00037286	down
GO:0000079	regulation of cyclin-dependent protein serine/threonine kinase activity	Biological process	3.41329	0.000386107	down
GO:0110020	regulation of actomyosin structure organization	Biological process	3.41329	0.000386107	down
GO:0051492	regulation of stress fiber assembly	Biological process	3.41079	0.000388337	down
GO:0072009	nephron epithelium development	Biological process	3.40698	0.000391762	down
GO:1902041	regulation of extrinsic apoptotic signaling pathway via death domain receptors	Biological process	3.39897	0.000399051	down
GO:0045727	positive regulation of translation	Biological process	3.39747	0.000400429	down
GO:0030217	T cell differentiation	Biological process	3.38737	0.000409854	down
GO:0032869	cellular response to insulin stimulus	Biological process	3.37939	0.000417454	down
GO:0003006	developmental process involved in reproduction	Biological process	3.36793	0.000428614	down
GO:0009611	response to wounding	Biological process	3.36436	0.000432159	down
GO:0030038	contractile actin filament bundle assembly	Biological process	3.36166	0.000434854	down
GO:0043149	stress fiber assembly	Biological process	3.36166	0.000434854	down
GO:0009896	positive regulation of catabolic process	Biological process	3.35883	0.000437696	down
GO:0016043	cellular component organization	Biological process	3.35489	0.000441687	down
GO:0043085	positive regulation of catalytic activity	Biological process	3.34831	0.000448428	down
GO:0048514	blood vessel morphogenesis	Biological process	3.3478	0.000448949	down
GO:0072202	cell differentiation involved in metanephros development	Biological process	3.34494	0.000451923	down
GO:0120039	plasma membrane bounded cell projection morphogenesis	Biological process	3.34455	0.00045232	down
GO:0019827	stem cell population maintenance	Biological process	3.34289	0.000454055	down
GO:0060438	trachea development	Biological process	3.34285	0.000454103	down
GO:0007596	blood coagulation	Biological process	3.34008	0.000456999	down
GO:0032924	activin receptor signaling pathway	Biological process	3.33972	0.000457387	down
GO:0035196	production of miRNAs involved in gene silencing by miRNA	Biological process	3.33972	0.000457387	down
GO:0010562	positive regulation of phosphorus metabolic process	Biological process	3.33836	0.000458815	down
GO:0045937	positive regulation of phosphate metabolic process	Biological process	3.33836	0.000458815	down
GO:0045669	positive regulation of osteoblast differentiation	Biological process	3.33336	0.000464128	down
GO:1901360	organic cyclic compound metabolic process	Biological process	3.33023	0.000467485	down
GO:0048858	cell projection morphogenesis	Biological process	3.31128	0.000488336	down
GO:0032231	regulation of actin filament bundle assembly	Biological process	3.31091	0.00048875	down
GO:0016055	Wnt signaling pathway	Biological process	3.30983	0.000489975	down
GO:0021978	telencephalon regionalization	Biological process	3.30504	0.000495408	down
GO:0000288	nuclear-transcribed mRNA catabolic process, deadenylation-dependent decay	Biological process	3.30087	0.000500182	down
GO:0050794	regulation of cellular process	Biological process	3.29871	0.000502673	down
GO:0006725	cellular aromatic compound metabolic process	Biological process	3.27953	0.000525374	down
GO:0001944	vasculature development	Biological process	3.27629	0.000529315	down
GO:0001558	regulation of cell growth	Biological process	3.27256	0.000533877	down
GO:0198738	cell-cell signaling by wnt	Biological process	3.27224	0.000534267	down
GO:0055024	regulation of cardiac muscle tissue development	Biological process	3.26104	0.000548228	down
GO:0043068	positive regulation of programmed cell death	Biological process	3.25822	0.000551793	down
GO:0001503	ossification	Biological process	3.25752	0.000552694	down
GO:0034097	response to cytokine	Biological process	3.2423	0.000572405	down
GO:0045786	negative regulation of cell cycle	Biological process	3.2417	0.000573193	down
GO:0001823	mesonephros development	Biological process	3.23869	0.000577173	down
GO:1905114	cell surface receptor signaling pathway involved in cell-cell signaling	Biological process	3.2384	0.000577561	down
GO:0044237	cellular metabolic process	Biological process	3.23607	0.000580668	down
GO:0007264	small GTPase mediated signal transduction	Biological process	3.23192	0.000586243	down
GO:0010564	regulation of cell cycle process	Biological process	3.22374	0.000597387	down
GO:0097191	extrinsic apoptotic signaling pathway	Biological process	3.2015	0.000628781	down
GO:0046834	lipid phosphorylation	Biological process	3.18638	0.000651055	down
GO:0048870	cell motility	Biological process	3.18571	0.000652069	down
GO:0051674	localization of cell	Biological process	3.18571	0.000652069	down
GO:0044093	positive regulation of molecular function	Biological process	3.16748	0.000680018	down
GO:0030307	positive regulation of cell growth	Biological process	3.1643	0.000685015	down
GO:1904029	regulation of cyclin-dependent protein kinase activity	Biological process	3.16382	0.000685775	down
GO:0060485	mesenchyme development	Biological process	3.16035	0.00069128	down
GO:0072358	cardiovascular system development	Biological process	3.15731	0.000696132	down
GO:0035265	organ growth	Biological process	3.15717	0.000696353	down
GO:0008610	lipid biosynthetic process	Biological process	3.1504	0.000707291	down
GO:0048732	gland development	Biological process	3.14943	0.000708869	down
GO:0008625	extrinsic apoptotic signaling pathway via death domain receptors	Biological process	3.14365	0.00071837	down
GO:0035107	appendage morphogenesis	Biological process	3.14144	0.000722033	down
GO:0035108	limb morphogenesis	Biological process	3.14144	0.000722033	down
GO:0003179	heart valve morphogenesis	Biological process	3.1372	0.000729114	down
GO:0010893	positive regulation of steroid biosynthetic process	Biological process	3.1337	0.000735014	down
GO:0002053	positive regulation of mesenchymal cell proliferation	Biological process	3.13256	0.00073695	down
GO:0050789	regulation of biological process	Biological process	3.12832	0.000744177	down
GO:0045787	positive regulation of cell cycle	Biological process	3.12736	0.000745835	down
GO:0043065	positive regulation of apoptotic process	Biological process	3.1233	0.000752831	down
GO:0042326	negative regulation of phosphorylation	Biological process	3.11373	0.000769615	down
GO:1903047	mitotic cell cycle process	Biological process	3.11114	0.000774211	down
GO:0008104	protein localization	Biological process	3.10554	0.000784257	down
GO:0046620	regulation of organ growth	Biological process	3.10398	0.000787081	down
GO:1901564	organonitrogen compound metabolic process	Biological process	3.09511	0.000803315	down
GO:0031175	neuron projection development	Biological process	3.0891	0.000814511	down
GO:0046889	positive regulation of lipid biosynthetic process	Biological process	3.08621	0.000819964	down
GO:2000637	positive regulation of gene silencing by miRNA	Biological process	3.08394	0.000824244	down
GO:0051641	cellular localization	Biological process	3.0824	0.000827175	down
GO:0051649	establishment of localization in cell	Biological process	3.06933	0.000852454	down
GO:0010769	regulation of cell morphogenesis involved in differentiation	Biological process	3.05192	0.000887328	down
GO:0060688	regulation of morphogenesis of a branching structure	Biological process	3.05012	0.000891012	down
GO:0072073	kidney epithelium development	Biological process	3.04868	0.000893965	down
GO:0071705	nitrogen compound transport	Biological process	3.04516	0.000901246	down
GO:0045778	positive regulation of ossification	Biological process	3.04363	0.000904417	down
GO:0071229	cellular response to acid chemical	Biological process	3.03621	0.000920012	down
GO:0031050	dsRNA fragmentation	Biological process	3.03473	0.00092314	down
GO:0070918	production of small RNA involved in gene silencing by RNA	Biological process	3.03473	0.00092314	down
GO:0060441	epithelial tube branching involved in lung morphogenesis	Biological process	3.034	0.000924688	down
GO:0043280	positive regulation of cysteine-type endopeptidase activity involved in apoptotic process	Biological process	3.03186	0.000929257	down
GO:0006469	negative regulation of protein kinase activity	Biological process	3.03049	0.000932207	down
GO:0060420	regulation of heart growth	Biological process	3.02821	0.000937107	down
GO:0001101	response to acid chemical	Biological process	3.01126	0.000974414	down
GO:0032990	cell part morphogenesis	Biological process	3.00787	0.000982034	down
GO:0001822	kidney development	Biological process	3.0051	0.000988324	down
GO:0090068	positive regulation of cell cycle process	Biological process	3.00234	0.000994637	down
GO:0002062	chondrocyte differentiation	Biological process	2.97895	0.00104967	down
GO:1901070	guanosine-containing compound biosynthetic process	Biological process	2.97814	0.00105163	down
GO:0033993	response to lipid	Biological process	2.97584	0.00105721	down
GO:0061614	pri-miRNA transcription by RNA polymerase II	Biological process	2.97215	0.00106623	down
GO:0071417	cellular response to organonitrogen compound	Biological process	2.96807	0.00107629	down
GO:0060148	positive regulation of posttranscriptional gene silencing	Biological process	2.96667	0.00107977	down
GO:0015931	nucleobase-containing compound transport	Biological process	2.96536	0.00108304	down
GO:0048762	mesenchymal cell differentiation	Biological process	2.94816	0.00112678	down
GO:0065007	biological regulation	Biological process	2.94419	0.00113714	down
GO:0048667	cell morphogenesis involved in neuron differentiation	Biological process	2.94014	0.00114777	down
GO:0031128	developmental induction	Biological process	2.94001	0.00114813	down
GO:0051491	positive regulation of filopodium assembly	Biological process	2.94001	0.00114813	down
GO:0097306	cellular response to alcohol	Biological process	2.92514	0.00118813	down
GO:0051017	actin filament bundle assembly	Biological process	2.90575	0.00124237	down
GO:0045619	regulation of lymphocyte differentiation	Biological process	2.89912	0.00126149	down
GO:0051496	positive regulation of stress fiber assembly	Biological process	2.89608	0.00127035	down
GO:0050878	regulation of body fluid levels	Biological process	2.89501	0.00127348	down
GO:1902107	positive regulation of leukocyte differentiation	Biological process	2.88277	0.00130987	down
GO:0048812	neuron projection morphogenesis	Biological process	2.88083	0.00131575	down
GO:0014033	neural crest cell differentiation	Biological process	2.87465	0.0013346	down
GO:0071495	cellular response to endogenous stimulus	Biological process	2.87425	0.00133584	down
GO:0031400	negative regulation of protein modification process	Biological process	2.86887	0.00135248	down
GO:0030855	epithelial cell differentiation	Biological process	2.86773	0.00135602	down
GO:0051348	negative regulation of transferase activity	Biological process	2.86558	0.00136278	down
GO:0046847	filopodium assembly	Biological process	2.86504	0.00136444	down
GO:0001838	embryonic epithelial tube formation	Biological process	2.86456	0.00136596	down
GO:0034762	regulation of transmembrane transport	Biological process	2.86421	0.00136705	down
GO:0033673	negative regulation of kinase activity	Biological process	2.85786	0.0013872	down
GO:0048666	neuron development	Biological process	2.85753	0.00138826	down
GO:0086064	cell communication by electrical coupling involved in cardiac conduction	Biological process	2.85639	0.0013919	down
GO:0001656	metanephros development	Biological process	2.85423	0.00139885	down
GO:0016482	cytosolic transport	Biological process	2.83684	0.001456	down
GO:0031503	protein-containing complex localization	Biological process	2.83579	0.00145951	down
GO:0007156	homophilic cell adhesion via plasma membrane adhesion molecules	Biological process	2.83336	0.00146771	down
GO:0048015	phosphatidylinositol-mediated signaling	Biological process	2.83336	0.00146771	down
GO:0071704	organic substance metabolic process	Biological process	2.83175	0.00147317	down
GO:0030850	prostate gland development	Biological process	2.82984	0.00147966	down
GO:0045785	positive regulation of cell adhesion	Biological process	2.82103	0.00150997	down
GO:0007154	cell communication	Biological process	2.8191	0.00151669	down
GO:0003170	heart valve development	Biological process	2.81887	0.0015175	down
GO:0008152	metabolic process	Biological process	2.81852	0.00151871	down
GO:0006403	RNA localization	Biological process	2.81522	0.0015303	down
GO:0023014	signal transduction by protein phosphorylation	Biological process	2.81214	0.00154119	down
GO:0060996	dendritic spine development	Biological process	2.80897	0.0015525	down
GO:0055021	regulation of cardiac muscle tissue growth	Biological process	2.80788	0.0015564	down
GO:0060411	cardiac septum morphogenesis	Biological process	2.80788	0.0015564	down
GO:0034641	cellular nitrogen compound metabolic process	Biological process	2.80537	0.00156543	down
GO:0048634	regulation of muscle organ development	Biological process	2.803	0.00157398	down
GO:0050821	protein stabilization	Biological process	2.80104	0.00158112	down
GO:0009894	regulation of catabolic process	Biological process	2.7974	0.0015944	down
GO:0045137	development of primary sexual characteristics	Biological process	2.79628	0.00159853	down
GO:0003183	mitral valve morphogenesis	Biological process	2.79541	0.00160175	down
GO:0060502	epithelial cell proliferation involved in lung morphogenesis	Biological process	2.79541	0.00160175	down
GO:0001933	negative regulation of protein phosphorylation	Biological process	2.79044	0.00162018	down
GO:0045834	positive regulation of lipid metabolic process	Biological process	2.78956	0.00162346	down
GO:0061572	actin filament bundle organization	Biological process	2.76956	0.00169995	down
GO:0006919	activation of cysteine-type endopeptidase activity involved in apoptotic process	Biological process	2.7645	0.00171988	down
GO:0046854	phosphatidylinositol phosphorylation	Biological process	2.76436	0.00172045	down
GO:0090100	positive regulation of transmembrane receptor protein serine/threonine kinase signaling pathway	Biological process	2.76436	0.00172045	down
GO:0016567	protein ubiquitination	Biological process	2.7629	0.00172624	down
GO:0050673	epithelial cell proliferation	Biological process	2.75874	0.00174285	down
GO:1901700	response to oxygen-containing compound	Biological process	2.75494	0.00175815	down
GO:0007507	heart development	Biological process	2.75293	0.00176634	down
GO:0035556	intracellular signal transduction	Biological process	2.75018	0.00177756	down
GO:0042455	ribonucleoside biosynthetic process	Biological process	2.74624	0.00179373	down
GO:0072210	metanephric nephron development	Biological process	2.74624	0.00179373	down
GO:0006935	chemotaxis	Biological process	2.73842	0.00182635	down
GO:0048017	inositol lipid-mediated signaling	Biological process	2.73747	0.00183033	down
GO:0032989	cellular component morphogenesis	Biological process	2.73709	0.00183194	down
GO:2000116	regulation of cysteine-type endopeptidase activity	Biological process	2.73586	0.00183714	down
GO:0045184	establishment of protein localization	Biological process	2.73581	0.00183734	down
GO:0070542	response to fatty acid	Biological process	2.72998	0.00186217	down
GO:0097581	lamellipodium organization	Biological process	2.72998	0.00186217	down
GO:2001237	negative regulation of extrinsic apoptotic signaling pathway	Biological process	2.72348	0.00189023	down
GO:0042330	taxis	Biological process	2.72308	0.001892	down
GO:0043408	regulation of MAPK cascade	Biological process	2.70699	0.00196341	down
GO:0060572	morphogenesis of an epithelial bud	Biological process	2.70509	0.00197202	down
GO:0071380	cellular response to prostaglandin E stimulus	Biological process	2.70509	0.00197202	down
GO:1902043	positive regulation of extrinsic apoptotic signaling pathway via death domain receptors	Biological process	2.70509	0.00197202	down
GO:0031571	mitotic G1 DNA damage checkpoint	Biological process	2.70497	0.00197257	down
GO:0044819	mitotic G1/S transition checkpoint	Biological process	2.70497	0.00197257	down
GO:0060393	regulation of pathway-restricted SMAD protein phosphorylation	Biological process	2.69365	0.00202467	down
GO:0090092	regulation of transmembrane receptor protein serine/threonine kinase signaling pathway	Biological process	2.69153	0.00203456	down
GO:0043405	regulation of MAP kinase activity	Biological process	2.69063	0.00203879	down
GO:0060070	canonical Wnt signaling pathway	Biological process	2.69054	0.00203922	down
GO:0048665	neuron fate specification	Biological process	2.68217	0.00207887	down
GO:0097120	receptor localization to synapse	Biological process	2.68217	0.00207887	down
GO:0048704	embryonic skeletal system morphogenesis	Biological process	2.67788	0.00209952	down
GO:0051489	regulation of filopodium assembly	Biological process	2.6761	0.00210816	down
GO:0044783	G1 DNA damage checkpoint	Biological process	2.65517	0.00221224	down
GO:0023052	signaling	Biological process	2.6487	0.00224544	down
GO:0044087	regulation of cellular component biogenesis	Biological process	2.64801	0.00224902	down
GO:0045446	endothelial cell differentiation	Biological process	2.64366	0.00227163	down
GO:0009953	dorsal/ventral pattern formation	Biological process	2.63569	0.00231373	down
GO:0008406	gonad development	Biological process	2.61933	0.00240255	down
GO:0003174	mitral valve development	Biological process	2.61883	0.0024053	down
GO:0030309	poly-N-acetyllactosamine metabolic process	Biological process	2.61883	0.0024053	down
GO:0060433	bronchus development	Biological process	2.61883	0.0024053	down
GO:0071803	positive regulation of podosome assembly	Biological process	2.61883	0.0024053	down
GO:0072173	metanephric tubule morphogenesis	Biological process	2.61883	0.0024053	down
GO:1902894	negative regulation of pri-miRNA transcription by RNA polymerase II	Biological process	2.61883	0.0024053	down
GO:0032868	response to insulin	Biological process	2.6154	0.0024244	down
GO:0030326	embryonic limb morphogenesis	Biological process	2.61077	0.00245036	down
GO:0035113	embryonic appendage morphogenesis	Biological process	2.61077	0.00245036	down
GO:0035019	somatic stem cell population maintenance	Biological process	2.60643	0.00247499	down
GO:0051130	positive regulation of cellular component organization	Biological process	2.60571	0.00247906	down
GO:0001952	regulation of cell-matrix adhesion	Biological process	2.60469	0.00248491	down
GO:0003156	regulation of animal organ formation	Biological process	2.60337	0.00249248	down
GO:0007616	long-term memory	Biological process	2.60337	0.00249248	down
GO:1900077	negative regulation of cellular response to insulin stimulus	Biological process	2.60337	0.00249248	down
GO:0031331	positive regulation of cellular catabolic process	Biological process	2.5976	0.00252583	down
GO:0071560	cellular response to transforming growth factor beta stimulus	Biological process	2.59038	0.00256816	down
GO:0010829	negative regulation of glucose transmembrane transport	Biological process	2.58419	0.00260504	down
GO:0071398	cellular response to fatty acid	Biological process	2.58339	0.0026098	down
GO:0007417	central nervous system development	Biological process	2.57973	0.00263188	down
GO:0072175	epithelial tube formation	Biological process	2.57644	0.00265193	down
GO:0003007	heart morphogenesis	Biological process	2.56596	0.00271668	down
GO:0031098	stress-activated protein kinase signaling cascade	Biological process	2.56564	0.00271871	down
GO:0039694	viral RNA genome replication	Biological process	2.56117	0.00274681	down
GO:0042481	regulation of odontogenesis	Biological process	2.56117	0.00274681	down
GO:0060740	prostate gland epithelium morphogenesis	Biological process	2.56117	0.00274681	down
GO:0072273	metanephric nephron morphogenesis	Biological process	2.56117	0.00274681	down
GO:0030324	lung development	Biological process	2.55508	0.00278559	down
GO:0001708	cell fate specification	Biological process	2.54972	0.00282023	down
GO:2001236	regulation of extrinsic apoptotic signaling pathway	Biological process	2.54631	0.00284242	down
GO:0031018	endocrine pancreas development	Biological process	2.54274	0.00286592	down
GO:0007498	mesoderm development	Biological process	2.54256	0.00286705	down
GO:0016202	regulation of striated muscle tissue development	Biological process	2.54179	0.00287218	down
GO:0042886	amide transport	Biological process	2.53692	0.00290453	down
GO:0010942	positive regulation of cell death	Biological process	2.53539	0.00291483	down
GO:0010165	response to X-ray	Biological process	2.52775	0.00296655	down
GO:0060795	cell fate commitment involved in formation of primary germ layer	Biological process	2.52775	0.00296655	down
GO:2000826	regulation of heart morphogenesis	Biological process	2.52775	0.00296655	down
GO:0065008	regulation of biological quality	Biological process	2.51996	0.0030202	down
GO:1903825	organic acid transmembrane transport	Biological process	2.5147	0.00305706	down
GO:1905039	carboxylic acid transmembrane transport	Biological process	2.5147	0.00305706	down
GO:1901653	cellular response to peptide	Biological process	2.51258	0.00307202	down
GO:2001056	positive regulation of cysteine-type endopeptidase activity	Biological process	2.50999	0.00309035	down
GO:0006029	proteoglycan metabolic process	Biological process	2.50675	0.00311352	down
GO:0048661	positive regulation of smooth muscle cell proliferation	Biological process	2.50675	0.00311352	down
GO:0090287	regulation of cellular response to growth factor stimulus	Biological process	2.50599	0.00311893	down
GO:0061061	muscle structure development	Biological process	2.49143	0.00322531	down
[truncated: 1,045 more rows]

## Sheet: Table S6
Table S6: KEGG pathways modulated by differentially expressed miRNA targets in MDMs infected with HIV-1/HIV-2
[truncated: 67 more rows]

[truncated: 2 more sheets: Table S7, Table S8]
